# Supplementary material
Source: publisher figshare collection journal article supplement (https://gsapubs.figshare.com/articles/dataset/_/24596220)
Supplement: Supplementary file 1 [file 1]

Supplemental Figures

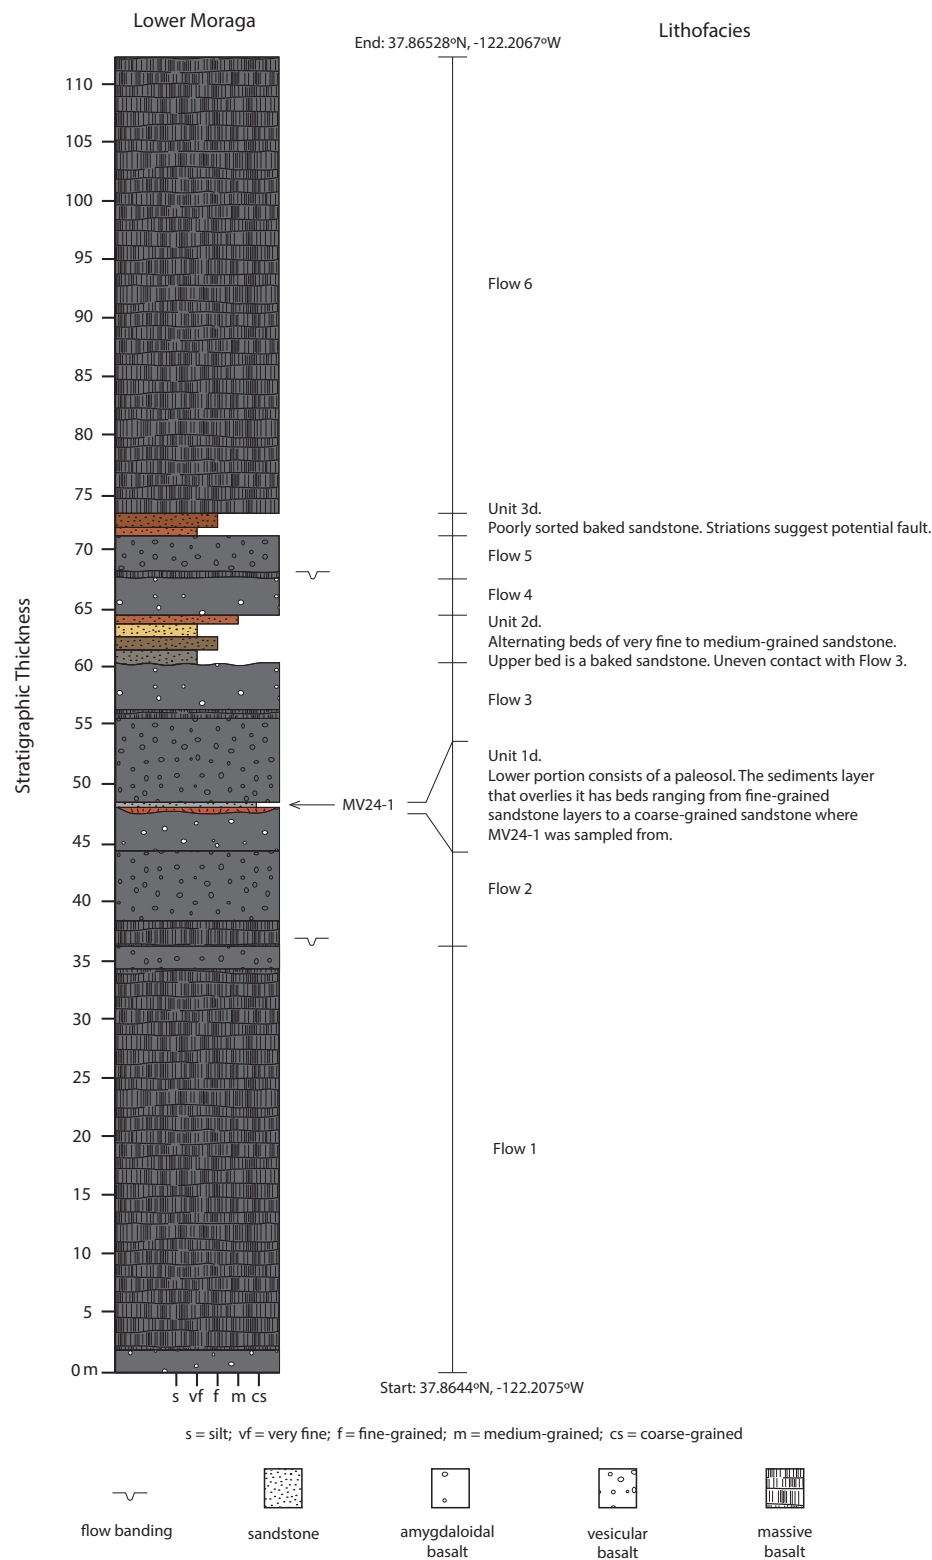

**Figure S1:** Measured stratigraphic section within the lowermost Moraga Fm measured along the Hwy 24 southside terrace where sample MV24-1 (37.86500°N, 122.20722°W) was collected for this study. The bottom of the section is the basal Moraga Fm where it is in contact with the underlying Orinda Fm correlative to unit 7c.

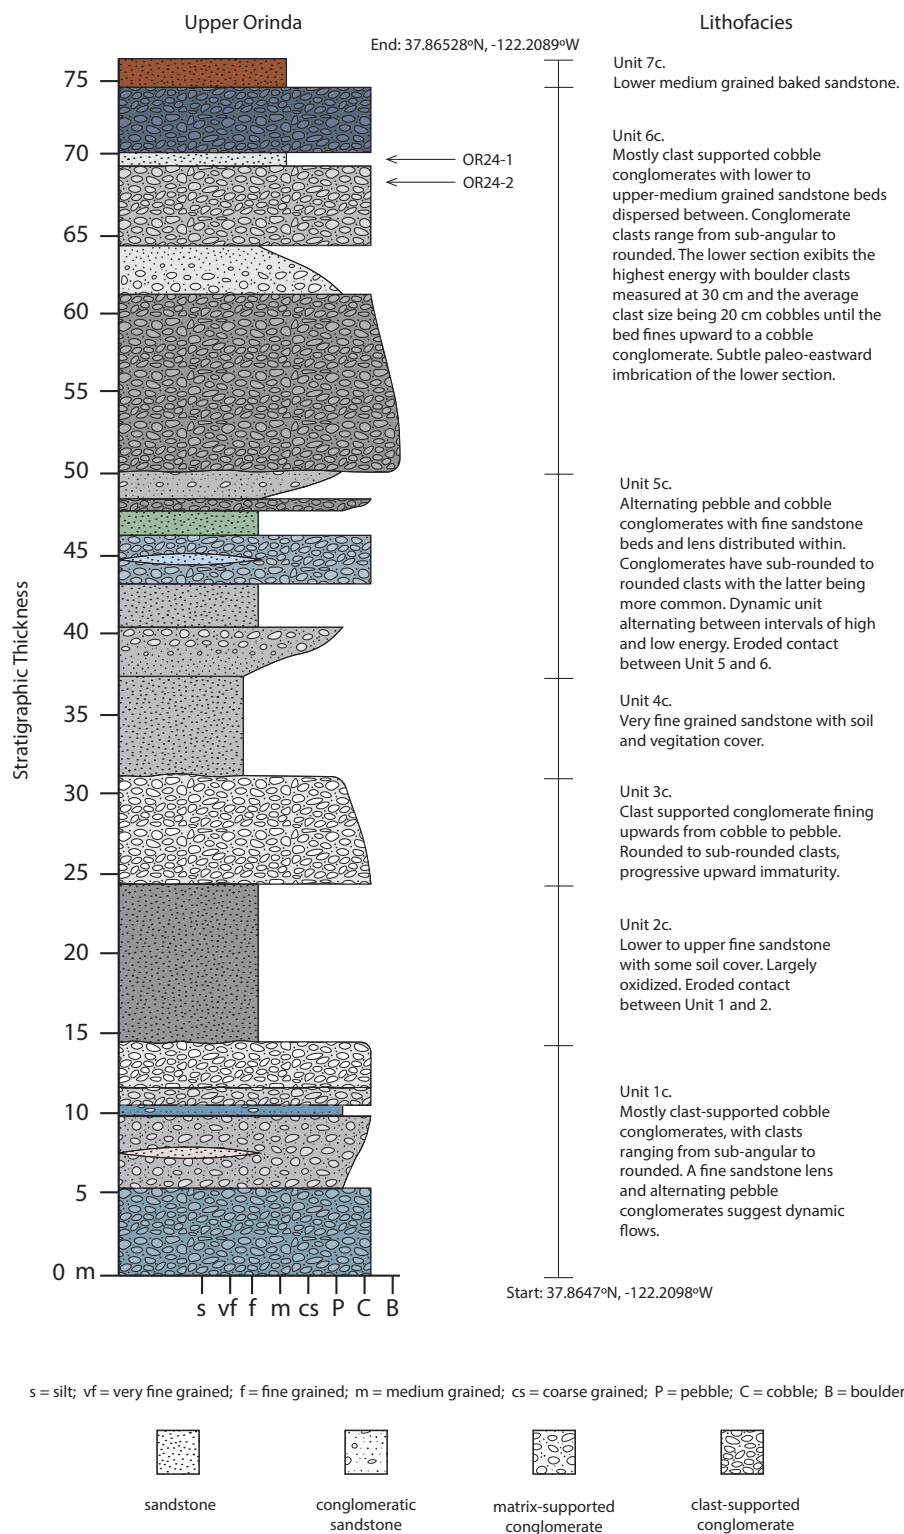

**Figure S2:** Measured stratigraphic section within the upper Orinda Fm measured along the Hwy 24 frontage road (Old Tunnel Road; northside of Hwy 24) where samples OR24-1 and OR24-2 (37.86527°N, 122.2089°W) were collected for this study. The top of the section is the top of the Orinda Fm where it is in contact with the overlying Moraga Fm. Sample OR24-4 (Moraga Fm basalt) taken 2.5 meters above the Orinda/Moraga Fm contact.



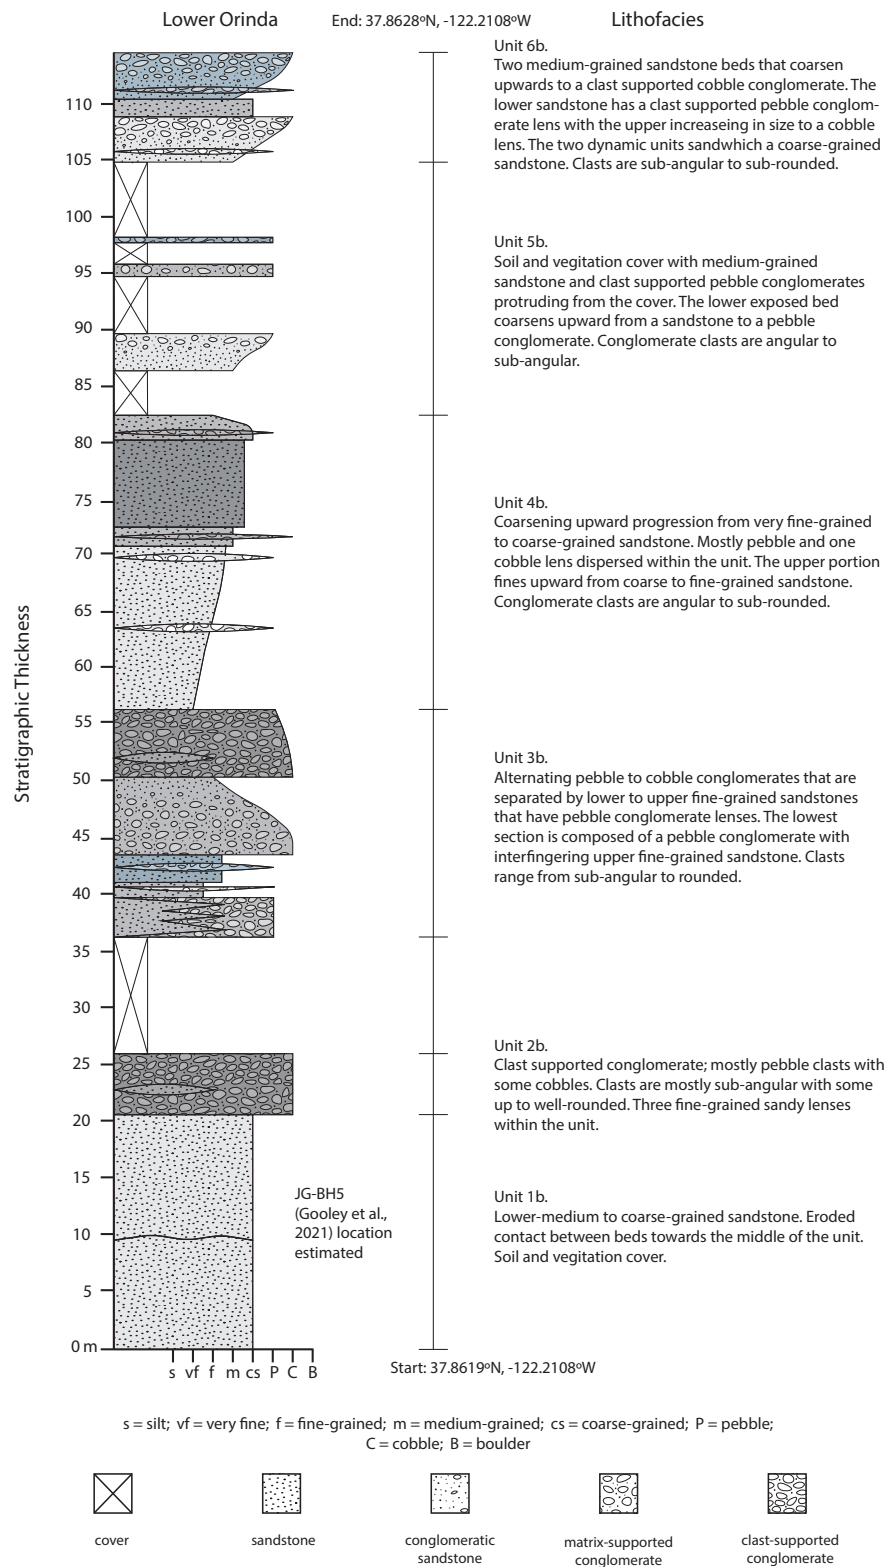

**Figure S3:** Stratigraphic section of the lower Orinda Formation measured along the Hwy 24 frontage road (Old Tunnel Road; northside of Hwy 24) with the position of the JG-BH5 sample of Gooley et al. 2021 approximately located based on their GPS points. The top of this section is ~228 meters below the start of the section soon in Figure S2.

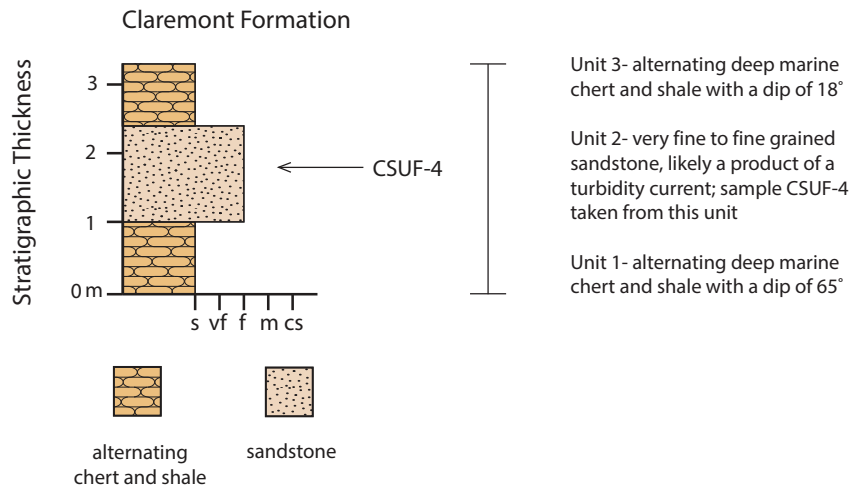

**Figure S4:** Stratigraphic section from the exposed outcrop where the Claremont Fm sample CSUF-4 (37.87055°N, 122.2319°W) was collected for this study. This section was measured along the Upper Fire Trail in the Berkeley Hills.

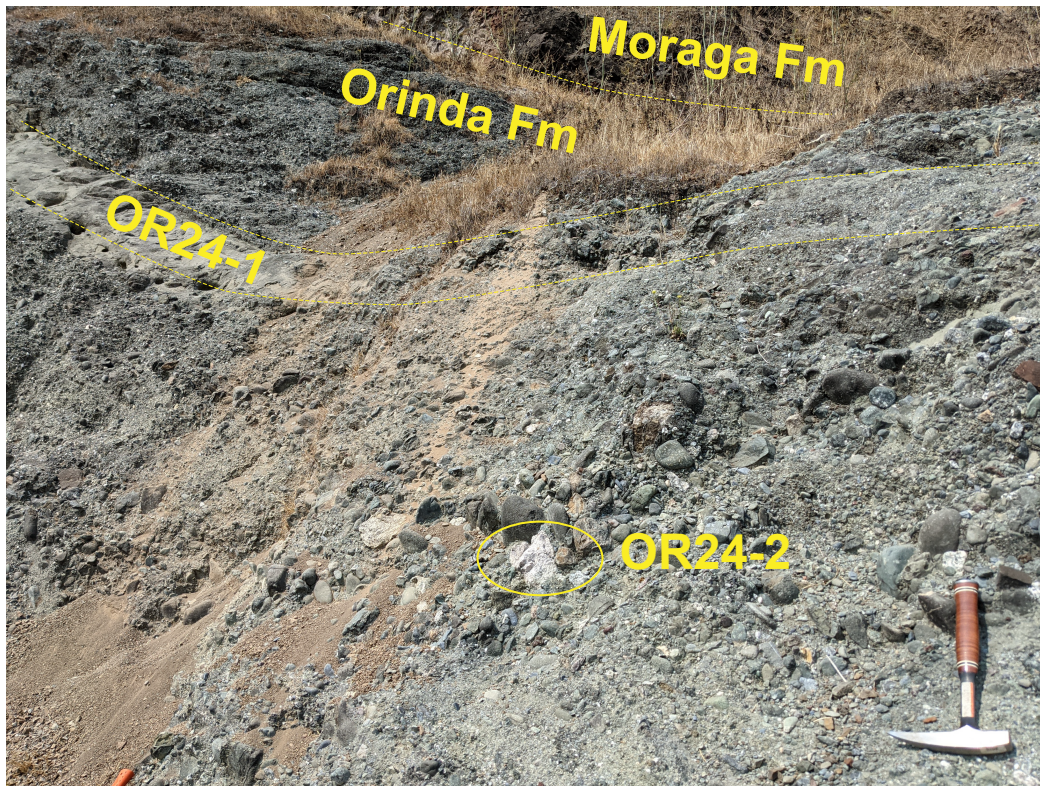

**Figure S5:** Photograph showing the location of the 19 cm diameter subangular rhyodacite tuff clast (circled in yellow) sampled as OR24-2 as well as the 0.6 m thick channelized sandstone bed sampled as OR24-1. OR24-2 was sampled 8.4 m from the top of the formation with OR24-1 sampled 7.2 m from the top of the formation. Annotated on the photo is the contact between the Orinda Fm and the overlying basal basaltic lava flow of the Moraga Fm.

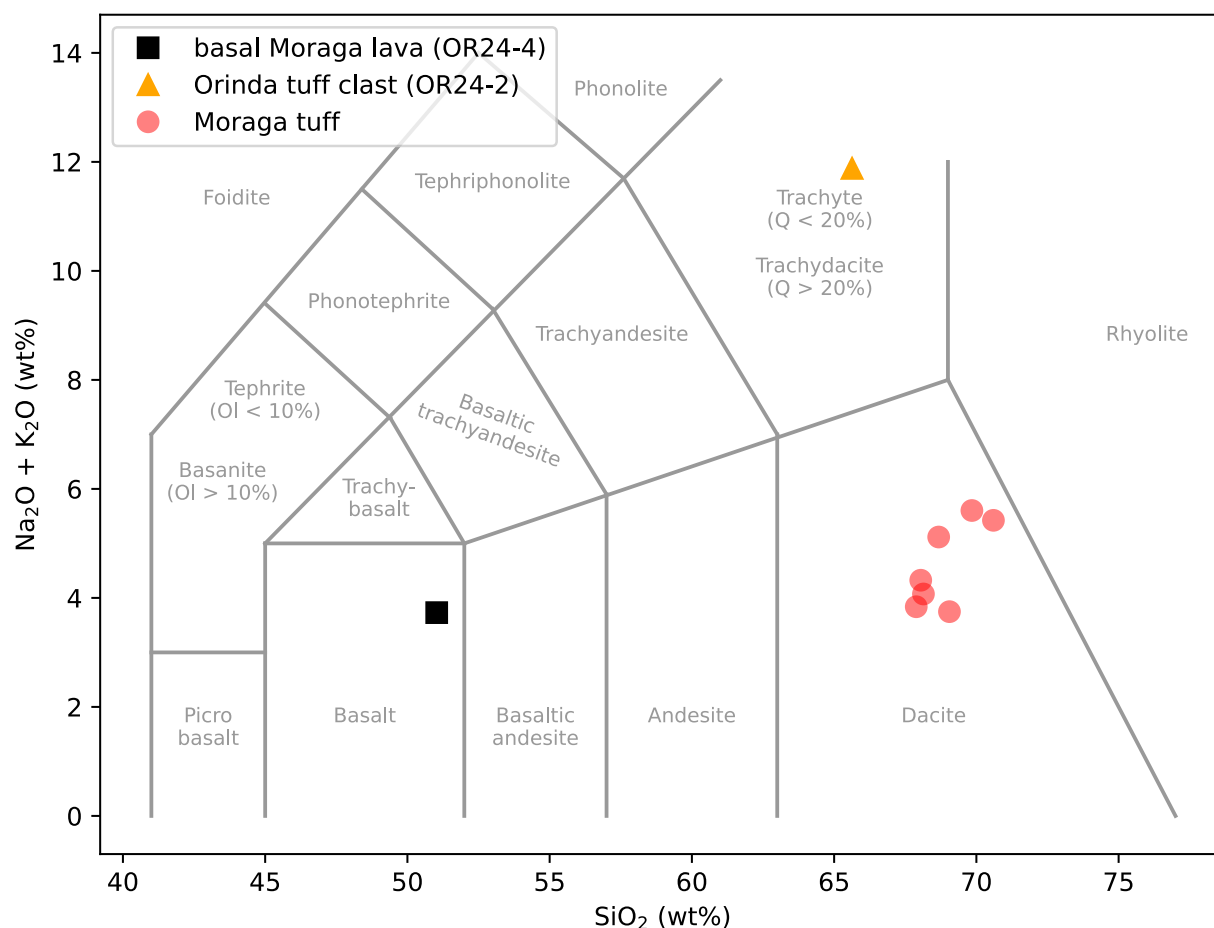

**Figure S6:** Total alkali-silica (TAS) diagram plotted with the composition of the Orinda tuff clast (OR24-2), basal Moraga lava (OR24-4), and Moraga Tuff. Data for the Moraga Tuff is from unpublished data courtesy of Prof. George Brimhall (personal communication). The TAS plot was generated using *tasplot.py*, a Python based module by John A. Stevenson based on classifications of Le Maitre et al. (2002).

## REFERENCES CITED

- Le Maitre, R. W., Streckeisen, A., Zanettin, B., Le Bas, M. J., Bonin, B., Bateman, P., Bellieni, G., Dudek, A., Efremova, S., Keller, J., Lamere, J., Sabine, P. A., Schmid, R., Sorensen, H., and Woolley, A. R., 2002, *Igneous Rocks: A Classification and Glossary of Terms, Recommendations of the International Union of Geological Sciences, Subcommittee of the Systematics of Igneous Rocks*. Cambridge University Press, doi: 10.1017/cbo9780511535581.
