# Supplementary material
Source: publisher figshare collection journal article supplement (https://gsapubs.figshare.com/articles/dataset/_/24596220)
Supplement: Supplementary file 1 [file 1]

## Sheet: Table S1 - samples
Table S1. U-Pb geochronologic LA-ICP-MS analyses and trace element concentrations.															Gerasimov, S.H., Hodgin, E.B., Crowley, J.L., and Swanson-Hysell, N.L., 2024, Chronostratigraphy of Miocene strata in the Berkeley Hills (California Coast Ranges, USA) and the arrival of the San Andreas transform boundary: Geosphere, v. 20, https://doi.org/10.1130/GES02650.1.
																																				Common Pb corrected dates
		Composition								Corrected isotope ratios											Dates (Ma)															207-method		208-method		Concentrations (ppm)
		U	Th	Pb		206Pb	206Pb			208Pb	±2s	207Pb	±2s	206Pb	±2s	error	238U	±2s	207Pb	±2s	208Pb	±2s	±2s-sys	207Pb	±2s	±2s-sys	207Pb	±2s	±2s-sys	206Pb	±2s	±2s-sys	7/6 disc.	7/5 disc.	±2s	206Pb*	±2s	206Pb*	±2s
Analysis	Notes	ppm	ppm	ppm	Th/U	cps	204Pb	±1s		232Th	(%)	235U	(%)	238U	(%)	corr.	206Pb	(%)	206Pb	(%)	232Th	(Ma)	(Ma)	206Pb	(Ma)	(Ma)	235U	(Ma)	(Ma)	238U	(Ma)	(Ma)	(%)	(%)	(%)	238U*	(Ma)	238U*	(Ma)	P	Ti	Y	Zr	Nb	La	Ce	Pr	Nd	Sm
DETRITAL SAMPLES
OR24-1 Upper Orinda Fm Sandstone
OR24-1_L_205	Sweeps 23-41	592.325	250.342	2.69222	0.422644	1896.03	76.5023	0.943704		0.00139932	14.7279	0.024273	12.0131	0.00373902	3.57084	0.291592	267.45	3.57084	0.047083	11.4701	28.2636	4.15971	4.27288	53.4502	273.7	274.204	24.352	2.89063	2.92748	24.0583	0.857482	0.959587	54.9893	1.20605	230.49	24.5962	0.873207	24.0189	1208.26	163.755	4.5464	1125.61	427865	5.97254		29.0945	0.0925075	1.36987	3.31398
OR24-1_S_437	Sweeps 23-41	221.747	158.585	3.58201	0.71516	2522.92	107.086	2.14445		0.00393781	8.56357	0.0777254	13.78	0.0127737	4.085	0.296444	78.2861	4.085	0.0441312	13.1606	79.4352	6.78914	7.17304	-103.349	323.578	323.921	76.0041	10.091	10.1853	81.8228	3.32134	3.6259	179.172	-7.65575	247.903	75.883	3.39802	82.1161	1677.1	172.814	4.37304	686.112	437047	3.15153	0.0166781	24.6889	0.0646747	1.30737	1.95767
OR24-1_M_255	Sweeps 23-41	995.404	651.079	16.1249	0.654085	12329.5	1311.19	28.1293		0.00400696	4.53125	0.0851233	6.0761	0.0129611	3.3055	0.544017	77.1542	3.3055	0.0476329	5.09829	80.8275	3.65518	4.7094	81.0765	121.027	121.905	82.9504	4.83976	5.12597	83.0155	2.72649	3.19921	-2.39159	-0.0785684	152.882	82.949	2.74407	83.2587	4361.21	181.486	4.09929	1088.69	453950	3.32761	0.0126254	34.3908	0.197328	3.51558	5.62839
OR24-1_M_211	Sweeps 23-41	362.875	181.996	5.84669	0.501539	5616.4	372.674	5.30224		0.004238	4.96157	0.0840541	6.82725	0.0132486	2.31888	0.324358	75.4799	2.31888	0.0460138	6.42138	85.4781	4.2321	5.16165	-1.67459	154.834	155.74	81.9493	5.37506	5.58434	84.845	1.95456	2.47087	5166.61	-3.53345	468461	82.6176	1.98898	85.6382	1383.2	159.094	4.07587	516.343	445835	1.32961		20.7353	0.0450114	0.647626	1.57492
OR24-1_S_433	Sweeps 23-41	266.032	165.952	4.3398	0.623804	2959.28	1267.06	36.9239		0.00391412	12.3351	0.082861	10.5593	0.0132705	4.58254	0.433982	75.3554	4.58254	0.0452859	9.51309	78.9583	9.72058	9.98923	-40.2472	231.074	231.542	80.8312	8.20431	8.33431	84.9842	3.86888	4.15272	311.156	-5.13784	1212.36	80.7451	3.91789	85.6195	1892.32
OR24-1_M_225	Sweeps 23-41	425.187	184.296	6.84453	0.433446	6566.82	285.944	3.90061		0.00456639	8.55058	0.0867443	7.33413	0.0133619	2.75102	0.363174	74.8399	2.75102	0.0470839	6.79863	92.0864	7.85601	8.48853	53.5102	162.226	163.068	84.466	5.94418	6.14539	85.5657	2.33837	2.79211	-59.9053	-1.30191	484.801	85.1805	2.37098	85.9319	1082.31	319.733	7.88486	1019.19	439637	1.98343		12.7986	0.119717	2.38257	4.9082
OR24-1_S_432	Sweeps 23-41	143.547	71.7867	2.31528	0.500091	1835.72	70.0886	1.78824		0.00416285	14.2903	0.0863364	13.1286	0.0134211	3.19252	0.243174	74.5098	3.19252	0.0466559	12.7345	83.9656	11.974	12.2215	31.6185	305.127	305.472	84.0849	10.5944	10.7033	85.9423	2.72552	3.12337	-171.81	-2.20896	2623.05	84.0465	2.80991	86.1059	1300.12	116.02	5.09758	330.213	445977	0.79392		9.05983	0.0593377	0.325144	1.37635
OR24-1_L_207	Sweeps 23-41	313.228	117.18	5.08248	0.374104	3640.87	98.7316	1.90579		0.0045409	9.99776	0.0891472	11.657	0.0137428	4.69389	0.398239	72.7656	4.69389	0.0470471	10.6702	91.5735	9.13459	9.66625	51.6327	254.697	255.239	86.7087	9.68805	9.81911	87.9883	4.10201	4.39124	-70.4119	-1.47575	840.657	87.4786	4.15306	88.6601	975.309	184.005	3.31944	377.44	447412	0.894604	0.0179478	10.2538	0.052624	0.743001	1.0866
OR24-1_M_229	Sweeps 23-41	261.859	161.765	4.67367	0.617757	4171.43	276.793	2.39807		0.00491017	9.06889	0.0968281	8.05634	0.0139729	3.91899	0.47884	71.5669	3.91899	0.0502588	7.0389	99.0022	8.95645	9.60406	207.016	163.249	164.039	93.8442	7.22155	7.42487	89.4519	3.4814	3.82959	56.7898	4.68045	34.1163	94.7861	3.49962	89.3886	1446.36
OR24-1_M_254	Sweeps 23-41	836.384	399.311	14.0095	0.477426	10917.7	581.449	10.1972		0.00434057	6.76288	0.0966974	5.71797	0.0139765	3.74543	0.655027	71.5486	3.74543	0.0501782	4.32053	87.5423	5.90758	6.72672	203.216	100.276	101.287	93.7232	5.11918	5.45976	89.4746	3.32805	3.78503	55.9708	4.5332	21.7877	93.8103	3.33303	89.6266	1317.38	189.234	3.31769	1008.03	442096	2.09377	0.0322865	16.268	0.0563289	1.51994	3.0208
OR24-1_S_430	Sweeps 23-41	124.204	55.8353	2.11089	0.449546	1556.95	149.681	3.08867		0.0050202	11.2082	0.0983325	10.3186	0.0140253	3.63447	0.352225	71.2995	3.63447	0.050849	9.65735	101.215	11.316	11.6937	234.014	222.881	223.32	95.2359	9.38025	9.53566	89.785	3.24059	3.61072	61.6326	5.7236	36.5685	95.3475	3.28068	88.9415	1373.81	165.579	6.82474	529.484	460900	1.36465		6.80518	0.00969945	0.686939	1.23572
OR24-1_L_200	Sweeps 23-41	481.578	373.626	9.14386	0.775838	5962.18	165.999	1.77853		0.00526702	7.3036	0.0954198	6.87377	0.0140729	3.05558	0.43296	71.0584	3.05558	0.049176	6.15729	106.178	7.73451	8.55642	156.23	144.141	145.061	92.5397	6.07971	6.31295	90.0875	2.73355	3.16867	42.3366	2.64989	53.2301	93.4039	2.7559	88.8568	1445.07	290.219	11.909	1446.36	439628	2.54414		32.2991	0.0487287	2.1101	5.26544
OR24-1_M_238	Sweeps 23-41	888.677	362.191	15.0556	0.407562	14234	7442.39	213.253		0.00488894	5.68783	0.0989153	4.63731	0.0141154	3.20441	0.674943	70.8444	3.20441	0.0508239	3.35208	98.5752	5.59314	6.59784	232.855	77.3792	79.0059	95.7746	4.23834	4.58813	90.3577	2.87524	3.2952	61.1957	5.65584	12.9539	96.6015	2.87568	90.5616	1167.75	278.288	2.81537	892.368	422721	3.26579	3.26779	27.5501	0.91001	4.92713	3.87968
OR24-1_M_227	Sweeps 23-41	902.739	285.909	14.9301	0.316713	14447.3	495.75	5.34376		0.00495095	4.36472	0.0964196	4.7902	0.0141555	2.86955	0.581557	70.6441	2.86955	0.0494015	3.83558	99.8224	4.34623	5.57406	166.964	89.6117	91.0642	93.466	4.27732	4.60887	90.6121	2.58197	3.04448	45.7294	3.05337	29.1688	94.2206	2.59092	90.8811	780.089
OR24-1_S_422	Sweeps 23-41	122.111	78.8416	2.15274	0.645657	1428.74	183.874	7.12706		0.00421124	21.0203	0.100697	15.9971	0.0141801	5.55831	0.347457	70.5213	5.55831	0.0515033	15.0005	84.9395	17.8171	17.988	263.434	344.358	344.639	97.4193	14.86	14.9625	90.7688	5.00986	5.26089	65.544	6.82669	45.0807	97.5552	5.07156	91.4066	1594.85
OR24-1_M_241	Sweeps 23-41	609.771	230.368	10.2445	0.377794	9453.96	368.724	7.1023		0.00490614	6.97925	0.0860204	6.66468	0.0141953	4.09087	0.605072	70.4458	4.09087	0.0439496	5.26144	98.9212	6.88709	7.73649	-113.464	129.615	130.726	83.7894	5.3601	5.57895	90.8655	3.69111	4.03105	180.083	-8.445	91.5405	84.3351	3.72979	91.1981	923.903	383.589	4.23938	1440.97	448060	3.42098	0.0366318	18.877	0.0729926	1.22803	3.9422
OR24-1_M_235	Sweeps 23-41	210	131.215	3.73093	0.624835	3273.8	93.8308	1.09563		0.0043539	9.32414	0.0863249	10.6097	0.0142758	3.39194	0.313059	70.0484	3.39194	0.0438564	10.0529	87.8106	8.16983	8.74108	-118.784	247.916	248.502	84.0741	8.56071	8.70056	91.3773	3.0776	3.48287	176.927	-8.68662	160.576	84.6999	3.14423	92.7221	1747.44	234.181	13.3975	1027.76	436382	1.05042		17.6857	0.0729426	2.44945	4.79482
OR24-1_L_185	Sweeps 23-41	824.594	300.393	14.0509	0.364292	13412.4	1367.58	12.6067		0.00474318	7.74219	0.0957781	5.72963	0.0144962	4.66646	0.805334	68.9838	4.66646	0.0479195	3.32458	95.6431	7.38738	8.09492	95.3085	78.7112	80.427	92.8717	5.08511	5.36237	92.7774	4.29842	4.60254	2.65565	0.101534	80.519	93.5804	4.31196	93.3861	1078.69	194.067	2.89409	651.582	429960	2.19918	0.475212	24.4104	0.116653	1.08476	1.53297
OR24-1_L_191	Sweeps 23-41	308.275	196.731	5.79351	0.638167	4280.62	203.709	5.58459		0.0051456	8.68422	0.0961474	8.28102	0.0146665	4.25546	0.506977	68.1827	4.25546	0.0475456	7.10397	103.737	8.98566	9.67174	76.7081	168.778	169.59	93.2139	7.37534	7.57132	93.8596	3.96522	4.30193	-22.3595	-0.692742	269.272	94.0446	3.99656	93.7723	458.506	224.263	6.38495	1505.28	451005	1.12749	0.0565801	8.08238	0.306061	4.75207	7.10397
OR24-1_M_243	Sweeps 23-41	345.47	81.2288	6.36126	0.235126	5190.86	226.277	5.02848		0.0100601	15.5031	0.157967	11.6072	0.0147538	5.15178	0.439862	67.779	5.15178	0.0776532	10.4013	202.32	31.2094	32.0309	1138.03	206.908	207.363	148.922	16.0778	16.2974	94.4145	4.82858	5.11391	91.7037	36.6012	1.5669	151.283	4.73236	91.2919	561.149	257.087	6.56216	761.385	411502	1.79031	3.76884	17.6926	0.962007	3.81864	2.37505
OR24-1_S_435	Sweeps 23-41	676.873	236.763	11.8236	0.34979	8488.17	1651.83	32.4553		0.0050322	7.52905	0.0951733	7.04236	0.0150175	4.74948	0.674416	66.589	4.74948	0.0459638	5.19974	101.457	7.61957	8.1726	-4.29906	125.44	126.289	92.3111	6.21414	6.43358	96.0893	4.5299	4.84031	2335.12	-4.09284	65217.6	92.2336	4.56319	95.7864	864.693	240.161	3.17849	895.752	438948	3.19699		19.1177	0.034785	0.550368	2.31905
OR24-1_L_190	Sweeps 23-41	587.05	294.061	10.986	0.500913	8206.76	214.753	7.20139		0.00523786	8.97864	0.103584	5.73675	0.015198	4.29353	0.738547	65.7983	4.29353	0.0494317	3.80472	105.592	9.45602	10.1332	168.397	88.8669	90.3483	100.079	5.46743	5.76564	97.2354	4.1435	4.4889	42.2584	2.84164	30.5707	100.979	4.1509	97.4666	1457.11	173.608	3.98535	1128.95	443960	1.28739		15.7675	0.0626193	1.39449	3.02796
OR24-1_M_252	Sweeps 23-41	216.756	119.293	4.04448	0.550357	3193.66	771.394	50.4764		0.00477228	10.5235	0.0976802	9.72382	0.0153243	3.12739	0.321621	65.256	3.12739	0.0462302	9.20718	96.2285	10.1025	10.7043	9.66799	221.524	222.017	94.6327	8.78613	8.99251	98.0373	3.04281	3.62698	-914.04	-3.5977	23234.8	94.5629	3.10274	98.2031	1650.95	296.131	9.58228	1036.81	446620	0.950342		9.1205	0.136317	2.23325	4.4101
OR24-1_M_240	Sweeps 23-41	536.565	162.588	9.67426	0.303016	9396.75	311.114	4.2264		0.00496425	8.91293	0.105053	5.48524	0.0156223	3.21805	0.573165	64.011	3.21805	0.0487708	4.44208	100.09	8.8989	9.58519	136.818	104.362	105.616	101.43	5.2948	5.61102	99.9294	3.19098	3.65412	26.962	1.4791	55.7606	102.293	3.20698	100.82	780.025
OR24-1_L_182	Sweeps 23-41	143.194	83.0623	2.89709	0.58007	2522.25	270.883	2.69272		0.00620381	6.47165	0.103085	10.8036	0.0157246	4.68626	0.428955	63.5946	4.68626	0.0475459	9.73435	125.005	8.06492	9.15299	76.7226	231.27	231.864	99.6197	10.2514	10.4121	100.579	4.67679	5.00594	-31.0939	-0.962577	395.213	100.527	4.72854	99.2761	1498.4	125.729	10.833	415.173	434628	0.811027		9.45529	0.0117523	0.387052	1.13718
OR24-1_S_421	Sweeps 23-35	629.04	399.896	12.3755	0.635725	8576.76	242.966	5.50206		0.00502014	5.66802	0.0943398	6.52581	0.015798	4.32546	0.662824	63.2993	4.32546	0.0433104	4.88636	101.214	5.72249	6.82881	-149.743	121.231	122.187	91.538	5.71225	5.97384	101.044	4.33655	4.73665	167.479	-10.3849	54.707	91.3426	4.38628	101.026	1599.88	231.511	2.86623	1144.96	428110	3.49862		15.542	0.0400702	1.22385	3.40803
OR24-1_L_194	Sweeps 23-41	905.416	618.87	18.5485	0.683521	13524.5	7071.21	276.925		0.00543196	3.87586	0.105944	4.88804	0.0158725	3.89471	0.784009	63.0019	3.89471	0.0484095	2.95367	109.494	4.23237	5.67077	119.357	69.6172	71.5315	102.249	4.75455	5.10799	101.517	3.92284	4.31659	14.9467	0.715201	49.7175	103.036	3.93485	101.483	1851.76	300.754	4.65432	2246.62	432119	3.23535	0.0256484	22.7931	0.263113	4.29534	11.4001
OR24-1_M_256	Sweeps 23-41	206.254	58.6304	3.78983	0.284264	2967.87	246.606	14.9244		0.00531459	14.603	0.105538	8.584	0.0160984	4.36687	0.508722	62.1179	4.36687	0.0475472	7.39023	107.135	15.6035	16.0912	76.7879	175.576	176.183	101.875	8.3206	8.5707	102.951	4.46001	4.91803	-34.0712	-1.05528	306.61	101.854	4.49814	102.761	691.295	321.021	4.56642	989.432	458289	1.19635		10.2475	0.0193404	0.732666	2.04049
OR24-1_M_232	Sweeps 23-41	217.816	99.4466	4.27995	0.456563	4037.93	153.242	3.99201		0.00532633	8.67425	0.120267	6.15763	0.0161828	4.50415	0.722826	61.7939	4.50415	0.0539003	4.19869	107.371	9.28892	10.0244	366.885	94.6254	95.9045	115.314	6.71225	7.03269	103.486	4.62396	4.97812	71.7933	10.2573	7.38331	116.591	4.60564	104.247	1324.75	182.181	8.6436	624.364	428652	0.693064		8.32679	0.0203458	0.529678	1.87502
OR24-1_L_209	Sweeps 23-41	91.4896	53.4186	1.90358	0.583877	1345.65	108.179	1.68782		0.00552564	12.2089	0.110059	13.7276	0.0166083	5.60501	0.405153	60.2108	5.60501	0.0480617	12.5312	111.378	13.5605	14.0952	102.326	296.296	296.752	106.019	13.8199	13.9551	106.185	5.90291	6.19802	-3.77124	-0.15592	300.537	107.019	5.97412	106.831	1798.46	212.712	8.62864	1377.75	431955	0.431368		7.54657	0.154896	4.554	8.06372
OR24-1_M_217	Sweeps 23-41	163.563	88.1755	3.37426	0.539094	3157.83	113.542	3.15351		0.00564059	8.38546	0.110519	11.6371	0.0166188	4.54991	0.386419	60.1727	4.54991	0.048232	10.7107	113.688	9.50651	10.2894	110.705	252.854	253.386	106.44	11.7594	11.9192	106.251	4.79472	5.15426	4.02307	0.177303	219.257	107.42	4.85655	106.696	1386.41	175.177	4.51108	994.211	443821	0.577768	0.0196567	8.05964	0.0793668	1.61564	2.82051
OR24-1_S_431	Sweeps 23-41	767.576	336.349	14.7386	0.438196	11170.2	1437.56	65.4976		0.00354152	7.78605	0.131904	5.28942	0.0166929	2.39734	0.453233	59.9055	2.39734	0.0573092	4.71495	71.4554	5.55373	5.93141	503.419	103.769	104.622	125.807	6.25874	6.64486	106.721	2.53741	3.16442	78.8007	15.1708	4.39874	126.188	2.53625	109.243	1293.97	328.299	41.2419	2172.56	449784	4.27974	4.36783	50.9335	6.17517	38.844	26.4692
OR24-1_L_203	Sweeps 23-41	350.553	212.779	7.48135	0.606981	4746.94	333.479	8.76429		0.00597306	6.37202	0.10594	6.93145	0.0167825	4.40938	0.628197	59.5858	4.40938	0.0457828	5.34812	120.369	7.64715	8.69941	-13.7734	129.249	130.342	102.245	6.74191	6.99651	107.289	4.69164	5.06434	878.957	-4.93369	7309.78	103.055	4.73239	107.059	1644.3	204.809	4.70875	716.884	430808	0.801359	0.584881	11.647	0.175572	2.60038	4.0502
OR24-1_M_224	Sweeps 23-41	1007.49	287.28	19.5043	0.285144	18289.3	586.357	10.0073		0.00561092	5.35767	0.114758	6.12577	0.0168007	3.10285	0.493861	59.5212	3.10285	0.0495397	5.2818	113.092	6.04216	7.21537	173.406	123.258	124.317	110.308	6.40314	6.71063	107.405	3.305	3.81629	38.0617	2.63236	44.0674	111.115	3.32604	107.944	717.822	346.564	2.20363	2213.26	449804	7.35919		16.0645	0.0404737	1.42819	5.06443
OR24-1_S_425	Sweeps 23-41	914.196	501.748	19.0649	0.54884	12875.6	546.505	8.01701		0.00546813	3.55494	0.11066	6.12562	0.0170506	4.5723	0.746422	58.6489	4.5723	0.0470704	4.07644	110.222	3.90765	5.05601	52.7818	97.2852	98.3554	106.569	6.1971	6.4832	108.989	4.9414	5.30359	-106.489	-2.27098	380.707	106.52	4.9704	108.876	1355.44	230.696	3.90537	1216.83	448196	3.5534		28.2418	0.0661647	1.79293	3.83981
OR24-1_S_434	Sweeps 23-41	352.142	143.639	7.07811	0.407901	5117.64	444.189	13.4181		0.00511408	7.58393	0.10994	10.1708	0.0172167	4.53118	0.445509	58.083	4.53118	0.046313	9.10568	103.103	7.79936	8.35752	13.9788	218.903	219.387	105.91	10.2292	10.4039	110.042	4.94386	5.31473	-687.201	-3.90068	12327.3	105.827	5.00578	110.501	1068.47	145.153	4.10823	476.571	441524	0.613085		8.235	0.0435387	0.361645	1.21438
OR24-1_M_246	Sweeps 23-41	546.507	194.801	11.173	0.356447	9966.61	353.068	8.85744		0.00569464	6.91594	0.114703	6.21846	0.0174267	4.33422	0.688173	57.3833	4.33422	0.0477372	4.45913	114.774	7.91523	8.92031	86.2606	105.752	107.009	110.258	6.49721	6.80097	111.372	4.78565	5.18015	-29.111	-1.01029	158.382	111.127	4.81183	112.174	896.924	196.13	3.64658	847.448	444920	1.14547	0.040056	9.8672	0.0588115	0.488297	1.5314
OR24-1_M_249	Sweeps 23-41	326.626	142.019	6.7265	0.434804	5190.08	206.013	6.57082		0.00545004	9.81389	0.107768	10.6367	0.0174426	5.8972	0.554418	57.3311	5.8972	0.0448102	8.8523	109.858	10.7521	11.4872	-65.9658	216.087	216.608	103.921	10.507	10.7136	111.473	6.51725	6.892	268.985	-7.26645	553.642	103.768	6.59275	111.587	1224.7	226.495	6.0701	964.762	450820	1.07053		8.27132	0.0519596	1.08262	2.22561
OR24-1_L_197	Sweeps 23-41	151.093	59.6573	3.15164	0.394839	2313.07	185.951	5.8682		0.00595883	21.5308	0.112681	12.4901	0.0175091	5.93846	0.472175	57.1132	5.93846	0.046675	10.9881	120.083	25.7783	26.1082	32.6243	263.23	263.759	108.414	12.8433	12.9946	111.894	6.58744	6.88084	-242.977	-3.20946	2767.39	109.351	6.66093	112.528	984.96	271.907	25.1306	1030.08	434722	0.893726		6.51051	0.0752304	0.951893	3.28986
OR24-1_L_175	Sweeps 23-41	152.309	40.3314	3.07955	0.264799	2645.74	103.361	4.31523		0.00599044	14.4108	0.113146	12.8909	0.0176321	4.7405	0.363752	56.7147	4.7405	0.0465408	11.9876	120.718	17.3447	17.845	25.7458	287.546	288.033	108.839	13.3046	13.4512	112.673	5.29487	5.65882	-337.637	-3.52284	4887.85	109.767	5.38244	113.471	725.468	115.623	2.87766	298.626	430602	0.349414		3.26792		0.101884	0.46648
OR24-1_S_438	Sweeps 23-41	167.366	54.1234	3.40939	0.323383	2782.16	541.416	10.8764		0.00584577	15.1841	0.110668	11.4804	0.0176778	4.21443	0.367097	56.5682	4.21443	0.0454038	10.6789	117.812	17.8366	18.1635	-33.9446	259.08	259.496	106.576	11.6151	11.7714	112.963	4.71926	5.12709	432.786	-5.99262	2540	106.446	4.80261	112.711	955.074	192.899	5.28891	676.148	400439	0.686486		5.89319	0.0236294	0.581317	1.44718
OR24-1_L_187	Sweeps 23-41	142.043	52.1303	2.96356	0.367002	2850.72	229.174	8.98791		0.00578154	11.8443	0.113728	11.5375	0.0177366	3.63497	0.309251	56.3806	3.63497	0.0465045	10.9499	116.521	13.7614	14.3385	23.9015	262.742	263.275	109.37	11.9626	12.1273	113.335	4.0837	4.55178	-374.176	-3.62582	5212.5	110.296	4.17048	114.304	1109.63	154.102	4.74438	598	427797	0.534152		5.55734	0.0518773	0.910676	1.80112
OR24-1_L_174	sweeps 23-36	281.904	177.185	6.32579	0.628531	4981.84	149.587	2.01163		0.0057519	12.4921	0.123666	7.16099	0.0177701	3.97118	0.546733	56.2742	3.97118	0.0504727	5.95899	115.925	14.4401	15.1678	216.849	137.957	138.818	118.39	8.0023	8.30888	113.548	4.4697	4.94848	47.6374	4.08994	33.3762	119.428	4.48849	114.344	1851.89	229.937	14.5492	2061.51	434162	1.08422	0.0149211	7.20049	0.252208	4.683	9.58677
OR24-1_S_417	Sweeps 23-41	347.726	198.109	7.59494	0.569727	5092.28	655.347	15.0466		0.00543883	8.8563	0.121862	8.32898	0.0178592	3.78297	0.454193	55.9934	3.78297	0.0494885	7.42031	109.633	9.68312	10.195	171.07	173.232	173.81	116.759	9.18652	9.41779	114.112	4.27884	4.72892	33.2952	2.26681	67.5939	116.812	4.3158	114.538	1751.46	207.606	6.43885	2095.77	441108	0.813539		10.5806	0.167639	3.90132	8.85842
OR24-1_L_180	Sweeps 23-41	173.572	39.168	3.51022	0.225659	3119.58	145.762	3.81897		0.00571204	15.9959	0.118043	7.33826	0.0178968	2.48714	0.325579	55.876	2.48714	0.047837	6.90393	115.124	18.3628	18.7915	91.2499	163.577	164.411	113.296	7.86692	8.13166	114.35	2.81897	3.47203	-25.3151	-0.92997	224.664	114.311	2.86896	115.459	627.929	244.53	4.59911	601.797	444090	0.422088		2.54838	0.0205311	0.403053	1.18208
OR24-1_L_201	Sweeps 23-41	65.4028	31.1681	1.48117	0.476556	1037.64	144.602	3.23608		0.00702874	23.5043	0.129333	13.7608	0.0181677	4.86209	0.349698	55.0427	4.86209	0.0516307	12.8732	141.569	33.1585	33.5149	269.061	295.231	295.664	123.498	16.0016	16.1571	116.065	5.59271	5.96085	56.8627	6.0186	47.3787	124.812	5.66571	115.313	1184.37	174.209	17.1627	615.598	447999	0.430321		5.47877	0.052833	0.589309	2.69125
OR24-1_M_216	Sweeps 23-41	69.433	40.4649	1.55495	0.582791	1372.79	72.5133	1.978		0.00544953	15.6164	0.112038	13.768	0.0182167	4.60766	0.330854	54.8947	4.60766	0.0446063	12.9741	109.848	17.1078	17.5252	-77.0678	317.374	317.829	107.828	14.0847	14.2217	116.376	5.31408	5.70314	251.004	-7.92664	621.89	108.672	5.42673	118.273	1040.12	151.265	10.9796	391.163	462457	0.767842		11.3661	0.0269966	0.678844	1.40593
OR24-1_M_219	Sweeps 23-41	110.141	62.5857	2.55527	0.568233	2128.56	1112.95	29.5531		0.00664368	12.4161	0.133556	10.8298	0.0182668	5.59048	0.51223	54.744	5.59048	0.0530271	9.27529	133.839	16.5628	17.203	329.996	210.403	210.992	127.288	12.956	13.1591	116.693	6.46501	6.79035	64.6381	8.32344	22.6315	128.677	6.47911	116.315	1550.16	170.765	11.3165	580.223	458041	0.357912		5.33565	0.0866335	1.54614	2.49893
OR24-1_L_186	sweeps 23-36	218.845	99.6635	4.78097	0.455406	4645.28	174.336	5.63344		0.00559309	10.6609	0.111597	7.95787	0.0183278	3.7375	0.462193	54.5619	3.7375	0.0441611	7.02558	112.733	11.985	12.8012	-101.699	172.683	173.458	107.425	8.11205	8.36505	117.079	4.33632	4.85861	215.123	-8.98681	195.522	108.09	4.4005	118.458	802.218	210.871	3.05269	498.337	447726	1.15819	0.0447049	8.51504	0.04224	0.599927	1.48911
OR24-1_S_423	Sweeps 23-41	108.522	45.4552	2.3935	0.418858	1667.42	49.9766	1.39238		0.00624154	15.3374	0.130334	11.5481	0.0184959	6.269	0.542861	54.066	6.269	0.0511069	9.69835	125.763	19.2289	19.5739	245.672	223.356	223.792	124.398	13.5204	13.6988	118.143	7.33894	7.62961	51.9102	5.02778	43.8233	124.522	7.36777	117.624	1390.61	185.901	8.74826	678.434	433436	0.788707		7.55814	0.046645	0.521607	1.45384
OR24-1_S_429	Sweeps 23-41	392.186	107.835	8.28196	0.27496	6249.03	269.591	10.0363		0.00609012	9.22646	0.120512	8.05979	0.0185688	5.48971	0.681123	53.8537	5.48971	0.04707	5.90112	122.721	11.2885	11.8402	52.7631	140.832	141.573	115.536	8.80171	9.03939	118.605	6.45151	6.78421	-124.787	-2.65595	600.112	115.474	6.49717	118.425	798.929	227.43	1.8076	854.908	445904	0.638198		5.31273	0.03496	0.766367	1.98948
OR24-1_L_181	Sweeps 23-41	197.411	164.094	4.89748	0.831231	3839.36	102.836	2.51549		0.00606898	6.18751	0.121981	7.18294	0.018692	3.49404	0.476729	53.499	3.49404	0.0473301	6.27585	122.296	7.54425	8.65254	65.8998	149.406	150.327	116.867	7.92939	8.20769	119.384	4.13293	4.64279	-81.1594	-2.15375	410.766	117.87	4.17603	120.257	2528.65	239.593	20.6117	1774.46	436343	0.666577	0.0290033	11.3918	0.323675	4.52929	7.99229
OR24-1_M_257	Sweeps 23-41	96.9803	49.521	2.20564	0.51063	1671.82	83.886	2.26554		0.00633258	10.5212	0.106583	16.3851	0.0187365	4.94029	0.301511	53.3717	4.94029	0.0412572	15.6226	127.591	13.3818	14.176	-271.715	397.049	397.357	102.835	16.0245	16.1581	119.666	5.8573	6.33223	144.041	-16.3665	64.3918	102.492	6.01717	118.998	1138.94	232.888	12.0743	777.074	457393	0.683755		9.14434	0.0245413	0.849442	2.27983
OR24-1_M_231	Sweeps 23-41	119.272	49.1367	2.70349	0.411973	2672.03	120.489	4.56623		0.00633759	14.095	0.135285	10.5686	0.0188808	4.66293	0.436337	52.9639	4.66293	0.0519673	9.48429	127.692	17.9414	18.4914	283.941	216.929	217.507	128.836	12.7877	12.9982	120.579	5.57024	5.96941	57.5339	6.40923	32.5031	130.18	5.60773	121.346	724.656	206.793	9.20667	865.569	412231	0.653117		4.20418	0.0632997	1.23353	3.24273
OR24-1_M_223	sweeps 23-36	323.769	168.747	7.60241	0.521194	6837.83	6837.83	51.7411		0.00641146	5.42776	0.126461	6.70548	0.0190587	3.09187	0.450479	52.4695	3.09187	0.048124	5.95011	129.176	6.98898	8.69189	105.338	140.612	141.484	120.913	7.64364	7.98193	121.704	3.72764	4.37818	-15.5369	-0.6546	154.267	121.828	3.76661	122.132	1563.63	189.351	7.04923	707.586	446110	1.10929		16.5113	0.0696077	1.24221	1.94673
OR24-1_M_214	Sweeps 23-41	199.002	54.3287	4.4343	0.273006	4300.43	599.289	8.27983		0.00650777	10.0277	0.136166	8.49712	0.0193258	4.63839	0.53974	51.7443	4.63839	0.0511011	7.11944	131.11	13.1047	13.8664	245.368	163.975	164.756	129.623	10.3402	10.602	123.394	5.66904	6.07832	49.7108	4.80602	33.6867	130.9	5.69237	124.269	611.798	181.319	7.11219	570.063	442119	0.711682		5.34236	0.0196792	0.58129	1.57685
OR24-1_S_416	Sweeps 23-41	122.592	39.5964	2.71601	0.322993	2037.22	262.18	4.40013		0.0058082	16.0384	0.130216	11.0836	0.0193344	3.7498	0.338321	51.7212	3.7498	0.0488464	10.43	117.057	18.7197	19.0269	140.488	244.871	245.285	124.292	12.9662	13.1515	123.448	4.58501	5.07533	12.1291	0.678876	153.194	124.309	4.66405	123.778	829.186	200.032	6.00522	755.016	440783	0.78633		5.58227	0.0252616	0.338985	0.847144
OR24-1_M_230	Sweeps 23-41	111.355	29.0171	2.45471	0.260582	2437.42	1274.43	26.0691		0.0060011	18.6488	0.127404	8.75335	0.0193576	4.14154	0.466514	51.6594	4.14154	0.0477344	7.7116	120.933	22.4852	22.8808	86.1637	182.887	183.624	121.763	10.044	10.2842	123.595	5.06996	5.52646	-43.4416	-1.5046	304.519	122.848	5.12374	124.953	742.261	188.148	9.42689	583.995	437241	0.765705		4.2629	0.0226246	0.532057	1.78193
OR24-1_S_424	Sweeps 23-41	173.695	118.044	4.20797	0.679602	2764.92	107.497	5.89528		0.00580417	8.79824	0.119186	15.4652	0.0194172	5.12102	0.331131	51.5006	5.12102	0.0445181	14.5928	116.976	10.2621	10.812	-81.969	357.316	357.624	114.334	16.7228	16.8463	123.972	6.28797	6.65783	251.242	-8.4297	659.334	114.139	6.42584	124.778	1243.17	269.076	5.15115	1534.03	452548	1.03952		14.091	0.216545	4.13036	7.4343
OR24-1_M_253	Sweeps 23-41	220.501	63.0947	4.83331	0.286142	3782.88	124.207	3.07753		0.00549642	11.787	0.118268	7.48854	0.0194891	1.80597	0.241164	51.3107	1.80597	0.0440125	7.26751	110.79	13.0232	13.6445	-109.995	178.917	179.557	113.501	8.04173	8.35779	124.426	2.22555	3.34729	213.12	-9.62569	184.011	113.28	2.30271	125.046	756.941	263.856	8.27603	1035.2	454085	0.496915		1.82588	0.059885	1.11441	2.78602
OR24-1_M_233	Sweeps 23-41	127.537	51.6355	2.98339	0.404867	2757.91	99.6048	2.19862		0.00652465	11.0498	0.130397	6.73014	0.0196048	3.97027	0.580949	51.008	3.97027	0.0482397	5.43431	131.449	14.4777	15.1956	111.034	128.285	129.323	124.455	7.88299	8.19931	125.158	4.92117	5.40166	-12.7206	-0.564968	130.31	125.58	4.95601	126.032	1226.73	173.904	6.96601	511.359	438779	0.524511		6.17145	0.0289276	0.879907	1.39621
OR24-1_M_244	Sweeps 23-41	237.52	83.2856	5.5127	0.350647	5091.94	1120.56	25.3581		0.00664609	10.3405	0.131965	8.17616	0.0197284	4.30464	0.519725	50.6883	4.30464	0.0485138	6.95124	133.887	13.7988	14.6046	124.446	163.683	164.487	125.862	9.67843	9.94306	125.939	5.36862	5.8177	-1.20011	-0.0615856	133.178	126.966	5.41235	126.724	773.024	168.12	6.30536	1169.81	435169	0.509579		5.21616	0.0487629	1.07397	3.52528
OR24-1_M_247	Sweeps 23-41	146.254	47.2611	3.40882	0.323145	3183.7	121.673	3.28942		0.00666249	12.4144	0.140286	8.75579	0.0199346	3.96891	0.446453	50.1641	3.96891	0.0510393	7.80459	134.217	16.6069	17.2907	242.638	179.84	180.54	133.298	10.9377	11.199	127.242	5.00063	5.48975	47.5586	4.54301	38.9234	134.625	5.03853	128.164	968.302	189.674	10.476	349.259	434871	0.573188		4.77047	0.0502713	0.474469	0.964458
OR24-1_M_221	Sweeps 23-41	192.027	90.4015	4.67773	0.470774	4313.29	362.781	6.73285		0.00678592	7.70159	0.138436	6.61522	0.0199622	4.24661	0.633368	50.0947	4.24661	0.0502967	5.07223	136.695	10.4921	11.5191	208.743	117.601	118.698	131.65	8.16798	8.50672	127.417	5.35778	5.81689	38.9598	3.21521	34.4844	132.904	5.37646	127.99	1296.74	175.181	7.49703	1279.44	443680	0.566303		7.05621	0.048254	1.15485	5.21229
OR24-1_M_242	Sweeps 23-41	122.404	29.4219	2.82902	0.240367	2754.11	606.08	9.45699		0.00674897	21.712	0.138709	9.06423	0.0202767	2.97436	0.319307	49.3178	2.97436	0.0496142	8.56233	135.953	29.419	29.8154	176.941	199.682	200.33	131.893	11.2112	11.4614	129.404	3.81057	4.4525	26.8661	1.88708	82.5612	133.146	3.87964	130.451	593.794	228.599	6.1871	747.332	442018	0.479949		2.59965	0.019802	0.588764	1.65363
OR24-1_M_212	Sweeps 23-41	166.1	35.8527	3.85811	0.21585	3853.69	680.906	14.8728		0.00766205	9.21323	0.133851	8.70748	0.0203987	3.61359	0.407306	49.0227	3.61359	0.0475902	7.92225	154.276	14.1597	15.1283	78.9467	188.139	188.863	127.552	10.4373	10.6891	130.175	4.65682	5.19912	-64.89	-2.05654	392.996	128.643	4.72023	130.631	525.532	150.651	5.22479	485.573	443621	0.544723		2.60984	0.00776389	0.248176	1.00707
OR24-1_M_228	Sweeps 23-41	299.937	51.285	6.8928	0.170986	6915.42	1521.82	37.8189		0.00721991	13.2635	0.138104	5.73107	0.0205497	2.8255	0.478174	48.6626	2.8255	0.0487415	4.98615	145.406	19.2166	19.8772	135.423	117.174	118.301	131.353	7.06136	7.4488	131.129	3.66761	4.34524	3.17098	0.170875	83.8243	132.471	3.70105	131.954	420.124	149.063	1.32652	307.546	431354	0.507214		2.99903	0.00788881	0.21718	0.505933
OR24-1_M_210	Sweeps 23-41	340.715	68.33	7.88833	0.200549	7812.93	4084.71	69.65		0.00702694	11.0293	0.137856	5.27358	0.0205514	3.06628	0.566466	48.6586	3.06628	0.0486501	4.29052	141.533	15.5555	16.3043	131.042	100.907	102.226	131.132	6.48744	6.90527	131.14	3.98049	4.61078	-0.0744703	-0.00548333	77.1206	132.226	4.00847	132.005	534.189	234.072	12.8494	985.957	424902	1.10106		1.15014	0.0672134	1.21909	3.203
OR24-1_M_250	Sweeps 23-41	79.0971	33.0069	1.92482	0.417296	1534.89	55.1624	2.06833		0.00633342	20.0753	0.153725	9.42344	0.0205771	4.4765	0.475039	48.5977	4.4765	0.0541826	8.29229	127.608	25.537	25.9645	378.615	186.499	187.011	145.196	12.7492	13.0677	131.302	5.81829	6.3878	65.3204	9.56882	17.1515	145.468	5.83595	131.552	1345.3	190.069	6.50379	514.739	451248	0.319645		5.19489	0.0188198	0.49906	1.5042
OR24-1_L_184	Sweeps 23-41	78.1686	38.7054	1.96868	0.495153	1733.86	176.79	4.50006		0.00662939	16.5675	0.148945	13.7098	0.0206073	4.90187	0.353919	48.5266	4.90187	0.052421	12.8036	133.552	22.0533	22.5319	303.822	291.803	292.236	140.98	18.0464	18.2226	131.493	6.3803	6.79213	56.7204	6.72977	41.6205	142.471	6.46131	132.72	1133.08	215.117	12.0909	642.531	439923	0.479691		8.28398	0.0218666	0.59129	2.48166
OR24-1_M_239	Sweeps 23-41	159.52	71.6764	3.98901	0.449326	3518.62	198.767	7.25325		0.00666533	10.379	0.144234	8.09855	0.0207557	5.43547	0.665745	48.1795	5.43547	0.0503999	6.00352	134.274	13.8901	14.6858	213.439	139.078	139.995	136.808	10.3655	10.6545	132.43	7.12477	7.50417	37.9541	3.20021	40.5669	138.124	7.14751	133.648	1257.87	197.657	7.0364	1341.93	445559	0.417591		6.17442	0.0405125	1.6953	4.80585
OR24-1_L_204	Sweeps 23-41	178.495	46.8473	4.29624	0.262457	3063.79	674.198	36.3907		0.00731891	12.0169	0.155525	10.434	0.0208078	5.36543	0.509892	48.0589	5.36543	0.0542093	8.9488	147.392	17.6475	18.3637	379.722	201.225	201.834	146.779	14.2595	14.4998	132.759	7.05026	7.43361	65.0378	9.55149	18.6203	148.377	7.06115	133.478	739.769	178.109	9.80336	753.857	442169	0.619699		1.26003	0.0262984	0.641947	2.17451
OR24-1_L_193	Sweeps 23-41	59.178	27.3548	1.51136	0.462247	1179.69	61.0091	2.48266		0.00708049	17.8713	0.160964	13.7364	0.0208783	5.34688	0.385936	47.8967	5.34688	0.0559156	12.6531	142.608	25.3961	25.8668	449.009	281.096	281.522	151.547	19.3381	19.5266	133.204	7.04918	7.43445	70.3337	12.1035	18.6384	153.313	7.09528	133.913	1258.72	208.598	12.5514	526.948	435459	0.391471		8.0567	0.0279815	0.308133	1.33579
OR24-1_M_234	Sweeps 23-41	242.306	84.8951	5.89557	0.350363	5516.05	1548.97	34.6933		0.00648978	10.9953	0.133587	11.0184	0.0208856	4.32903	0.387878	47.88	4.32903	0.0463892	10.1323	130.748	14.3298	15.0555	17.8957	243.406	243.972	127.316	13.1843	13.384	133.25	5.70923	6.18127	-644.593	-4.6613	10127.5	128.305	5.8026	134.684	1048.26	154.601	3.85625	920.336	444404	0.270819		5.98203	0.0242629	1.04648	2.74145
OR24-1_L_199	Sweeps 23-41	195.399	97.5207	5.00217	0.499086	3811.61	838.796	19.6033		0.00683104	9.48955	0.135265	12.1695	0.0209992	4.79132	0.389549	47.6209	4.79132	0.0467177	11.1866	137.6	13.0133	13.8491	34.7817	267.879	268.399	128.818	14.7228	14.9054	133.968	6.35259	6.78229	-285.167	-3.99798	2966.5	129.87	6.45412	135.042	1651.27	247.438	8.80268	1650.17	436976	0.588761		5.9406	0.131006	2.44657	6.25819
OR24-1_S_426	Sweeps 23-41	137.143	44.1657	3.3016	0.322042	2275.36	218.743	9.57424		0.00619871	13.5402	0.136844	8.43192	0.0210855	4.23931	0.50277	47.426	4.23931	0.0470698	7.28872	124.903	16.8599	17.2472	52.7972	173.943	174.544	130.229	10.3058	10.5597	134.513	5.64332	6.122	-154.772	-3.28894	839.429	130.144	5.70657	135.006	577.606	191.588	6.94003	766.415	461040	0.738898		5.42109	0.0166474	0.52745	1.92007
OR24-1_L_177	Sweeps 23-41	93.2334	49.5455	2.4302	0.531413	1985.56	112.165	2.46048		0.00680151	12.9265	0.144467	9.74951	0.0211841	3.83529	0.386867	47.2052	3.83529	0.0494604	8.96345	137.008	17.6504	18.2796	169.702	209.314	209.948	137.015	12.4962	12.7361	135.135	5.12888	5.65893	20.3691	1.37199	98.265	138.315	5.19579	136.406	1372.28	194.324	9.72316	627.01	436871	0.511356		10.1821		0.641428	1.83923
OR24-1_L_202	Sweeps 23-41	137.74	59.0972	3.54933	0.429048	2488.14	346.743	8.48543		0.00764324	10.7436	0.143947	6.63553	0.021227	3.95235	0.586375	47.1098	3.95235	0.0491826	5.33003	153.899	16.4714	17.3025	156.531	124.769	125.831	136.553	8.47816	8.82713	135.406	5.29591	5.81519	13.4956	0.839956	69.0345	137.824	5.32911	135.52	1213.26	168.83	5.92156	1148.75	429888	0.389741		5.93128	0.0423236	1.73612	4.36382
OR24-1_M_226	Sweeps 23-41	272.338	223.373	7.76351	0.820205	6332.99	135.755	1.86712		0.0072764	5.76323	0.147008	7.05308	0.0212683	2.93576	0.404624	47.0183	2.93576	0.050131	6.41305	146.539	8.41484	9.84672	201.082	148.897	149.765	139.267	9.17873	9.51427	135.667	3.94123	4.61966	32.5317	2.58489	49.9974	140.526	3.98441	135.522	2417.24	314.263	16.536	2204.18	443035	1.3348	0.0408271	16.5355	0.508167	7.61532	12.1416
OR24-1_L_179	Sweeps 23-41	155.756	52.9176	3.9094	0.339747	3589.84	789.991	14.0226		0.00706572	11.1867	0.151722	8.32651	0.0213826	3.42751	0.403101	46.767	3.42751	0.0514621	7.58834	142.311	15.864	16.6132	261.586	174.261	174.997	143.431	11.1377	11.4298	136.388	4.62561	5.21718	47.8612	4.91063	34.7783	144.853	4.6708	137.432	1010.19	96.4603	5.2989	320.815	433559	0.49959		4.91458	0.00430828	0.212834	0.62393
OR24-1_M_237	Sweeps 23-41	63.6586	12.5133	1.54871	0.196568	1493.94	44.1584	0.993204		0.00787288	24.2001	0.159271	10.8248	0.0214011	4.45504	0.406607	46.7265	4.45504	0.0539757	9.86553	158.505	38.2083	38.6183	370.065	222.211	222.755	150.065	15.1008	15.338	136.505	6.01742	6.4889	63.1133	9.03587	22.2087	151.717	6.05968	137.214	519.699	168.699	2.9382	427.625	445310	0.305975		2.16599		0.258265	1.1368
OR24-1_S_436	Sweeps 23-41	69.5334	28.7934	1.78073	0.414094	1278.01	25.6236	0.555071		0.00732431	15.9186	0.133648	14.9742	0.0216074	6.21506	0.41505	46.2804	6.21506	0.0448598	13.6235	147.501	23.3945	23.7849	-63.2808	332.385	332.714	127.37	17.9249	18.0669	137.807	8.47388	8.8178	317.77	-8.19401	1143.93	127.162	8.62018	137.156	1015.05	192.96	6.16927	595.993	418933	0.318023	0.014103	5.05972	0.0153254	0.241195	1.54974
OR24-1_S_415	Sweeps 23-41	103.27	31.417	2.59378	0.304223	2062.23	71.6087	1.83455		0.00804927	16.5023	0.140472	8.58366	0.021649	4.58165	0.533764	46.1916	4.58165	0.0470599	7.25863	162.042	26.6337	27.0467	52.2987	173.241	173.845	133.464	10.7351	10.9897	138.069	6.25858	6.71417	-164.001	-3.45028	874.593	133.373	6.32529	136.908	770.603	220.918	6.67888	638.659	431514	0.489252		4.53062	0.00812621	0.615485	1.47939
OR24-1_L_195	Sweeps 23-41	140.394	66.3316	3.67865	0.472467	2761.72	156.009	7.9356		0.00665049	9.76652	0.150069	10.0149	0.0217493	3.93584	0.386831	45.9785	3.93584	0.0500431	9.20905	133.976	13.0415	13.8339	196.991	213.975	214.588	141.973	13.2691	13.5114	138.702	5.40077	5.93399	29.5898	2.30376	76.53	143.326	5.46903	140.507	1286.83	303.044	6.33894	1282.38	428856	0.50715		6.81312	0.0695333	1.93018	4.44384
OR24-1_L_208	Sweeps 23-41	60.3846	31.2237	1.63669	0.517081	1170.03	119.301	4.73914		0.00798688	18.1224	0.124816	12.8528	0.0218418	6.4217	0.496698	45.7838	6.4217	0.0414459	11.1336	160.791	29.0236	29.5482	-260.087	282.301	282.853	119.429	14.4816	14.6431	139.285	8.84856	9.18747	153.553	-16.6261	58.2267	120.152	9.01726	138.95	376.468	160.572	10.7404	704.743	445801	0.27572	0.0252957	7.02149	0.0588048	0.882904	3.49904
OR24-1_M_218	Sweeps 23-41	36.0603	9.58768	0.918138	0.265879	883.458	35.4996	1.33574		0.00859311	28.1295	0.148806	18.4821	0.0218665	6.23462	0.335236	45.732	6.23462	0.0493559	17.3988	172.943	48.4405	48.8086	164.777	406.659	406.984	140.857	24.3083	24.4398	139.442	8.6003	8.94984	15.3757	1.00477	208.913	142.205	8.75462	139.477	696.76	178.273	3.2899	397.552	435364	0.201583	0.00384392	2.06198	0.0149708	0.183686	0.720089
OR24-1_L_173	Sweeps 23-41	83.2186	36.8041	2.22899	0.442258	1655.99	364.413	6.43863		0.00777758	18.7392	0.15356	10.9686	0.0220019	4.439	0.399696	45.4507	4.439	0.0506196	10.0302	156.593	29.231	29.7374	223.515	231.934	232.495	145.051	14.8259	15.0509	140.295	6.16043	6.64067	37.2321	3.2784	65.1906	146.484	6.23032	140.599	1266.6	157.105	9.96561	733.785	446463	0.463323		6.6842		0.879925	1.89618
OR24-1_L_189	sweeps 23-36	64.0684	21.4458	1.64231	0.334734	1477.24	36.5231	0.857147		0.00657225	19.0738	0.134823	13.6872	0.0222497	5.64366	0.409459	44.9443	5.64366	0.0439478	12.4695	132.405	25.1721	25.7184	-113.596	307.196	307.634	128.422	16.5113	16.6875	141.859	7.91857	8.35141	224.88	-10.4627	337.784	129.221	8.06724	143.676	1131.63	239.444	6.58551	578.675	449584	0.337135		5.51467	0.0104984	0.518482	1.27568
OR24-1_M_245	Sweeps 23-41	206.037	79.0153	5.44897	0.383501	4959.68	280.173	10.1117		0.00762264	6.93569	0.143459	7.71664	0.0222644	2.93591	0.369967	44.9149	2.93591	0.0467324	7.13631	153.486	10.605	11.9411	35.5924	170.859	171.656	136.12	9.83029	10.1316	141.951	4.122	4.833	-298.823	-4.28324	1914.56	137.196	4.19315	142.636	838.183	182.857	4.46166	477.045	448469	1.5078		10.316	0.0452004	0.791877	1.15632
OR24-1_S_419	Sweeps 23-41	282.899	93.6141	7.39258	0.33091	5021.76	174.375	8.78078		0.00710742	7.43684	0.143483	9.63826	0.022739	5.55777	0.576636	43.9773	5.55777	0.0457643	7.87447	143.148	10.6081	11.3954	-14.7372	190.338	190.902	136.141	12.28	12.5117	144.943	7.96573	8.36459	1083.52	-6.46549	12702.8	135.967	8.06155	145.038	919.631	251.306	4.99293	914.346	453143	1.54972		8.46737	0.0561211	0.984772	1.9319
OR24-1_M_213	Sweeps 23-41	203.284	131.673	6.04301	0.647726	5328.43	2786.23	36.932		0.0080658	8.13237	0.164119	7.64881	0.023086	4.4009	0.568183	43.3163	4.4009	0.0515594	6.2559	162.373	13.1519	14.297	265.894	143.553	144.438	154.302	10.9493	11.2903	147.13	6.40172	6.91299	44.6658	4.64801	29.9711	155.774	6.42778	146.972	1655.58	226.867	17.961	921.861	435879	0.846562	0.00905442	9.15996	0.213056	3.67218	4.96612
OR24-1_L_196	Sweeps 23-41	54.2788	24.6957	1.491	0.45498	1137.66	28.8339	1.77482		0.00657425	29.5921	0.123987	21.0119	0.0233362	3.99216	0.187097	42.8519	3.99216	0.0385341	20.6291	132.445	39.065	39.3305	-448.329	543.386	543.696	118.68	23.5348	23.6332	148.706	5.86865	6.43291	133.169	-25.2998	40.223	119.19	6.17127	151.49	1324.53	176.453	3.37196	694.136	420616	0.237746		3.88209	0.0397271	1.25708	2.5074
OR24-1_S_418	Sweeps 23-41	251.51	331.265	8.75979	1.31711	4956.7	165.963	5.26137		0.00732286	5.07943	0.15693	8.97039	0.0240457	4.85614	0.541352	41.5875	4.85614	0.0473333	7.54226	147.471	7.46345	8.60718	66.0507	179.55	180.13	148.012	12.3549	12.6236	153.174	7.35067	7.82913	-131.904	-3.48761	630.499	147.911	7.43199	154.594	4334.73	308.182	6.84879	1176.48	434007	3.9827		51.9943	0.126532	2.18059	4.47387
OR24-1_L_188	Sweeps 23-41	109.016	58.587	3.29355	0.537417	2948.71	131.389	2.07977		0.00869464	7.52486	0.156489	9.89291	0.0241584	4.39727	0.43889	41.3934	4.39727	0.0469801	8.86192	174.978	13.11	14.433	48.219	211.671	212.327	147.625	13.5924	13.8463	153.884	6.68656	7.21918	-219.135	-4.23956	1401.01	148.833	6.78328	153.622	1467.86	191.052	10.9978	636.953	431516	1.29732		9.07866	0.0673466	0.872221	2.42621
OR24-1_S_420	Sweeps 23-41	208.117	125.165	6.32034	0.601416	4018.35	386.313	15.3325		0.00793661	9.41172	0.15874	11.6672	0.0244446	3.67724	0.315178	40.9088	3.67724	0.0470979	11.0725	159.783	14.979	15.6825	54.2014	264.175	264.571	149.6	16.2292	16.4388	155.685	5.65634	6.2848	-187.234	-4.06771	1400.01	149.481	5.78717	155.275	1537.71	268.806	9.68611	778.178	450429	1.72182	0.136771	12.739	0.0715585	1.33196	2.61418
OR24-1_M_220	Sweeps 23-41	485.135	234.517	14.633	0.483405	12466.1	332.924	6.83455		0.00828457	5.11178	0.1686	6.08148	0.0247242	3.01841	0.483199	40.4462	3.01841	0.0494577	5.27954	166.759	8.48928	10.277	169.567	123.291	124.352	158.203	8.90902	9.3436	157.444	4.69475	5.46041	7.14961	0.479842	67.5674	159.406	4.73994	158.072	1308.34	121.916	4.07074	1012.39	444385	1.05897	0.0400783	11.316	0.105079	1.46571	3.22668
OR24-1_L_178	Sweeps 23-41	136.907	69.8968	4.52294	0.510542	3333.48	145.152	3.56078		0.0110244	14.3109	0.192753	14.1653	0.0257483	3.529	0.244256	38.8375	3.529	0.0542941	13.7187	221.608	31.541	32.4603	383.285	308.283	308.682	178.976	23.2439	23.4563	163.883	5.71055	6.40163	57.2425	8.43285	34.4228	180.845	5.89299	160.738	1429.86
OR24-1_S_427	Sweeps 23-41	38.5808	7.19591	1.54292	0.186515	1278.54	164.543	6.11642		0.0124817	21.2386	0.272055	13.8768	0.0356906	6.37165	0.459159	28.0185	6.37165	0.0552843	12.3275	250.72	52.9206	53.4182	423.766	275.062	275.395	244.336	30.1349	30.4117	226.066	14.1545	14.6993	46.6531	7.47728	34.7877	244.665	14.2617	225.357	506.965	159.565	1.72987	332.064	440553	0.188139		2.48525		0.192526	1.00771
OR24-1_M_248	Sweeps 23-41	255.07	63.4103	17.0347	0.2486	15693.4	1685.43	54.0966		0.0179454	5.35102	0.440616	4.38808	0.0586578	3.22205	0.71748	17.048	3.22205	0.0544796	2.97886	359.499	19.0668	22.9879	390.939	66.8503	68.6158	370.687	13.6275	14.8774	367.457	11.5086	13.1726	6.00643	0.87118	16.3402	373.089	11.6412	370.573	408.289	240.654	15.1692	948.855	437939	1.14838		1.85294	0.07395	1.82128	4.43577
OR24-1_S_414	Sweeps 23-41	117.924	93.0155	10.1384	0.788772	6852.26	658.758	14.7572		0.0201433	8.32763	0.535784	8.08738	0.0661991	6.1144	0.756043	15.1059	6.1144	0.0586997	5.29336	403.093	33.2355	35.2157	555.993	115.458	116.213	435.641	28.6482	29.4121	413.216	24.473	25.4883	25.6797	5.14754	16.0488	435.985	24.6634	414.531	2279.24	199.255	14.2844	1088.26	431926	1.12814	0.0254296	15.6353	0.337533	6.14039	9.7498
OR24-1_S_428	Sweeps 23-41	118.404	116.353	29.009	0.982675	20447.5	588.362	10.492		0.0526419	4.8674	1.8122	6.2389	0.180127	4.96216	0.795357	5.55165	4.96216	0.0729671	3.78166	1036.95	49.1994	57.3716	1013.04	76.6468	77.6252	1049.87	40.8224	42.6455	1067.67	48.8245	51.8881	-5.39221	-1.69486	9.31735	1049.71	51.3309	1072.24	2533.83	174.563	16.6325	1164.63	438654	0.635168	0.0124457	11.4749	0.320322	3.77826	7.08752
OR24-1_M_222	Sweeps 23-41	470.254	103.481	117.025	0.220053	113546	4435.93	205.405		0.0649818	3.30276	2.61523	3.17712	0.217566	2.65657	0.807621	4.5963	2.65657	0.08718	1.74262	1272.51	40.7323	59.2793	1364.49	33.5611	36.125	1304.93	23.3366	27.1735	1269	30.6012	36.7308	6.99828	2.75285	3.20346	1299.05	32.3757	1258.98	447.644	986.645	9.40913	2971.69	438488	1.08342		3.14552	0.0535512	1.1395	4.63961
OR24-1_L_176	Sweeps 23-41	570.447	57.6891	140.694	0.10113	116307	5719.91	88.0138		0.0685502	5.70473	2.71199	4.23344	0.222168	4.10911	0.956626	4.5011	4.10911	0.0885329	1.01842	1340.12	73.971	86.6771	1394.1	19.5335	23.6819	1331.74	31.4054	34.3889	1293.32	48.1523	52.3598	7.22875	2.88516	3.69051	1325.49	50.9323	1282.24	104.719	818.811	5.94569	2366.27	449220	1.00109		1.31371	0.0188813	0.411512	2.50571
OR24-1_L_192	Sweeps 23-41	415.879	92.5285	110.896	0.222489	94943.2	4669.24	72.9759		0.0712646	3.65199	2.80799	4.526	0.231789	4.16479	0.907286	4.31427	4.16479	0.0878621	1.77179	1391.4	49.1042	67.6171	1379.49	34.0522	36.5959	1357.67	33.8879	36.7447	1343.87	50.5205	54.8668	2.58205	1.01662	4.3812	1353.76	53.8998	1335.78	480.703	1084.63	10.0113	3378.78	449390	1.04037	0.0149341	1.68921	0.0746697	1.03614	5.48911
OR24-1_M_236	Sweeps 23-41	190.228	52.9581	63.2816	0.278393	61926.1	5208.46	291.276		0.0830382	3.75361	4.13785	3.49737	0.279538	3.15032	0.879082	3.57733	3.15032	0.107358	1.51892	1612.33	58.1695	80.0757	1755.05	27.788	30.5304	1661.81	28.6	32.585	1589.03	44.367	50.9592	9.4593	4.37933	2.90614	1662.2	48.2141	1588.2	344.844	139.949	3.23062	381.133	435177	0.51118		4.49516	0.022378	0.595534	1.32727
OR24-1_M_251	Sweeps 23-41	164.558	61.5796	56.1506	0.374212	44866.9	1649.59	44.8174		0.0788476	3.56328	4.03847	4.50515	0.282425	3.95561	0.878021	3.54077	3.95561	0.103708	2.15626	1533.97	52.6369	75.7468	1691.51	39.7644	41.3502	1641.98	36.6655	40.5216	1603.56	56.1569	63.1114	5.19937	2.33966	3.99857	1642.19	61.3891	1606.85	747.884	423.202	13.4314	1109.49	439698	0.892837		4.84054	0.05809	1.00644	3.66828
OR24-1_S_413	Sweeps 23-41	417.506	32.7683	145.333	0.0784858	115255	8245.25	188.859		0.0759042	9.9572	4.61875	5.57677	0.308643	5.2031	0.932994	3.23999	5.2031	0.108534	2.00703	1478.75	141.985	147.952	1774.96	36.6272	38.2634	1752.66	46.5476	49.1209	1734.02	79.107	83.6045	2.30649	1.06338	4.89156	1752.76	87.9735	1736.4	170.251	290.34	7.87418	427.526	454063	0.803338	0.0198519	0.776377	0.0527334	1.17939	4.68368
OR24-1_L_183	Sweeps 23-41	108.386	89.5977	46.0419	0.826651	39151.4	3147.48	88.8157		0.093015	2.62131	4.68477	4.38961	0.312637	3.95249	0.886379	3.1986	3.95249	0.108679	1.90958	1797.67	45.0876	74.824	1777.4	34.8383	37.0926	1764.52	36.7309	40.0586	1753.67	60.6855	66.5447	1.3353	0.615182	3.92393	1767.67	67.7631	1755.25	1521.51	226.085	23.3647	758.846	425078	0.951401	0.0511155	9.53066	0.334175	4.87628	5.92806
OR24-1_L_198	Sweeps 23-41	137.151	144.843	106.113	1.05608	67548.8	1966.64	46.4688		0.148895	3.49529	13.7861	3.27217	0.517035	2.99824	0.891514	1.93411	2.99824	0.193384	1.31059	2805.45	91.5577	128.744	2771.15	21.4971	24.3496	2735.12	30.978	35.8465	2686.59	65.8733	76.53	3.0513	1.7744	2.49325	2734.36	92.6099	2670.37	1455.39	170.197	3.89532	702.265	427123	1.3247	0.00444995	13.9213	0.0274409	0.425291	1.91426
MV24-1 Moraga Fm Interflow Sandstone																																	7/6 disc.	7/5 disc.
MV24-1_L_123	sweeps 23-41	40.0863	10.3529	0.111727	0.258266	163.611	26.5799	1.55405		0.00210683	30.9553	0.0364391	26.3326	0.00197876	11.4829	0.436072	505.368	11.4829	0.133559	23.6971	42.5388	13.1541	13.1807	2145.28	414.068	414.099	36.3414	9.40043	9.42312	12.7433	1.46186	1.47986	99.406	64.9346	0.133375	36.8484	1.39504	11.5039	654.282	106.194	3.35221	92.4736	441350	0.144869		3.16832		0.0297363	0.203688
MV24-1_L_110	sweeps 35-41	245.215	103.661	1.17925	0.422736	1820.15	263.517	12.6489		0.00165772	24.819	0.0274982	17.5329	0.00390882	6.47827	0.369492	255.832	6.47827	0.051022	16.2922	33.4783	8.30212	8.35597	241.796	375.483	375.612	27.5442	4.76438	4.78094	25.1488	1.62603	1.66352	89.5992	8.69672	16.1653	27.5961	1.6388	24.5676	1074.69	204.186	8.7293	641.026	392852	2.21196	0.356228	8.7798	0.251632	3.25789	4.39062
MV24-1_M_165	Sweeps 23-41	282.879	145.964	1.65952	0.515994	1375.54	86.5293	3.00013		0.00159882	12.1722	0.0315425	11.4987	0.00476301	6.402	0.553451	209.951	6.402	0.0480302	9.55166	32.2898	3.92725	4.08884	100.768	225.911	226.513	31.533	3.57016	3.61942	30.6314	1.95637	2.03101	69.6021	2.85917	68.1765	31.8622	1.96234	30.8192	1485.18	230.057	4.79488	1379.86	392931	1.52927	0.0185843	7.43861	0.252279	4.70626	8.78086
MV24-1_S_454	Sweeps 23-41	212.182	75.0568	1.88241	0.353739	850.598	339.288	14.858		0.0029628	25.3747	0.0797639	17.2704	0.00724512	7.38186	0.427429	138.024	7.38186	0.0798472	15.6133	59.7961	15.1506	15.2506	1193.22	308.095	308.327	77.923	12.9542	13.0324	46.5367	3.4229	3.52337	96.0999	40.2786	1.04709	78.5734	3.3546	45.7737	1109.15	165.417	7.92737	541.205	445700	0.836941	0.065093	9.77481	0.08935	0.556625	1.83583
MV24-1_M_136	sweeps 35-41	365.799	315.017	3.58577	0.861175	4876.8	347.095	15.0949		0.00211924	9.57963	0.0476502	11.3046	0.00763194	5.99793	0.530576	131.028	5.99793	0.0452824	9.58216	42.7891	4.0947	4.2771	-40.4337	232.76	232.999	47.2659	5.22074	5.2654	49.0118	2.92855	3.00912	221.215	-3.69389	697.822	47.2286	2.95122	49.961	2557.34	296.072	7.84156	2082.27	443510	1.48501	0.0843519	20.9401	0.574183	8.35667	14.115
MV24-1_S_455	Sweeps 23-41	1579.23	240.643	16.1162	0.15238	13439	652.126	42.4457		0.0034067	6.41858	0.0586783	5.93163	0.00926037	2.32411	0.391817	107.987	2.32411	0.0459566	5.45736	68.7397	4.40462	4.83912	-4.65503	131.662	132.469	57.8984	3.33824	3.50552	59.4215	1.37468	1.73959	1376.5	-2.63058	36104.4	57.8662	1.39183	59.1983	452.514	553.61	3.22231	2193.17	444609	10.9406		28.2382	0.0290183	0.892369	2.69337
MV24-1_L_91	sweeps 23-35	93.9415	50.6104	1.32675	0.538744	2376.85	64.0186	1.61818		0.00405195	11.3014	0.0783919	9.24058	0.0113716	2.50323	0.270895	87.9381	2.50323	0.0499974	8.89506	81.733	9.21829	9.43752	194.837	206.764	206.977	76.6319	6.82062	6.95841	72.8926	1.81439	2.24429	62.588	4.87963	39.713	76.7097	1.85652	72.0971	1554.29	160.464	8.5411	634.73	448183	0.429225	0.0167567	9.3918	0.176928	2.52874	5.15829
MV24-1_M_166	Sweeps 23-41	475.468	102.934	6.65971	0.216489	6181.65	156.673	10.8029		0.00463838	12.2565	0.0847611	7.88104	0.0122695	5.41473	0.681351	81.5026	5.41473	0.0501034	5.72639	93.5349	11.4376	11.9011	199.764	132.988	133.973	82.6114	6.25282	6.43488	78.6133	4.23084	4.45454	60.6469	4.83965	26.284	83.4217	4.23332	78.8429	556.66	145.059	1.51004	477.419	382727	2.91407	0.0159333	11.4589	0.028809	0.611831	1.73722
MV24-1_M_135	sweeps 23-41	254.816	215.432	4.22969	0.845444	6362.28	352.942	10.9339		0.00403004	7.92361	0.0843901	8.41911	0.0125798	4.60126	0.546526	79.4926	4.60126	0.0486538	7.05052	81.292	6.42833	6.62155	131.182	165.817	165.957	82.264	6.65276	6.80726	80.5886	3.68501	3.95746	38.5673	2.03651	77.703	82.2986	3.70337	80.4841	660.837	311.945	5.1486	1330.71	497041	5.21269	0.273125	30.8494	0.207298	2.31088	4.05114
MV24-1_M_151	sweeps 23-36	357.549	92.3157	5.43596	0.25819	5134.81	935.602	24.1446		0.00430647	14.2474	0.0850308	13.1188	0.0133574	5.67146	0.429311	74.8651	5.67146	0.0461695	11.8295	86.8561	12.3482	12.8471	6.468	284.794	285.249	82.8638	10.439	10.5595	85.537	4.81916	5.07819	-1222.47	-3.22606	58229.9	83.4761	4.87614	86.2262	673.038	178.942	3.97672	560.235	450879	4.4885	0.0073833	16.0776	0.0352688	1.00884	2.27625
MV24-1_L_89	sweeps 23-41	187.022	104.284	3.06085	0.557604	5306.97	209.225	9.03498		0.00411674	7.89167	0.0923593	6.87457	0.0134009	3.85767	0.561151	74.622	3.85767	0.0499857	5.69018	83.0373	6.53959	6.74486	194.317	132.278	132.448	89.6988	5.90189	6.11062	85.8139	3.28848	3.63677	55.8381	4.33101	30.1102	89.7787	3.29917	86.0727	1540.93	158.086	4.53395	500.113	456004	0.704072	0.0393863	5.89174	0.122293	1.88059	3.24592
MV24-1_M_139	sweeps 23-41	535.487	98.1258	8.09383	0.183246	14284.7	845.818	17.3782		0.00530821	7.34227	0.0926083	4.51808	0.0134705	3.33135	0.737339	74.2362	3.33135	0.0498614	3.05207	107.007	7.83596	8.10783	188.527	71.0259	71.3475	89.9303	3.88838	4.19226	86.2568	2.85438	3.24334	54.2468	4.08475	17.3035	90.0058	2.85661	85.6584	450.759	206.803	3.59015	954.815	475113	2.99541	0.189432	9.7402	0.394986	5.75719	7.62529
MV24-1_M_172	Sweeps 23-41	997.147	705.053	17.6028	0.70707	14690.1	3232.76	90.8673		0.00480657	4.74278	0.0892217	5.7669	0.0134977	3.15656	0.533974	74.0868	3.15656	0.0479414	4.82632	96.9183	4.58562	5.70258	96.3914	114.243	115.431	86.7781	4.79653	5.05391	86.4296	2.70999	3.11227	10.3348	0.401645	106.308	87.4301	2.72672	85.9048	1964.06	359.202	9.5166	2232.08	395264	3.19775	0.30027	39.6944	0.400784	5.52064	11.1417
MV24-1_L_114	sweeps 23-30	597.325	290.486	10.1122	0.486312	17848.9	17848.9	1548.41		0.00523324	5.93163	0.0937269	8.61911	0.0137044	6.3047	0.731479	72.9692	6.3047	0.0496024	5.87706	105.499	6.24152	6.90338	176.416	137.07	137.184	90.9692	7.49977	7.71804	87.7444	5.49455	5.78606	50.2628	3.54491	38.7695	91.0355	5.50152	86.3177	1244.61	137.785	4.81486	708.224	449939	1.00779	0.189987	20.2675	0.123144	2.44326	4.2439
MV24-1_L_122	sweeps 23-41	203.462	95.6995	3.3944	0.470356	5322.68	304.674	12.3698		0.00495568	5.34166	0.0892915	7.78634	0.0137047	4.86646	0.625	72.9676	4.86646	0.047254	6.07821	99.9175	5.32409	5.67358	62.1275	144.8	144.964	86.8431	6.48081	6.65761	87.7464	4.24121	4.52448	-41.2359	-1.04006	329.247	86.8245	4.26555	86.8031	1044.89	197.067	6.54824	494.597	437756	1.82549		16.4462	0.0287391	0.547628	1.76933
MV24-1_L_119	sweeps 23-41	175.675	104.11	3.10212	0.592633	5105.42	863.06	60.9716		0.00499796	9.91433	0.0913043	6.98019	0.0140342	3.84266	0.55051	71.2545	3.84266	0.0471848	5.82726	100.768	9.9656	10.1608	58.6201	138.914	139.085	88.7176	5.92983	6.13109	89.8413	3.42835	3.79003	-53.2604	-1.26657	363.232	88.6945	3.45324	88.7528	1732.09	185.4	14.0216	827.546	425573	0.603389		8.91121	0.0761883	1.49332	4.39161
MV24-1_L_105	sweeps 23-41	433.747	199.865	7.43512	0.460786	12804.5	541.946	25.2523		0.00509499	7.38777	0.0960414	6.33853	0.0140973	4.61429	0.727974	70.9353	4.61429	0.0494105	4.34573	102.719	7.56941	7.8373	167.332	101.526	101.749	93.1156	5.63962	5.87245	90.2427	4.13505	4.44418	46.0697	3.0853	32.8144	93.1746	4.14208	89.2973	1241.81	174.724	4.41465	867.871	434058	4.30804	0.388844	26.342	0.110993	1.26664	2.48025
MV24-1_M_142	sweeps 23-41	737.303	579.878	13.6393	0.786485	20657.8	4268.38	170.391		0.00446525	5.14592	0.0958803	6.27777	0.0142917	3.84271	0.612114	69.9709	3.84271	0.048657	4.96426	90.0515	4.62367	4.94398	131.324	116.749	116.949	92.9664	5.57701	5.80642	91.4778	3.4904	3.85269	30.3417	1.60116	61.9844	92.9969	3.50535	91.6726		573.68	5.1379	2061.55	485885	2.31175	0.0136493	39.5119	0.207815	4.20712	8.57067
MV24-1_L_103	sweeps 30-41	153.705	88.4446	2.7426	0.575419	4455.09	2874.13	131.545		0.00459137	12.4461	0.099179	9.78149	0.014482	5.3352	0.545438	69.051	5.3352	0.0496694	8.19837	92.5891	11.4974	11.7065	179.548	191.101	191.258	96.0183	8.96162	9.05711	92.6877	4.90969	5.07423	48.3772	3.46865	55.0124	96.0864	4.93114	92.6972	1785.35	191.934	14.5675	465.207	423746	0.796923	0.00579304	9.62563	0.0267644	1.02052	2.30458
MV24-1_M_160	Sweeps 23-41	1060.15	465.71	18.7607	0.439287	15835	8279.63	433.475		0.00485719	5.28527	0.0935167	6.52132	0.0147674	3.92651	0.592598	67.7169	3.92651	0.0459288	5.20674	97.9367	5.1637	6.21773	-6.09348	125.649	126.773	90.7741	5.66278	5.90109	94.5004	3.6835	4.04428	1650.84	-4.10507	31978.9	91.3535	3.71377	95.0145	1164.42	256.091	2.81137	2053.75	443978	3.65098		25.4682	0.184346	3.12205	7.72447
MV24-1_S_456	Sweeps 23-35	826.08	336.679	14.5114	0.407562	7397.28	711.142	56.1583		0.00472806	10.1785	0.106774	6.8275	0.0148652	3.68086	0.539123	67.2713	3.68086	0.0520947	5.75031	95.3389	9.68127	10.3056	289.563	131.39	132.136	103.01	6.68803	6.97036	95.1218	3.4756	3.91496	67.1498	7.6577	14.9541	103.17	3.48122	95.1074	726.728	230.558	6.85022	1101.78	453501	1.33315		26.4244	0.0929315	1.57765	4.02088
MV24-1_M_141	sweeps 23-41	23.0578	12.6978	0.424895	0.550693	619.722	23.9079	2.9421		0.00489029	22.9581	0.0922739	30.6753	0.0150651	8.33724	0.27179	66.3784	8.33724	0.0444226	29.5206	98.6025	22.5822	22.6634	-87.2107	723.563	723.598	89.6194	26.3127	26.359	96.3919	7.97664	8.15967	210.528	-7.55694	917.061	89.48	8.19268	96.1889		218.776	12.9979	361.323	492563	0.779373		5.29523	0.0703106	1.21437	2.5386
MV24-1_M_128	sweeps 23-41	854.937	321.826	15.0565	0.376433	25847.5	2941.6	117.597		0.00473204	6.16963	0.0994422	6.11145	0.0151087	4.92502	0.805868	66.1872	4.92502	0.0477357	3.61856	95.4191	5.87313	6.16313	86.1695	85.8191	86.0941	96.2613	5.61271	5.85851	96.6683	4.72541	5.03287	-12.1839	-0.4228	111.862	96.253	4.74312	96.7445	1029.47	201.433	1.96277	1091.39	480036	4.71139	0.0100104	21.1651	0.0401701	0.842747	2.77304
MV24-1_L_98	sweeps 23-41	118.709	63.4	2.2976	0.534079	3939.07	165.151	6.13326		0.00538545	7.32059	0.105535	10.3997	0.0157132	5.90414	0.56772	63.6407	5.90414	0.0487113	8.5613	108.559	7.92589	8.21254	133.999	201.239	201.353	101.873	10.0804	10.2372	100.506	5.88801	6.16117	24.9947	1.34128	112.728	101.901	5.92052	99.7916	1474.94	247.35	17.108	626.85	428446	0.881828		11.1907	0.0874581	1.50472	3.3944
MV24-1_M_144	sweeps 23-41	139.044	84.8507	2.75124	0.610243	4527.22	150.673	7.79792		0.00465956	7.8348	0.113874	7.6094	0.0161174	6.14375	0.807389	62.0446	6.14375	0.051242	4.4897	93.9609	7.34457	7.56787	251.766	103.284	103.501	109.503	7.89892	8.12122	103.071	6.28208	6.54456	59.0608	5.87336	16.9792	109.633	6.27631	104.006	6.98016
MV24-1_M_129	sweeps 23-30	538.745	357.594	11.1885	0.663754	17863.9	15750.8	663.05		0.00518285	7.68026	0.11217	10.9811	0.0165141	8.22858	0.749343	60.5544	8.22858	0.0492631	7.27147	104.486	8.00409	8.51174	160.404	170.09	170.183	107.949	11.2455	11.4445	105.587	8.61755	8.88368	34.1744	2.18761	70.0069	107.996	8.63932	105.711	1727.09	477.497	5.4073	1701.74	558017	2.37327	5.52479	37.6572	1.87223	9.52123	6.03714
MV24-1_L_90	sweeps 23-41	455.274	207.061	9.01675	0.454805	16213	1153.94	45.6159		0.0053336	3.13752	0.114751	5.49319	0.0165471	3.20294	0.583075	60.4335	3.20294	0.0502959	4.46276	107.517	3.36441	3.9854	208.705	103.471	103.687	110.302	5.7416	6.05657	105.797	3.36095	3.86653	49.3081	4.08465	25.1835	110.393	3.37244	105.668	1173.11
MV24-1_L_118	sweeps 23-41	87.5087	43.9606	1.78913	0.502356	3027.98	3393.97	253.723		0.00594274	15.8502	0.107674	11.6813	0.0166788	3.88619	0.332685	59.9562	3.88619	0.0468213	11.0159	119.76	18.926	19.072	40.0873	263.528	263.619	103.835	11.5297	11.671	106.632	4.10983	4.53437	-165.999	-2.69315	1748.67	103.779	4.18635	105.543	1420.47
MV24-1_M_127	sweeps 35-41	161.161	10.516	2.90276	0.0652513	4828.23	243.201	15.3452		0.00681424	35.3582	0.114828	22.0294	0.0167341	3.52912	0.1602	59.7583	3.52912	0.0497673	21.7449	137.263	48.3694	48.5279	184.182	506.426	506.526	110.372	23.0395	23.0909	106.982	3.74437	4.03166	41.915	3.07137	159.723	110.441	4.01684	106.678	169.682	181.723	1.40028	616.054	424731	3.86857		3.7187		0.132421	0.715145
MV24-1_L_79	sweeps 23-41	195.073	74.3061	3.87523	0.380915	6543.19	298.162	6.3638		0.00584894	7.88947	0.112464	7.964	0.016822	4.95866	0.622634	59.4461	4.95866	0.0484882	6.23193	117.875	9.27266	9.56504	123.142	146.784	146.941	108.217	8.17502	8.39171	107.539	5.28827	5.6344	12.6703	0.626214	104.185	108.231	5.31592	106.902	981.909	186.74	7.62176	574.194	467960	0.851348		9.35839	0.0365146	0.626165	1.37598
MV24-1_L_86	sweeps 23-30	445.447	232.915	9.09995	0.522879	16993.3	640.044	36.4926		0.00510194	8.94738	0.115482	8.85466	0.0169236	5.09985	0.575951	59.0893	5.09985	0.0494903	7.23854	102.859	9.17981	9.63116	171.108	168.991	169.082	110.967	9.3079	9.56989	108.183	5.47115	5.91771	36.7747	2.50881	62.5249	111.024	5.49714	108.644	1838.75	182.799	6.88093	960.857	506959	1.85822	0.216384	13.9443	0.130375	1.39117	3.22744
MV24-1_L_101	sweeps 23-41	509.4	211.46	10.2338	0.415116	18874.4	5356.48	117.829		0.00554715	4.1726	0.115869	5.35711	0.0169468	3.64513	0.680428	59.0081	3.64513	0.0495882	3.92577	111.81	4.6525	5.15214	175.732	91.5726	91.8194	111.32	5.64827	5.97253	108.331	3.91581	4.376	38.3544	2.68536	32.2003	111.381	3.92739	108.096	981.829	219.732	4.14983	910.13	431441	5.07875	0.0124659	21.9684	0.05436	0.644568	1.91903
MV24-1_M_149	Sweeps 23-41	1022.24	390.588	20.7469	0.382089	17808.8	599.963	12.5617		0.00545916	4.36032	0.116937	5.5142	0.0172306	2.95321	0.520654	58.0364	2.95321	0.0492209	4.65671	110.041	4.78511	6.21659	158.367	108.97	110.183	112.291	5.86185	6.20273	110.129	3.22472	3.76284	30.4593	1.92511	47.8933	113.104	3.24443	110.974	944.862	224.539	3.53302	1462.04	447839	2.07495	0.0470083	12.7083	0.14712	2.44642	4.543
MV24-1_M_155	Sweeps 23-41	354.316	182.061	7.51308	0.513837	6473.63	209.771	6.59968		0.0053883	5.66859	0.117586	6.34072	0.0174162	2.783	0.425134	57.4177	2.783	0.0489666	5.69734	108.617	6.14052	7.26656	146.247	133.619	134.615	112.881	6.77397	7.07529	111.306	3.07105	3.64578	23.8917	1.39559	69.5683	113.887	3.10113	112.626	1380.63	274.753	6.45708	1777.64	458850	0.848977	0.0180481	9.57652	0.158503	2.81216	7.01628
MV24-1_L_121	sweeps 23-41	507.307	181.452	10.4701	0.357678	18067.7	1083.08	34.5211		0.00597036	5.72586	0.116728	5.65566	0.0176566	4.06925	0.7195	56.6361	4.06925	0.0479477	3.92782	120.315	6.8686	7.26286	96.6792	92.9705	93.2227	112.101	6.00263	6.30954	112.828	4.55132	4.98057	-16.7039	-0.648527	112.326	112.087	4.57447	112.397	990.822	170.035	4.11172	546.577	460769	0.626005		6.89736	0.0174264	0.568511	1.40035
MV24-1_L_77	sweeps 23-41	50.8236	15.4986	1.0285	0.304948	1719.65	103.086	3.86351		0.0048014	27.5939	0.122496	11.9809	0.017884	6.70563	0.559692	55.916	6.70563	0.049677	9.92861	96.8144	26.651	26.7207	179.873	231.422	231.519	117.332	13.2757	13.4323	114.269	7.59493	7.87071	36.4726	2.61079	81.8424	117.394	7.6343	115.118	811.71	248.049	7.81152	854.505	481204	0.520782		3.72809	0.0118115	0.482344	1.85851
MV24-1_L_81	sweeps 23-41	107.201	52.866	2.30773	0.493146	3821.88	229.107	8.13413		0.00574169	10.1145	0.10217	14.9909	0.0179545	6.41724	0.428075	55.6963	6.41724	0.0412715	13.548	115.72	11.6711	11.8962	-270.824	344.26	344.338	98.7778	14.1103	14.2168	114.715	7.29645	7.58515	142.358	-16.1348	53.9111	98.452	7.43896	114.634	1365.08	205.035	9.64888	523.672	455972	1.24762		10.969	0.0225182	0.635234	1.80661
MV24-1_M_132	sweeps 23-41	448.914	175.1	9.53308	0.390052	15053	822.876	66.8075		0.0056149	8.0293	0.127061	10.4305	0.0181242	9.26326	0.88809	55.1748	9.26326	0.0508455	4.7946	113.172	9.0615	9.32746	233.841	110.658	110.861	121.454	11.9399	12.1216	115.79	10.6302	10.8297	50.4834	4.66306	23.8691	121.567	10.6277	115.955	869.567	317.622	6.29772	2207.02	475090	2.72223		11.1	0.0472949	1.1293	3.52756
MV24-1_L_84	sweeps 23-41	110.977	45.2924	2.41545	0.408126	4310.15	4831.12	195.072		0.00560163	12.8636	0.126036	6.23006	0.0185651	3.50094	0.561943	53.8645	3.50094	0.0492375	5.15335	112.905	14.4831	14.6563	159.175	120.572	120.76	120.529	7.0805	7.38453	118.581	4.1135	4.63756	25.5028	1.61664	56.4895	120.569	4.138	118.957	999.15	247.348	10.7806	661.644	452221	0.643576	0.380049	6.63963	0.173312	1.37845	1.98967
MV24-1_L_107	sweeps 23-41	224.857	40.4639	5.26482	0.179954	6818.42	353.039	15.9232		0.0168549	7.39709	0.216233	8.53834	0.0188127	6.10127	0.714573	53.1557	6.10127	0.0833624	5.97309	337.834	24.7822	25.6541	1277.71	116.446	116.582	198.77	15.4138	15.7669	120.148	7.26264	7.57731	90.5967	39.5544	1.02835	200.235	6.95176	113.983	442.531
MV24-1_M_152	Sweeps 23-29					-5442.03	-655.389	114.496		0.00737748	4.95001	0.141886	41.5783	0.0188275	30.571	0.735025	53.1138	30.571	0.0546572	28.181	148.567	7.32714	11.1727	398.254	631.609	631.85	134.723	52.4583	52.5526	120.241	36.4183	36.5275	69.8078	10.749	48.7485	137.245	36.2585								-0.112983
MV24-1_M_157	Sweeps 23-41	208.08	111.208	4.85463	0.534447	4354.37	245.979	5.86443		0.00610884	9.16468	0.127526	6.27627	0.0189524	3.51047	0.548288	52.7637	3.51047	0.0488013	5.20271	123.097	11.2472	12.0739	138.319	122.197	123.289	121.872	7.20781	7.53525	121.032	4.20915	4.72018	12.4982	0.689348	77.3623	122.976	4.23735	122.086	1361.44	211.498	7.36271	789.071	451667	0.728792	0.0256315	13.8852	0.0841208	1.83727	4.26824
MV24-1_M_125	sweeps 23-41	79.3705	67.0206	1.94285	0.844402	2701.58	92.7429	3.05912		0.00546929	10.909	0.116763	6.80422	0.0190131	5.74859	0.844857	52.5952	5.74859	0.0445399	3.64021	110.245	11.9938	12.1868	-80.7493	89.1118	89.3936	112.133	7.22357	7.4802	121.416	6.91439	7.24783	250.362	-8.27859	166.154	111.945	6.98132	123.062	2377.6	174.405	11.3202	454.624	510129	0.700029	0.0483703	5.65236	0.69898	9.64922	14.1202
MV24-1_M_168	Sweeps 23-41	70.8019	21.5596	1.61442	0.304505	1484.01	40.2428	0.853853		0.0073166	16.5743	0.129714	10.8505	0.0194304	4.19366	0.381142	51.4657	4.19366	0.0484177	10.0073	147.346	24.3327	24.8748	119.725	235.857	236.43	123.841	12.6502	12.8462	124.055	5.15272	5.6004	-3.61633	-0.172993	204.168	124.995	5.22479	124.206	757.763	140.423	5.4597	264.431	409618	0.21618		4.01134	0.00877383	0.0653596	0.747202
MV24-1_L_116	sweeps 23-41	94.7194	84.0065	2.53275	0.886898	3549.5	114.351	5.0279		0.00685754	6.52673	0.123844	10.4906	0.0197594	6.15562	0.586774	50.6089	6.15562	0.0454571	8.49478	138.132	8.9848	9.38666	-31.0844	205.977	206.096	118.551	11.7382	11.9164	126.135	7.68892	8.0152	505.782	-6.39707	2688.97	118.399	7.77407	124.264	2810.93	228.686	9.20109	894.071	402718	0.83094	0.0129163	12.9805	0.251538	4.02309	7.11345
MV24-1_M_156	Sweeps 23-41	271.747	100.629	6.32691	0.370304	4954.69	148.259	2.70882		0.00601342	11.2028	0.146578	8.38982	0.0197969	3.6249	0.424066	50.513	3.6249	0.0536997	7.56632	121.18	13.535	14.2102	358.469	170.776	171.499	138.886	10.8905	11.17	126.372	4.53626	5.0543	64.7468	9.0104	16.8423	140.35	4.56148	127.925	635.677	140.424	5.59401	1156.64	447385	0.537787		4.28043	0.0186627	0.70503	2.91366
MV24-1_M_159	Sweeps 23-41	191.181	51.8519	4.4588	0.271219	3623.54	108.191	2.97562		0.00757333	14.391	0.147044	8.00932	0.0199997	3.05848	0.37193	50.0007	3.05848	0.0533238	7.40236	152.496	21.8632	22.5182	342.633	167.541	168.284	139.298	10.4254	10.7192	127.654	3.86587	4.47499	62.7432	8.35909	18.2527	140.777	3.90255	127.851	703.78	236.592	9.98971	831.857	447550	0.823647		2.66243	0.0491309	0.70695	2.39276
MV24-1_M_146	Sweeps 23-41	338.614	85.518	7.71051	0.252553	6820.45	209.448	2.55876		0.00617964	10.2447	0.131553	8.58631	0.0200654	3.50104	0.399675	49.837	3.50104	0.0475501	7.84012	124.519	12.7174	13.493	76.9374	186.259	186.993	125.492	10.1359	10.3837	128.069	4.43951	4.97942	-66.4591	-2.05348	403.026	126.509	4.50128	129.406	699.076	222.94	5.99772	1287.13	439030	1.39685		2.93471	0.0908644	1.15221	3.09499
MV24-1_M_170	Sweeps 23-41	94.9156	35.4758	2.29707	0.373762	2111.15	140.084	3.94812		0.00771875	12.5748	0.139311	10.6011	0.0200979	6.23861	0.584804	49.7565	6.23861	0.0502729	8.57107	155.413	19.468	20.2129	207.633	198.764	199.422	132.43	13.1621	13.3756	128.275	7.92346	8.24172	38.2206	3.13782	59.2635	133.734	7.95917	127.965	1150.92	133.429	5.85341	563.876	385328	0.548356		8.66593	0.031622	0.895954	2.40163
MV24-1_M_158	Sweeps 23-41	132.385	41.3887	3.1049	0.31264	2621.97	71.5309	0.88791		0.005993	12.8198	0.141025	9.12836	0.0203485	3.2718	0.350279	49.1437	3.2718	0.0502648	8.52187	120.77	15.4364	16.0248	207.264	197.637	198.297	133.957	11.4558	11.7049	129.858	4.20618	4.78978	37.3465	3.05979	59.7777	135.262	4.26746	131.629	890.244	170.256	5.62142	288.193	447341	0.242521		5.47271	0.0428289	0.34157	0.925217
MV24-1_L_96	sweeps 23-41	162.699	32.0035	3.716	0.196704	6942.88	234.968	9.09673		0.00711284	9.574	0.141474	8.35229	0.0204146	5.13629	0.614956	48.9846	5.13629	0.0502613	6.5863	143.257	13.6669	13.9583	207.108	152.751	152.897	134.356	10.511	10.7637	130.276	6.62418	7.02759	37.0978	3.03669	46.5032	134.436	6.65199	129.876	490.292	251.876	10.728	611.545	437377	0.670834	0.00319452	1.02223	0.0116341	0.660709	1.53998
MV24-1_L_94	sweeps 23-41	116.712	51.6097	2.86313	0.442195	4958.82	805.601	31.8956		0.00694593	6.57781	0.143979	7.63955	0.0204158	3.49075	0.456931	48.9816	3.49075	0.0511482	6.7954	139.907	9.17103	9.58097	247.538	156.447	156.587	136.582	9.76289	10.0429	130.283	4.50222	5.07747	47.3684	4.61119	33.3134	136.706	4.53566	129.59	1191.24	164.605	7.28287	484.267	453159	0.229314	0.00655221	5.84971	0.0904785	1.27546	2.26853
MV24-1_L_80	sweeps 23-41	217.399	87.5937	5.3357	0.402917	9017.86	466.923	45.277		0.00714704	9.13935	0.148075	7.96605	0.0205898	5.9605	0.748238	48.5678	5.9605	0.0521591	5.28493	143.943	13.1087	13.4178	292.367	120.696	120.875	140.211	10.4324	10.7088	131.382	7.75178	8.10627	55.0626	6.29682	18.7398	140.385	7.75005	130.563	1076.27	150.611	1.54838	675.76	442329	5.55647		28.2423	0.0161855	0.447269	1.50385
MV24-1_M_153	Sweeps 23-41	118.601	45.7421	2.85849	0.385682	2580.57	64.5468	0.78621		0.00589373	9.64328	0.133309	10.9252	0.0206506	4.6227	0.418311	48.4248	4.6227	0.0468192	9.89903	118.775	11.4202	12.1885	39.9918	236.813	237.4	127.066	13.0488	13.2472	131.766	6.02934	6.46144	-229.483	-3.69886	1951.11	128.137	6.11505	133.928	963.952	201.103	5.99672	953.738	448787	0.497125		4.56546	0.0540387	0.84557	3.96128
MV24-1_L_106	sweeps 23-41	133.596	57.9868	3.30709	0.434047	5820.6	509.743	6.2694		0.00712675	5.74388	0.134183	10.0686	0.020688	7.00336	0.695567	48.3373	7.00336	0.0470413	7.23387	143.536	8.21533	8.68972	51.345	172.682	172.819	127.85	12.0952	12.2952	132.002	9.15059	9.45313	-157.089	-3.24814	864.819	127.767	9.22178	131.188	1279.96	244.026	13.5932	686.965	425381	0.514162		11.8613	0.0532425	1.63294	3.32323
MV24-1_L_93	sweeps 23-41	351.301	112.519	8.47521	0.320293	15414.6	1221.53	65.9519		0.00716916	6.52641	0.149186	7.48581	0.020747	4.82123	0.64405	48.1998	4.82123	0.052152	5.72652	144.387	9.38972	9.81613	292.064	130.788	130.953	141.193	9.86746	10.1621	132.375	6.31703	6.7523	54.676	6.2451	20.4112	141.366	6.32458	131.761	401.322	212.435	4.90407	829.734	428677	1.06569	0.242341	12.3177	0.374049	2.90515	3.37607
MV24-1_M_167	Sweeps 23-41	245.462	69.116	5.9779	0.281575	4916.11	126.85	8.48587		0.00814577	9.81584	0.145488	9.32598	0.0207997	4.48743	0.475355	48.0775	4.48743	0.0507303	8.17538	163.977	16.0306	17.0307	228.61	188.865	189.552	137.92	12.0271	12.2783	132.708	5.89431	6.34327	41.9498	3.77875	48.0271	139.232	5.93619	132.598	693.199	269.819	9.73178	1031.08	409654	0.603735		2.22302	0.103992	1.44704	3.53262
MV24-1_M_134	sweeps 23-41	192.936	69.2047	4.7272	0.358693	7778.96	260.262	5.05986		0.00703994	11.2218	0.13767	7.77971	0.0209778	5.35845	0.688772	47.6695	5.35845	0.047597	5.64012	141.794	15.8562	16.0957	79.3105	133.932	134.109	130.967	9.5591	9.81874	133.832	7.09741	7.48812	-68.7449	-2.18821	285.101	130.91	7.14824	133.374	938.325	183.298	4.41735	526.364	484385	1.06381		7.36125	0.0279903	0.408899	1.45581
MV24-1_M_124	sweeps 23-41	120.002	55.228	3.01005	0.460227	4612.44	524.915	11.4766		0.00655326	7.19793	0.132237	7.85301	0.0211083	3.54408	0.451302	47.3746	3.54408	0.0454357	7.0078	132.023	9.47198	9.81878	-32.2257	169.959	170.104	126.106	9.31283	9.5624	134.657	4.72285	5.3014	517.856	-6.781	2203.82	125.935	4.79334	134.855	1254.26	223.914	7.95723	989.049	492133	0.472729	0.0176079	5.17786	0.0723201	1.25708	3.79053
MV24-1_L_76	sweeps 23-41	64.8601	16.8384	1.55976	0.259611	2687.03	305.797	9.30118		0.00595448	9.59663	0.141978	10.437	0.0214724	5.27455	0.505371	46.5714	5.27455	0.0479555	9.00609	119.996	11.4815	11.7276	97.0576	213.157	213.266	134.804	13.1755	13.38	136.955	7.14756	7.56263	-41.1068	-1.59567	309.985	134.761	7.2199	137.65	684.887	261.496	7.94819	553.895	480031	0.536635		2.76014	0.0148317	0.26897	1.39804
MV24-1_M_140	sweeps 23-41	252.323	103.173	6.48414	0.408892	10448.1	10448.1	1032.32		0.00703537	7.20579	0.145959	7.72568	0.0217624	4.68713	0.606695	45.9507	4.68713	0.0486431	6.14141	141.702	10.175	10.541	130.63	144.453	144.614	138.337	9.99142	10.265	138.785	6.43551	6.89219	-6.24267	-0.323571	117.588	138.329	6.48112	138.592	1031.44	175.692	3.68853	556.18	478929	0.399315	0.0161961	8.03669	0.0504643	0.81315	1.85909
MV24-1_L_112	sweeps 23-41	129.917	44.6302	3.33464	0.343528	5758.68	6454.92	230.644		0.00811029	9.20676	0.142492	8.8078	0.0218479	5.18892	0.589127	45.7711	5.18892	0.0473021	7.11706	163.265	14.9709	15.3119	64.5113	169.475	169.614	135.261	11.1541	11.394	139.324	7.15183	7.57612	-115.968	-3.00363	567.469	135.181	7.21833	138.006	955.586	160.122	8.01165	589.34	395918	0.548406		5.23208	0.0104038	0.457423	1.68928
MV24-1_L_111	sweeps 23-41	126.95	36.5	3.2017	0.287514	6088.25	753.235	26.5042		0.00776188	6.49545	0.149528	9.8017	0.021904	3.72391	0.379925	45.6539	3.72391	0.0495105	9.06674	156.279	10.1119	10.5698	172.087	211.631	211.739	141.495	12.9459	13.1713	139.678	5.14553	5.72358	18.833	1.28407	99.8634	141.53	5.21796	138.92	798.683	180.221	7.75296	493.073	376856	0.525431		5.16952	0.0124061	0.30345	1.31152
MV24-1_L_117	sweeps 23-41	38.5833	18.3663	1.03594	0.476018	1743.68	79.4566	2.50794		0.00704749	14.135	0.171028	12.1851	0.0222544	7.10261	0.582894	44.9349	7.10261	0.0557379	9.90098	141.945	19.9937	20.1875	441.962	220.222	220.316	160.311	18.07	18.2737	141.888	9.96766	10.2869	67.8958	11.4919	16.1551	160.667	9.94753	141.884	1358.9	188.943	6.23445	1096.83	435158	0.143953		2.99274	0.0219338	0.817323	3.11584
MV24-1_L_87	sweeps 23-41	195.548	54.8532	4.94429	0.28051	8793.12	8793.12	210.057		0.00678906	6.0014	0.15258	7.63848	0.0222733	4.94751	0.647709	44.8969	4.94751	0.0496834	5.81967	136.758	8.17968	8.61919	180.183	135.64	135.806	144.187	10.2675	10.5626	142.007	6.949	7.40532	21.1871	1.51187	59.4549	144.23	6.9849	142.24	821.345	148.138	3.46508	412.112	458938	0.302813		4.77318	0.00874477	0.270407	0.650994
MV24-1_L_92	sweeps 23-41	318.324	218.036	9.07731	0.684951	14769.1	2399.37	123.884		0.00728442	5.34547	0.153626	6.8537	0.0224122	5.28505	0.771124	44.6185	5.28505	0.049714	4.36365	146.7	7.81343	8.33708	181.645	101.676	101.897	145.109	9.26734	9.59662	142.883	7.46838	7.89906	21.3392	1.5335	44.222	145.152	7.49674	142.441	1511.47	401.97	11.485	3499.64	438006	1.539	0.0263447	14.3768	0.272768	5.33719	10.9709
MV24-1_M_131	sweeps 30-41	271.411	137.446	7.33355	0.506412	11705.5	335.559	5.96223		0.0068092	6.98263	0.152194	6.02057	0.022468	3.32497	0.552268	44.5078	3.32497	0.0491285	5.01915	137.162	9.5451	10.0767	153.98	117.545	117.807	143.848	8.07496	8.30068	143.235	4.70999	5.10703	6.97862	0.426089	71.0763	143.86	4.74646	143.74	1210.62	300.849	4.54093	1263.84	448560	4.08552	0.0424855	21.0373	0.0927064	1.75822	2.36292
MV24-1_L_120	sweeps 23-41	75.4767	31.4959	2.02231	0.417293	3578.53	186.713	5.81741		0.00760613	9.87416	0.15636	9.59415	0.0224858	4.80075	0.500384	44.4726	4.80075	0.0504331	8.30665	153.154	15.0656	15.3628	215.008	192.373	192.49	147.512	13.1725	13.4109	143.347	6.80578	7.27374	33.3295	2.82323	59.7358	147.593	6.85627	142.684	414.402	212.036	8.09849	1468.88	435788	0.365249	0.0303365	10.0371	0.190482	3.92205	7.00156
MV24-1_M_164	Sweeps 23-41	342.55	188.97	9.6317	0.551658	8051.47	393.476	18.1667		0.00768403	7.31177	0.154103	8.55727	0.0225513	4.45653	0.514404	44.3434	4.45653	0.0495608	7.30521	154.717	11.2694	12.5145	174.43	170.443	171.219	145.528	11.602	11.8888	143.76	6.3358	6.82406	17.583	1.21495	80.6152	146.762	6.38617	144.134	1300.48	200.313	1.85829	1219.15	389143	1.58032	0.00567213	23.8352	0.0552279	1.33106	4.20782
MV24-1_M_143	sweeps 23-41	307.966	258.777	9.14507	0.840279	14597.7	435.03	29.7097		0.00709043	2.34187	0.155108	6.12081	0.0226122	4.797	0.783719	44.2239	4.797	0.0497497	3.80173	142.807	3.33257	4.33432	183.34	88.5544	88.8135	146.412	8.34548	8.70602	144.144	6.83785	7.30093	21.3789	1.54921	38.1573	146.457	6.86324	144.339		326.03	8.56629	2634.03	470031	1.64854	0.0218852	23.3127	0.281315	6.4798	12.8436
MV24-1_L_95	sweeps 23-41	303.425	203.035	8.84298	0.669142	15215.3	4317.9	364.55		0.0079365	5.73583	0.15437	7.26045	0.0227136	3.49539	0.481429	44.0265	3.49539	0.0492919	6.36368	159.781	9.12861	9.66141	161.749	148.82	148.973	145.763	9.85852	10.171	144.783	5.00433	5.64198	10.4887	0.672257	82.4149	145.782	5.05239	143.089	2080.26
MV24-1_L_78	sweeps 23-41	81.2299	17.694	2.09698	0.217827	3480.44	115.834	9.81812		0.00763095	18.5146	0.167669	10.9067	0.0229371	6.63276	0.608135	43.5975	6.63276	0.0530167	8.65812	153.652	28.3403	28.5047	329.498	196.425	196.534	157.394	15.9022	16.1283	146.192	9.58741	9.94306	55.632	7.11732	26.6089	157.611	9.60053	145.937	575.951	161.934	2.61801	297.049	472925	0.162941		2.1417		0.163198	0.476683
MV24-1_M_137	sweeps 23-41	171.888	83.9053	4.73972	0.488139	7445.14	319.284	8.73992		0.00703326	9.97075	0.159542	8.55527	0.0229841	4.23728	0.495284	43.5083	4.23728	0.050344	7.43223	141.66	14.0751	14.3425	210.919	172.251	172.382	150.303	11.9523	12.2204	146.488	6.13712	6.66707	30.5478	2.53794	56.7939	150.377	6.18548	146.874	1277.67	288.97	12.6908	1221.34	482258	2.46378	0.0198563	14.0365	0.0989491	2.38003	4.5397
MV24-1_L_109	sweeps 30-41	116.142	36.0163	4.06997	0.310105	5044.74	225.377	8.23412		0.0269896	13.2741	0.491013	7.35766	0.0231123	4.22154	0.57376	43.2671	4.22154	0.154081	6.0261	538.286	70.5093	71.6328	2391.72	102.556	102.712	405.601	24.6026	25.0643	147.295	6.14763	6.47362	93.8414	63.6846	0.368519	409.582	5.52403	127.794	866.54	161.172	74.1769	391.843	332945	1.30422	3.77217	9.84679	0.414738	2.25839	1.42002
MV24-1_M_161	Sweeps 23-41	49.2405	11.7522	1.28643	0.238669	1112.13	244.728	6.91517		0.00617614	20.5581	0.156844	17.6796	0.0232695	3.16586	0.17472	42.9748	3.16586	0.0488856	17.3938	124.449	25.5058	25.8814	142.368	408.225	408.553	147.937	24.3386	24.4811	148.286	4.64095	5.32738	-4.15707	-0.235887	298.678	149.306	4.92286	150.703	634.751	201.135	3.47109	358.049	429963	0.196232		2.00961	0.00310769	0.20229	0.574396
MV24-1_L_88	sweeps 23-41	265.291	252.651	8.52002	0.952353	12874.1	14431.4	504.802		0.00806522	6.37527	0.156807	6.07471	0.0232975	4.74071	0.780401	42.923	4.74071	0.0488152	3.79839	162.361	10.3095	10.8016	138.957	89.2037	89.4597	147.905	8.36104	8.73802	148.463	6.95776	7.45394	-6.84073	-0.377453	68.7691	147.894	6.99531	146.117	2780.55	271.689	5.93606	921.207	450027	1.52044	0.0486832	18.6696	0.461124	5.95299	8.394
MV24-1_L_102	sweeps 23-41	68.1985	32.8397	1.92498	0.481531	3203.87	104.82	5.29671		0.00738259	14.4154	0.144902	12.6724	0.0236202	4.59283	0.362429	42.3366	4.59283	0.0444927	11.8108	148.67	21.3527	21.5541	-83.3894	289.279	289.365	137.401	16.2852	16.4561	150.495	6.83194	7.34776	280.473	-9.53034	626.117	137.142	6.9779	150.639	1081.93	190.696	10.3225	835.323	446274	0.38082	0.228186	6.25436	0.0913312	1.70325	3.09995
MV24-1_M_162	Sweeps 23-41	254.815	130.714	7.59917	0.512974	6212.06	185.48	3.47081		0.00788746	6.50599	0.175074	7.14672	0.0242723	2.70544	0.365965	41.1992	2.70544	0.0523129	6.61484	158.797	10.2908	11.7139	299.097	150.886	151.723	163.813	10.8117	11.193	154.601	4.13287	4.94978	48.311	5.62355	26.1122	165.376	4.18313	155.765	659.966	291.322	9.4437	1450.39	428009	3.47121	0.0176841	13.8636	0.108185	1.81085	3.51297
MV24-1_L_115	sweeps 23-41	181.04	136.814	5.74797	0.755713	9122.52	1038.18	18.6844		0.00823519	5.55968	0.167689	6.51751	0.0243101	4.62746	0.710003	41.1352	4.62746	0.0500285	4.58962	165.769	9.17855	9.74015	196.314	106.654	106.866	157.411	9.50362	9.87331	154.838	7.07971	7.60345	21.1271	1.63465	43.002	157.461	7.1125	153.425	1994.66	196.806	12.1324	1134.36	400368	1.26915	0.0153325	12.2607	0.147666	3.50504	5.68815
MV24-1_L_113	sweeps 23-41	59.9379	27.2904	1.74964	0.455311	2859.74	75.7856	2.39601		0.00810005	8.61782	0.152155	11.6987	0.0243992	6.65876	0.569188	40.9849	6.65876	0.0452282	9.61875	163.06	13.9957	14.3588	-43.309	233.774	233.88	143.813	15.6871	15.8792	155.399	10.2239	10.5963	458.815	-8.05647	1936.96	143.585	10.3631	154.832	1202.42	149.469	14.3551	637.426	448156	0.613662		3.91235	0.00923166	0.294525	1.51155
MV24-1_L_85	sweeps 23-41	251.184	140.057	7.44686	0.557587	12295.8	3489.54	196.734		0.00706195	7.22622	0.164266	4.76759	0.024518	4.22836	0.886898	40.7864	4.22836	0.0485915	2.20246	142.236	10.2422	10.6251	128.138	51.8282	52.2691	154.43	6.83004	7.32367	156.147	6.52312	7.10323	-21.8584	-1.11149	49.5505	154.397	6.55908	157.428	1424.89	245.315	9.39411	2017.16	468869	1.1655		8.09739	0.0940483	2.56668	6.69029
MV24-1_M_130	sweeps 23-41	227.672	107.961	7.42548	0.474195	11384.1	589.441	16.4187		0.00846455	6.46416	0.196399	6.54862	0.0271765	4.9945	0.762681	36.7965	4.9945	0.0524137	4.23548	170.367	10.9665	11.4601	303.519	96.5344	96.7605	182.075	10.9155	11.3325	172.853	8.51842	9.05724	43.0505	5.065	18.329	182.25	8.53176	173.044	1194.37	122.967	3.85144	347.543	491537	1.28852		14.8994		0.382445	1.08375
MV24-1_L_108	sweeps 23-41	150.258	37.488	5.50709	0.249491	10000.5	11208.6	487.671		0.0122735	7.89695	0.221082	7.54194	0.0319853	6.45287	0.855598	31.2644	6.45287	0.0501305	3.90402	246.564	19.3527	19.951	201.056	90.6435	90.8912	202.81	13.8651	14.2708	202.962	12.8928	13.3931	-0.947686	-0.0747107	45.9604	202.807	12.9733	201.26	636.831	142.632	3.19128	544.938	402232	0.151845		2.9975	0.0112789	0.490901	1.4945
MV24-1_L_83	sweeps 23-41	255.482	134.386	10.2357	0.526011	16767.4	1193.4	40.6303		0.0107505	6.14325	0.222051	6.84469	0.0327992	5.98918	0.875011	30.4886	5.98918	0.0491008	3.31354	216.13	13.2067	13.8858	152.654	77.6201	77.9124	203.615	12.6284	13.0792	208.043	12.2612	12.8164	-36.2844	-2.17483	69.7605	203.532	12.3607	207.349	1393.86	161.4	3.14971	506.767	478559	0.554051	0.0133536	11.271	0.0462329	0.671664	1.32433
MV24-1_L_99	sweeps 23-41	10.4285	1.14496	0.377943	0.109792	711.904	291.635	11.7573		0.0115747	45.6502	0.285147	17.6654	0.0329026	9.71819	0.550127	30.3927	9.71819	0.0628545	14.752	232.607	105.577	105.677	703.312	313.973	314.033	254.732	39.7986	40.0143	208.689	19.9561	20.3026	70.3276	18.0749	13.5468	255.553	19.808	208.288	256.389	208.987	4.3623	673.767	434079	0.357948		2.53158	0.00455326	0.247717	1.06733
MV24-1_M_171	Sweeps 23-41	24.7839	3943.76	142.026	159.126	1703.18	85.2871	2.08111		0.0355849	2.0962	0.505763	14.4406	0.0637729	11.0125	0.761073	15.6806	11.0125	0.0575188	9.3411	706.746	14.5588	28.388	511.452	205.3	205.873	415.596	49.2499	49.6823	398.53	42.5589	43.1151	22.0787	4.10648	32.3662	419.232	42.9128	720.572	10866.1	174.203	29.5033	2937.08	381287	621.199	28.5626	832.711	84.2338	724.363	426.305
MV24-1_M_148	Sweeps 23-41	155.159	52.9733	33.3144	0.341413	29492	1031.97	18.2367		0.0550242	4.896	1.95926	3.77836	0.180681	3.57888	0.929253	5.53463	3.57888	0.0786465	1.21145	1082.64	51.6113	64.1954	1163.23	24.0104	27.6986	1101.63	25.4005	28.4441	1070.69	35.3056	39.3972	7.95526	2.80833	3.58075	1105.45	36.7426	1075.61	753.059	215.181	10.366	722.787	462413	2.6661		8.868	0.03317	0.981667	2.26727
MV24-1_M_126	sweeps 23-41	592.301	109.556	142.006	0.184966	240904	6822.54	207.623		0.0655499	4.40131	2.50886	5.75615	0.209433	4.84071	0.840963	4.77481	4.84071	0.0868822	3.11461	1283.29	54.7258	59.9277	1357.91	60.0389	60.2982	1274.6	41.79	43.8496	1225.79	54.0368	57.676	9.72903	3.82921	5.63614	1274.97	56.8385	1224.39	220.133	768.278	8.70004	2400.75	483380	1.47382	0.00689491	2.75454	0.0416305	1.04857	3.40008
MV24-1_M_133	sweeps 23-41	983.044	535.924	267.922	0.545168	436014	28428.2	1620.86		0.0655477	5.88246	2.65679	4.3944	0.21754	3.91635	0.891213	4.59685	3.91635	0.0885762	1.99323	1283.25	73.1402	77.0887	1395.03	38.226	38.629	1316.53	32.418	35.1054	1268.86	45.1082	49.658	9.04375	3.62071	4.08256	1316.88	47.5906	1267.79	1048.88
MV24-1_M_147	Sweeps 23-41	101.975	38.8812	34.9516	0.381283	28350.8	2890.73	39.9157		0.078988	4.89332	4.10496	5.14027	0.281149	4.61335	0.887259	3.55683	4.61335	0.105894	2.267	1536.6	72.4037	90.1216	1729.88	41.6049	43.5253	1655.29	41.9693	44.7569	1597.15	65.2638	69.9141	7.67275	3.5125	4.37772	1660.07	71.1173	1608.21	332.452	108.022	9.3906	353.513	441323	1.27245		27.1902	0.0572228	0.946558	1.92237
MV24-1_M_169	Sweeps 23-41	365.224	59.8161	118.63	0.163779	102154	6126.42	106.749		0.0902448	4.04829	4.06892	4.09735	0.282564	3.89784	0.936055	3.53902	3.89784	0.104438	1.26298	1746.37	67.7302	89.6954	1704.45	23.2528	26.5676	1648.1	33.3961	36.7789	1604.26	55.358	60.7206	5.87779	2.65951	3.49247	1643.02	60.3939	1591.9	260.69	601.946	8.59887	1616.33	395650	1.62664	0.00417654	5.85117	0.0351467	1.10239	4.36511
MV24-1_L_100	sweeps 23-35	619.384	355.468	225.109	0.573905	412073	19487.1	643.068		0.0867357	4.3181	4.14586	5.71966	0.283593	5.25053	0.917979	3.52618	5.25053	0.106027	2.26858	1681.21	69.6593	80.3399	1732.2	41.6213	42.2783	1663.39	46.7904	49.2121	1609.43	74.7808	79.1431	7.08747	3.24387	4.86017	1663.69	81.6027	1604.08	1042.28	233.29	4.62521	1074.13	413546	3.86542	0.0117372	41.688	0.256124	4.37429	8.27898
MV24-1_M_150	Sweeps 23-41	200.42	62.9622	69.2426	0.314152	55558.5	1538.01	29.3673		0.0864304	3.23834	4.2952	4.2398	0.286857	3.69085	0.855007	3.48606	3.69085	0.108597	2.0865	1675.54	52.0715	77.9932	1776.01	38.0725	40.1401	1692.44	34.9201	38.2585	1625.8	53.0371	58.7903	8.45764	3.93735	3.57338	1693.64	57.9777	1625.38	615.169	130.417	5.55498	506.676	457303	8.33738		12.679	0.0671802	0.565217	2.10941
MV24-1_M_154	Sweeps 23-41	27.4492	25.6225	11.662	0.933452	8873.55	268.284	5.21478		0.0922771	5.98724	4.67698	5.46075	0.301873	3.37774	0.605373	3.31266	3.37774	0.112367	4.29076	1784.02	102.235	119.218	1838.05	77.7004	78.7194	1763.13	45.6804	48.3976	1700.59	50.4893	57.0681	7.47892	3.54722	4.77939	1770.69	56.3911	1704.84	1600.12	167.054	24.7543	418.395	445968	1.14098		21.9382	0.107001	1.85001	3.5439
MV24-1_M_138	sweeps 23-41	76.2913	76.7337	54.9636	1.0058	74232.7	1838.98	52.3443		0.13331	3.35332	12.6084	5.24624	0.494917	4.90297	0.934569	2.02054	4.90297	0.184769	1.86652	2529.39	79.726	92.2459	2696.14	30.8293	31.201	2650.85	49.355	52.2446	2591.91	104.639	111.453	3.86574	2.22337	4.03373	2650.99	141.698	2598.95	1655.5	217.033	18.2225	548.739	464845	1.47853	0.0100991	26.6029	0.159542	2.63492	4.64627
DISCORDANT >10%
MV24-1_M_145	Sweeps 23-41	360.495	102.911	110.991	0.28547	89238.4	2390.21	33.9401		0.0745542	3.30571	3.86088	2.90509	0.259881	2.56888	0.851764	3.84792	2.56888	0.107749	1.35661	1453.37	46.3576	68.9291	1761.7	24.798	27.8757	1605.54	23.4294	27.9405	1489.23	34.1591	41.3645	15.4663	7.24447	2.27498	1602.63	36.512	1484.4	511.455	638.294	5.94501	1890.38	465474	0.93245	0.0370489	3.39115	0.0679955	1.03877	3.2657
MV24-1_L_104	sweeps 30-41	191.85	139.601	113.03	0.72766	164511	6522.47	152.47		0.126418	3.97992	9.8962	4.43387	0.425399	4.28463	0.966339	2.35074	4.28463	0.168722	1.14071	2406.1	90.2807	105.241	2545.01	19.116	19.9083	2425.16	40.889	42.968	2284.94	82.4311	86.6769	10.2187	5.78163	3.30839	2425.56	101.612	2274.68	736.555	222.343	8.27588	645.737	414265	1.39566	0.0157712	40.347	0.0870592	1.72874	3.69767
CSUF-4 Claremont Fm Sandstone
CSUF-4_M_314	Sweeps 23-41	204.728	89.0275	0.470003	0.434857	344.931	23.5183	0.859742		0.000701253	20.765	0.0164009	31.5165	0.00187184	6.3705	0.202132	534.233	6.3705	0.0635473	30.8659	14.1689	2.94114	2.98421	726.576	654.448	654.579	16.5181	5.16382	5.17559	12.0554	0.767272	0.805596	98.3408	27.0171	1.49822	16.6158	0.807846	11.9031	1191.38	132.555	5.18299	316.782	459886	0.413598		10.3441	0.00981129	0.404714	0.887243
CSUF-4_M_340	Sweeps 23-41	309.425	167.299	0.743497	0.540675	513.81	40.9661	1.67078		0.000656618	27.5243	0.014342	24.5164	0.0019438	6.25181	0.255006	514.457	6.25181	0.0535127	23.7058	13.2673	3.65054	3.6802	350.568	535.806	535.987	14.4592	3.51974	3.53305	12.5184	0.781864	0.822547	96.4291	13.4226	5.46228	14.5017	0.800425	12.4501	1551.3	225.42	3.98851	782.547	458699	0.667503		13.7644	0.107939	1.52593	3.32068
CSUF-4_M_377	Sweeps 23-41	699.927	688.39	1.86618	0.983517	1238.94	79.0899	1.90766		0.000552101	15.4311	0.0126348	14.0713	0.00203161	6.55218	0.465641	492.22	6.55218	0.0451053	12.4527	11.1561	1.72103	1.75122	-49.9474	303.039	303.399	12.7488	1.78271	1.79857	13.0833	0.856375	0.887418	126.194	-2.62374	158.934	12.7415	0.862996	13.4286	2757.78	279.315	9.93215	2264.64	441577	2.43238	0.0271126	24.9895	0.527536	5.24574	11.2684
CSUF-4_M_339	Sweeps 23-41	191.641	95.9086	0.473719	0.500459	315.043	33.5035	2.5389		0.000599041	31.0993	0.0188158	25.7979	0.00203565	11.878	0.460424	491.245	11.878	0.0670377	22.9008	12.1043	3.76322	3.78722	838.957	476.867	477.039	18.9277	4.83773	4.85425	13.1093	1.55553	1.57837	98.4374	30.7403	0.907318	19.0548	1.53552	13.1935	1018.97	236.026	5.01886	801.646	436973	1.04482		13.1283	0.018724	0.920896	2.14812
CSUF-4_L_295	Sweeps 23-41	115.967	106.321	0.309763	0.916824	206.468	8.34629	0.513184		0.000555274	33.2778	0.0135055	47.7734	0.0020641	8.94498	0.187238	484.473	8.94498	0.0474548	46.9285	11.2202	3.73279	3.75458	72.1869	1115.87	1115.97	13.6215	6.464	6.4704	13.2923	1.18777	1.21814	81.5862	2.41667	284.647	13.6287	1.2441	13.6342	2721.72	173.549	8.09097	1017.05	444586	0.890561		22.5827	0.230318	4.78513	7.43077
CSUF-4_S_453	Sweeps 23-41	1352.68	606.797	3.35342	0.44859	2644.94	78.1581	1.75312		0.000660359	8.53459	0.0139151	9.10133	0.00208194	3.98047	0.437351	480.32	3.98047	0.0484747	8.18474	13.3429	1.13838	1.20319	122.519	192.8	193.326	14.0317	1.26829	1.29563	13.4071	0.533112	0.58514	89.0571	4.45145	17.2255	14.0454	0.536028	13.4119	1074.04	289.592	3.1131	1649.52	439708	3.6211		37.8556	0.00341339	0.988614	2.65859
CSUF-4_M_383	Sweeps 23-41	128.764	106.032	0.36502	0.82346	245.116	13.3087	0.680007		0.000741866	24.4307	0.00500268	50.2457	0.00218762	12.7198	0.253151	457.118	12.7198	0.0165855	48.609	14.9892	3.6606	3.68642	-3557.96	2699.78	2699.99	5.06697	2.5396	2.54137	14.0869	1.78986	1.80726	100.396	-178.014	0.304611	4.86743	1.8654	13.9554	2295.59	200.247	23.5924	447.278	444940	0.975039	0.0403555	16.9489	0.063344	1.52416	1.91939
CSUF-4_M_316	Sweeps 23-41	448.448	464.459	1.35578	1.0357	854.028	58.2294	7.19227		0.000702951	22.4964	0.0145006	16.8385	0.00219004	9.70597	0.576417	456.612	9.70597	0.048021	13.7596	14.2032	3.19408	3.23391	100.3	325.467	325.793	14.6179	2.4438	2.46327	14.1025	1.36729	1.39713	85.9397	3.5259	45.6454	14.6292	1.36981	14.0833	2970.23	288.104	10.2091	1116.52	455549	1.37136	0.0556276	37.8838	0.250586	5.10379	7.70458
CSUF-4_L_267	Sweeps 23-41	149.785	41.3488	0.413357	0.276054	299.328	72.2989	3.17029		0.0014575	22.6114	0.0168364	28.7315	0.00223521	7.88848	0.274558	447.385	7.88848	0.0546299	27.6274	29.4377	6.65144	6.73787	397.123	619.328	619.482	16.9531	4.83045	4.84361	14.393	1.13412	1.17111	96.3757	15.101	5.65948	17.0091	1.15544	13.7226	725.63	261.071	2.71299	523.182	447723	0.536029	0.0690154	10.3424	0.0451533	1.03476	1.88659
CSUF-4_L_262	Sweeps 23-41	83.1511	39.2234	0.23732	0.471713	173.799	25.6658	1.37778		0.00103293	49.1937	0.0066987	65.5555	0.00231826	10.8331	0.165252	431.359	10.8331	0.0209569	64.6542	20.8669	10.2599	10.2884	-2435.6	2699.75	2699.87	6.77906	4.42925	4.43156	14.9271	1.61521	1.64332	100.613	-120.195	0.682569	6.59909	1.68885	14.4603	1350.35	162.862	7.31865	235.209	434265	0.32621		5.30627	0.0228991	0.162786	0.554185
CSUF-4_L_273	Sweeps 23-41	99.4644	30.2335	0.280247	0.303963	204.363	10.2542	0.542059		0.00124377	33.7683	0.0142024	40.5881	0.0023365	9.11601	0.224598	427.991	9.11601	0.0440856	39.5512	25.1237	8.47859	8.52793	-105.863	972.902	973.02	14.3195	5.77122	5.77911	15.0445	1.36986	1.40347	114.211	-5.06284	130.611	14.3036	1.41388	14.5478	732.498	220.208	6.53113	703.258	419177	0.768159	0.00707202	8.68361	0.0411277	1.14802	2.13668
CSUF-4_M_378	Sweeps 23-41	162.175	36.1866	0.460046	0.223134	368.691	12.4143	0.621846		0.00140139	37.1133	0.0158633	25.5747	0.00240898	5.98359	0.233965	415.113	5.98359	0.0477592	24.8649	28.3053	10.4977	10.5298	87.3847	589.559	589.734	15.9809	4.05506	4.06601	15.5106	0.926977	0.967119	82.2502	2.94249	119.757	15.9912	0.954495	15.0538	573.964	145.156	2.5068	429.291	441714	0.738505		10.4197		0.976817	2.15224
CSUF-4_S_444	Sweeps 23-31	132.085	76.9793	0.40925	0.582802	311.195	11.4964	0.500224		0.000830936	39.5033	0.0162374	65.9661	0.00249635	15.6707	0.237558	400.584	15.6707	0.0471748	64.0777	16.788	6.62907	6.66176	58.0514	1527.72	1527.93	16.3548	10.7022	10.7092	16.0725	2.51554	2.53903	72.3133	1.72611	728.636	16.361	2.58787	16.0017	1671.17	210.835	9.95643	807.622	438926	0.302116		6.83941	0.188484	1.97265	4.54241
CSUF-4_M_334	Sweeps 23-41	1887.19	1625.37	8.70321	0.861267	5425.15	183.785	8.99156		0.00113954	8.12403	0.0249576	7.19328	0.00344929	4.50529	0.626319	289.915	4.50529	0.0524774	5.60764	23.0194	1.86904	2.03798	306.27	127.747	128.516	25.0305	1.7785	1.85502	22.1973	0.998332	1.09605	92.7524	11.319	3.04054	25.092	0.994439	22.0713	2527.95
CSUF-4_L_290	Sweeps 23-41	258.064	147.352	1.08862	0.570992	765.555	48.8247	1.94939		0.000990692	23.5521	0.0253732	20.5143	0.00346873	7.42792	0.362085	288.29	7.42792	0.0530521	19.1223	20.0141	4.71142	4.76661	330.997	433.711	433.936	25.4421	5.15442	5.18201	22.3222	1.65521	1.71617	93.2561	12.2627	8.85085	25.5098	1.66655	22.5452	1066.94	282.672	8.5578	787.194	439764	2.01823	0.00756027	20.662	0.0415245	1.18808	2.41729
CSUF-4_L_281	Sweeps 23-41	213.606	141.842	0.929285	0.664036	635.772	25.236	1.39987		0.000992741	15.6113	0.0273527	24.6059	0.00349287	6.7647	0.274922	286.297	6.7647	0.0567957	23.6578	20.0555	3.12938	3.21281	483.576	522.449	522.626	27.4004	6.65197	6.67671	22.4773	1.51787	1.58496	95.3519	17.9673	5.03159	27.5071	1.54597	22.7537	2007.52	290.688	7.15548	1057.98	438147	1.12924	0.0143237	19.3131	0.170321	2.93563	4.0828
CSUF-4_S_449	Sweeps 23-41	590.823	487.267	2.81567	0.824726	1949.87	191.297	5.12297		0.0012503	15.4042	0.0267655	15.5282	0.00354039	3.63934	0.23437	282.454	3.63934	0.0548304	15.0957	25.2554	3.88797	3.95723	405.324	337.918	338.19	26.8199	4.11012	4.14069	22.7825	0.827671	0.923209	94.3792	15.0534	4.69052	26.9074	0.853049	22.422	2022.03
CSUF-4_M_307	Sweeps 23-41	850.154	1117.17	4.49221	1.31408	2596.96	1721.59	45.1093		0.00115127	7.33305	0.0218028	9.59061	0.003613	5.71337	0.595726	276.778	5.71337	0.0437665	7.70306	23.2562	1.70441	1.89707	-123.763	190.144	190.751	21.9003	2.07788	2.12843	23.249	1.32591	1.40766	118.785	-6.15814	28.8803	21.8709	1.33512	23.2471	4517.23	404.494	12.0215	2353.6	443226	6.20494	0.495696	54.1605	0.472885	5.91137	12.6187
CSUF-4_S_440	Sweeps 23-41	941.851	536.918	4.2899	0.570067	3172.38	173.386	4.21216		0.00122774	9.39938	0.0232774	9.57851	0.00368603	3.3446	0.349178	271.294	3.3446	0.0458009	8.97561	24.8001	2.32963	2.43948	-12.8468	216.88	217.374	23.3646	2.21243	2.2551	23.718	0.791816	0.898142	284.622	-1.5126	3116.79	23.3569	0.802531	23.6137	1584.75	371.461	7.11814	1364.93	429012	3.73912	0.0196474	37.0009	0.118614	2.35155	4.53884
CSUF-4_M_399	Sweeps 23-41	97.7825	38.0876	0.464968	0.389514	357.037	123.722	8.17063		0.00105757	29.6379	0.0319277	16.152	0.00411163	8.30353	0.514089	243.213	8.30353	0.0563187	13.8541	21.3645	6.32864	6.35913	464.945	306.929	307.224	31.9121	5.07426	5.10844	26.4509	2.19186	2.24149	94.311	17.1131	3.78504	32.03	2.18059	26.7759	1106.25	121.795	5.6947	412.953	446336	0.434846		5.89973	0.0386862	0.827663	1.87009
CSUF-4_L_291	Sweeps 23-41	543.265	347.936	2.87152	0.640453	1885.69	200.533	6.12059		0.00142329	14.2887	0.0264742	11.6129	0.00418211	6.98801	0.601744	239.114	6.98801	0.045912	9.27512	28.7473	4.10468	4.23396	-6.99995	223.869	224.361	26.5318	3.04122	3.09174	26.9034	1.87609	1.95399	484.337	-1.40055	12291.7	26.5238	1.88453	26.7013	1737.58	232.209	3.17546	784.583	430387	3.44401	0.685599	43.0748	0.254079	1.82357	3.38499
CSUF-4_M_387	Sweeps 23-41	408.852	219.383	2.50994	0.536583	1964.2	41.5752	1.30445		0.00134651	14.1443	0.0286824	15.1509	0.00520846	5.37832	0.354983	191.995	5.37832	0.0399398	14.1642	27.1975	3.8443	3.92472	-354.837	366.044	366.38	28.7138	4.28948	4.32231	33.4887	1.79646	1.89203	109.438	-16.6294	9.74901	28.6103	1.83	34.0555	1254.18	230.746	4.81894	855.148	432671	2.39896	0.0516825	28.1307	0.0561622	1.17985	2.46672
CSUF-4_S_441	Sweeps 23-41	425.839	246.65	3.26657	0.579208	2033.63	195.505	14.3755		0.00206784	12.7528	0.0432408	10.9984	0.00615957	4.10362	0.373111	162.349	4.10362	0.0509145	10.2041	41.7524	5.3191	5.4568	236.985	235.374	235.788	42.9832	4.62878	4.69668	39.5854	1.61945	1.76698	83.2962	7.905	16.6043	43.0559	1.63281	39.3732	1535.74	138.028	16.086	685.28	445100	0.955449	0.0235872	14.0074	0.178074	1.94271	2.937
CSUF-4_M_315	Sweeps 23-41	204.816	126.486	1.53014	0.617558	1170.44	54.7338	1.36605		0.00168337	23.3971	0.0329732	19.0914	0.00619208	6.14108	0.321668	161.497	6.14108	0.0386209	18.0767	33.9959	7.94738	8.03911	-442.377	475.565	475.841	32.9403	6.18783	6.22621	39.7936	2.43623	2.56696	108.995	-20.8055	9.68596	32.7922	2.49062	40.4025	1678.11	185.973	3.83041	892.468	450508	1.34616		14.9719	0.107627	2.84464	5.08502
CSUF-4_M_367	Sweeps 23-29	481.78	205.947	3.72993	0.42747	1612.98	494.92	16.3957		0.00228936	33.2757	0.0629025	16.9659	0.00630713	4.37079	0.257622	158.551	4.37079	0.0723327	16.3932	46.22	15.3625	15.488	995.328	333.154	333.888	61.9418	10.1949	10.3165	40.5307	1.76595	2.01316	95.9279	34.5665	1.3745	62.392	1.81173	40.13	1117.86
CSUF-4_M_406	Sweeps 23-41	468.084	249.958	3.68095	0.534002	2839.88	283.375	8.41821		0.00215325	11.838	0.042078	10.7181	0.00640885	5.48303	0.511569	156.034	5.48303	0.0476183	9.20941	43.475	5.14103	5.29456	80.377	218.646	219.12	41.8509	4.39442	4.46137	41.1822	2.25084	2.36615	48.7636	1.5976	139.404	41.8652	2.26226	40.9769	1403.03	105.923	4.09855	522.822	445879	1.91656		15.9916	0.0773193	0.561958	1.01514
CSUF-4_M_338	Sweeps 23-41	347.874	266.465	3.4555	0.765981	1474.09	156.763	2.78881		0.00266202	9.49358	0.0570365	10.6923	0.00748046	5.70394	0.53346	133.682	5.70394	0.0552998	9.04385	53.7337	5.09447	5.43317	424.336	201.779	202.248	56.3226	5.85822	5.97372	48.0427	2.73014	2.89991	88.6781	14.7008	5.42206	56.4977	2.71923	47.2829	1030.84	194.498	14.3332	1134.16	445984	1.91545	0.0213248	39.8972	0.139518	2.1914	5.43406
CSUF-4_L_260	Sweeps 23-41	215.674	73.0092	1.95812	0.338516	1466	84.7492	2.23815		0.00321312	17.4702	0.0517638	17.258	0.00761596	6.82856	0.395675	131.303	6.82856	0.0492947	15.8496	64.8399	11.3095	11.5569	161.853	370.654	370.933	51.2449	8.62438	8.68926	48.9096	3.32718	3.47106	69.7815	4.55712	69.2326	51.2946	3.35546	48.0348	1007.95	195.836	10.1229	754.635	422246	0.826871		4.98974	0.0721474	1.47387	3.26003
CSUF-4_M_362	Sweeps 23-41	460.749	284.418	4.71396	0.617294	3430.29	162.964	7.11212		0.00252323	8.69486	0.0557648	7.63358	0.00826906	5.13838	0.673128	120.933	5.13838	0.0489105	5.64523	50.9357	4.42321	4.66188	143.516	132.465	133.229	55.1002	4.09403	4.21726	53.0866	2.71659	2.87614	63.0101	3.65437	34.1941	55.1428	2.71957	53.3119	1616.81	67.9845	2.94865	377.242	439400	0.782131		22.6487	0.0361824	0.535342	1.96386
CSUF-4_M_308	Sweeps 23-35	1063.87	169.655	10.6926	0.159469	9304.13	989.437	56.9398		0.00183349	19.2029	0.0622664	8.3049	0.00930672	7.11418	0.856624	107.449	7.11418	0.0485239	4.28485	37.0249	7.10333	7.24524	124.848	100.893	101.986	61.3339	4.94293	5.12004	59.7175	4.22879	4.41803	52.1679	2.6355	38.8024	61.368	4.23021	60.2865	552.203	601.575	8.11155	1775.28	449062	1.62619	0.0416763	5.62136	0.124412	2.46962	4.5288
CSUF-4_L_282	Sweeps 23-41	238.379	66.0251	2.61961	0.276975	1950.63	133	2.6947		0.00236691	28.0241	0.062512	12.1187	0.0098803	4.64807	0.383546	101.211	4.64807	0.0458873	11.1919	47.7838	13.3751	13.4867	-8.31833	270.202	270.61	61.5687	7.23961	7.35002	63.3799	2.93151	3.19976	861.931	-2.94175	24749.6	61.5306	2.97031	64.0717	796.097	152.669	4.05725	884.095	425883	2.10986		22.2899		0.849822	2.97519
CSUF-4_M_343	Sweeps 23-41	271.036	142.752	3.70348	0.526689	2487.24	600.761	13.8642		0.0039315	11.549	0.0790946	11.9269	0.0110199	6.61302	0.554463	90.7453	6.61302	0.0520559	9.92567	79.3083	9.14133	9.55464	287.874	226.86	227.298	77.2934	8.87656	9.01757	70.65	4.64659	4.86332	75.458	8.59504	19.4077	77.4314	4.6471	69.8896	1248.76	200.936	6.23536	766.118	454386	1.45407		19.4997	0.115524	1.31221	3.47969
CSUF-4_S_452	Sweeps 23-41	172.087	43.671	2.20564	0.253773	1631.73	209.997	19.5842		0.00512873	16.27	0.0679734	16.995	0.0110225	4.5101	0.265378	90.7236	4.5101	0.0447258	16.3856	103.398	16.7799	17.0481	-70.6149	400.344	400.617	66.7745	10.9832	11.0516	70.6668	3.16973	3.41293	200.073	-5.82902	567.374	66.6928	3.25348	69.3412	578.622	145.436	3.24491	467.641	438706	0.376969		3.8005	0.0363319	0.459483	1.84435
CSUF-4_S_445	Sweeps 23-41	529.514	208.517	7.22341	0.39379	5664.38	1102.3	36.2607		0.00338231	10.434	0.0809164	5.62844	0.0117228	2.69505	0.478827	85.3038	2.69505	0.0500615	4.94126	68.2484	7.10903	7.38228	197.846	114.794	115.652	79.0061	4.27821	4.51425	75.1305	2.01305	2.41907	62.0258	4.90547	22.0567	79.0866	2.0231	75.5721	1179.89	161.801	4.43505	1165.87	428705	1.97477		22.3245	0.182707	2.64189	5.20638
CSUF-4_M_354	Sweeps 23-41	112.374	34.0924	1.52313	0.303383	1203.38	32.7735	1.17243		0.00348753	16.1942	0.0796223	14.2708	0.0119186	6.92261	0.485088	83.9028	6.92261	0.0484518	12.4793	70.3679	11.3757	11.5555	121.38	294.029	294.376	77.7898	10.6867	10.78	76.3777	5.25613	5.42908	37.0754	1.81527	152.489	77.8191	5.29132	76.6704	820.24	166.258	3.51748	230.476	432436	0.392061		4.97121		0.256225	0.654543
CSUF-4_M_335	Sweeps 23-41	96.6457	31.487	1.44533	0.325798	1085.96	54.4889	1.85213		0.0056791	19.6046	0.0822548	16.776	0.0125081	4.83718	0.28834	79.948	4.83718	0.0476944	16.0635	114.462	22.3764	22.7363	84.1863	381.097	381.378	80.2626	12.9464	13.0506	80.1325	3.85216	4.18123	4.81533	0.162185	430.909	80.2653	3.93588	78.3293	576.269	191.409	6.51824	392.111	460799	0.612188		10.1608	0.00974071	0.451003	1.39025
CSUF-4_M_400	Sweeps 23-41	447.179	95.5654	6.27591	0.213707	5045.56	322.086	4.72934		0.0037287	12.8185	0.0825274	7.33188	0.012639	5.1557	0.703189	79.1199	5.1557	0.0473568	5.21298	75.2248	9.6248	9.87023	67.2432	124.072	124.909	80.5184	5.6755	5.85867	80.9659	4.14825	4.38772	-20.4076	-0.555859	222.252	80.5091	4.16594	81.16	590.016	111.251	6.71822	379.916	439025	1.59671	0.0379287	15.6349	0.0628424	0.88228	1.18955
CSUF-4_M_382	Sweeps 23-31	1114.2	193.926	15.9102	0.174049	12523.9	582.15	14.2045		0.00488053	12.6079	0.0886431	8.8501	0.0127871	7.21372	0.8151	78.2038	7.21372	0.0502772	5.12705	98.4061	12.3768	12.9578	207.832	118.893	121.313	86.2386	7.31708	7.57397	81.9084	5.87126	6.12069	60.5892	5.02113	22.7217	86.3279	5.86722	81.4569	454.737	155.28	12.0142	431.98	462076	1.25596	0.175341	16.4759	0.245837	1.94873	1.78348
CSUF-4_M_322	Sweeps 23-41	1344.3	825.271	22.6439	0.613905	17603	624.301	17.218		0.00448351	4.20388	0.0952653	5.6567	0.013401	3.68465	0.651377	74.6212	3.68465	0.0515579	4.29205	90.4187	3.79261	4.96705	265.853	98.4883	99.4984	92.3964	4.99584	5.33845	85.8148	3.14102	3.59007	67.7209	7.12322	12.0164	92.5314	3.13956	85.3378	1772.98
CSUF-4_M_366	Sweeps 23-41	1168.98	909.225	20.4325	0.777792	14651.8	490.579	17.2687		0.00423331	4.43944	0.0909599	6.20691	0.0135265	2.12135	0.341773	73.929	2.12135	0.0487712	5.83314	85.3838	3.78257	4.51641	136.844	137.042	137.782	88.3972	5.25468	5.49179	86.6129	1.82508	2.38531	36.707	2.01848	63.3986	88.434	1.8524	86.7788	2794.32
CSUF-4_M_311	Sweeps 23-41	434.712	300.273	7.59376	0.690739	5436.23	241.41	23.4522		0.00469126	11.8409	0.0897264	9.51589	0.0135773	3.88534	0.4083	73.6524	3.88534	0.0479299	8.68656	94.5988	11.1752	11.6723	95.7821	205.645	206.161	87.2485	7.95577	8.1525	86.936	3.35508	3.78868	9.23571	0.358214	194.903	87.2549	3.39219	86.0309	1990.5
CSUF-4_M_360	Sweeps 23-41	321.999	131.104	5.16294	0.407157	4085.24	235.394	5.81592		0.00422157	10.5325	0.0919285	8.08701	0.0136484	4.43036	0.547837	73.2684	4.43036	0.0488501	6.76547	85.1475	8.94928	9.28088	140.61	158.838	159.476	89.2983	6.91312	7.09899	87.3885	3.8455	4.14675	37.8506	2.13863	70.259	89.3376	3.86499	87.5372	1006.12	89.8999	4.90993	359.961	435275	1.15382		10.0251	0.0198401	0.655634	1.01702
CSUF-4_M_309	Sweeps 23-41	253.389	215.84	4.47351	0.851813	2978.23	121.31	2.62177		0.00394612	9.66996	0.0874123	10.8047	0.0136594	5.29948	0.490478	73.2097	5.29948	0.046413	9.41581	79.6025	7.6824	8.19026	19.1451	226.138	226.622	85.0899	8.81904	8.98862	87.4581	4.60353	4.93217	-356.818	-2.78316	5395.9	85.041	4.64759	88.6338	2561.7	265.271	16.1848	1589.25	468914	0.677437	0.0147831	11.7326	0.446585	6.57931	9.86491
CSUF-4_M_355	Sweeps 23-41	884.636	378.745	14.3772	0.428137	10924.7	4357.3	177.059		0.00442962	4.32953	0.0898788	6.85056	0.0137038	4.7256	0.689812	72.9726	4.7256	0.0475681	4.95973	89.3345	3.85923	4.64066	77.8034	117.812	118.69	87.3904	5.73635	5.95066	87.7404	4.11817	4.40369	-12.7719	-0.400438	170.844	87.3832	4.13668	87.6287	1176.73	178.088	3.62917	711.411	465846	1.36894	0.0131875	19.0684	0.0526894	1.21228	2.55107
CSUF-4_L_303	Sweeps 23-35	645.494	266.004	10.5784	0.412093	7726.41	240.576	6.03331		0.0044099	9.7919	0.0931521	7.16641	0.0138952	4.93863	0.689136	71.9672	4.93863	0.0486212	5.19301	88.9375	8.68954	9.34357	129.573	122.169	123.07	90.4354	6.20074	6.49663	88.9577	4.36312	4.75839	31.3457	1.63399	64.8188	90.4658	4.37679	88.959	923.361	128.241	3.14088	586.394	467087	1.84972		23.2162	0.0515079	0.445292	1.83391
CSUF-4_M_356	Sweeps 23-41	633.868	199.19	10.137	0.314246	8213.52	618.974	19.9645		0.0043095	8.04625	0.0977737	5.80132	0.013929	3.17867	0.547922	71.7929	3.17867	0.0509099	4.85297	86.917	6.97854	7.41555	236.791	111.944	112.816	94.7192	5.24645	5.51774	89.1722	2.81497	3.23039	62.3413	5.85623	17.843	94.8328	2.82222	89.286	850.319	168.609	13.2451	469.798	458799	1.00111	0.921457	17.6119	0.202622	1.79375	1.98307
CSUF-4_S_448	Sweeps 23-41	278.388	102.248	4.46683	0.367286	3518.69	122.182	3.26005		0.00396197	9.44687	0.0883978	10.2295	0.013949	5.42337	0.530171	71.6895	5.42337	0.0459617	8.67349	79.9218	7.5352	7.88709	-4.35388	209.239	209.748	86.0097	8.43602	8.57984	89.2999	4.80968	5.06704	2151.04	-3.82535	98568.8	85.9418	4.85405	89.8575	1063.34	148.641	3.4537	523.387	454806	1.15637		16.6613	0.0144321	0.653018	1.88615
CSUF-4_S_446	Sweeps 23-41	306.808	116.553	5.05691	0.379887	3892.8	1552.8	30.5629		0.00452177	8.77701	0.100291	8.38247	0.0140372	4.92856	0.58796	71.2394	4.92856	0.0518183	6.7805	91.1886	7.98561	8.41612	277.392	155.267	155.885	97.0454	7.75815	7.9541	89.8603	4.39809	4.68117	67.6053	7.40386	18.2018	97.1922	4.40041	89.7784	1044.8	188.759	3.20918	819.856	436932	0.992324	0.0125852	15.4068	0.0626869	0.910694	2.66548
CSUF-4_M_398	Sweeps 23-41	201.201	166.843	3.75861	0.829237	2604.84	128.967	7.35207		0.004699	11.1309	0.0984987	14.0046	0.0140699	4.72109	0.337111	71.0738	4.72109	0.0507737	13.1848	94.7544	10.5223	10.8766	230.542	304.489	304.812	95.3896	12.7506	12.8647	90.0682	4.22263	4.51181	60.9321	5.57858	51.6315	95.4985	4.28153	89.388	2444.84	264.521	13.4734	1147.9	438106	0.924418		24.8311	0.220159	2.51916	6.85385
CSUF-4_L_302	Sweeps 23-41	590.58	227.262	9.82214	0.384812	7063.62	4682.49	53.9323		0.00473059	8.77962	0.0972666	5.93178	0.0141055	4.76899	0.803972	70.8943	4.76899	0.0500119	3.52743	95.3898	8.35513	9.02699	195.552	81.9823	83.2228	94.2501	5.33908	5.67212	90.2946	4.27612	4.64967	53.8257	4.19674	19.481	94.3311	4.27696	89.9762	949.051	220.765	11.3008	596.928	425840	0.906728		12.8194	0.0243815	0.517234	1.25064
CSUF-4_M_310	Sweeps 23-41	317.404	119.513	5.20459	0.376535	4163.7	345.968	10.6243		0.00429644	10.0724	0.087138	7.62755	0.0141476	3.60069	0.472063	70.6832	3.60069	0.0446707	6.72418	86.6543	8.70953	9.24107	-73.5666	164.379	165.067	84.8338	6.2078	6.44511	90.5624	3.23807	3.72077	223.102	-6.75268	275.098	84.7154	3.27827	90.8009	1063.73	162.899	4.01159	685.074	441857	3.07456		20.5859	0.0175572	0.714998	1.12574
CSUF-4_M_336	Sweeps 23-41	517.31	231.146	8.99404	0.446823	6375.54	229.132	5.75978		0.00525915	6.06067	0.0982521	8.34167	0.0143237	4.86817	0.583597	69.8145	4.86817	0.0497492	6.7738	106.02	6.40871	7.41576	183.278	157.788	158.44	95.1617	7.57745	7.82121	91.6812	4.43161	4.80561	49.9769	3.65736	43.1338	95.2329	4.44658	90.6302	1088.79
CSUF-4_M_390	Sweeps 23-31	704.471	439.126	12.3895	0.623342	9846.42	451.307	18.2417		0.00411061	5.94488	0.0912843	13.5451	0.0143625	8.75255	0.646178	69.6256	8.75255	0.0460961	10.3374	82.914	4.91905	5.88769	2.65475	249.051	250.308	88.699	11.5046	11.679	91.9282	7.98896	8.22147	-3362.78	-3.64058	324855	88.6325	8.04688	92.8767	1603.08	342.806	4.87233	955.121	441424	1.39183	3.023	31.5197	0.848949	6.45036	5.65453
CSUF-4_M_371	Sweeps 23-41	236.635	194.675	4.51849	0.822683	2990.49	528.497	14.6327		0.00484106	11.2331	0.0927771	10.5375	0.0144392	5.03996	0.478288	69.2557	5.03996	0.046601	9.25407	97.6121	10.9385	11.2973	28.8538	221.845	222.322	90.0871	9.08399	9.22779	92.4158	4.62449	4.90496	-220.29	-2.58488	2462.62	90.0392	4.67073	91.6686	2473.19	175.669	10.7485	1371.67	447634	1.0029	0.0258382	22.8092	0.215935	4.92705	7.87419
CSUF-4_M_408	Sweeps 23-41	405.897	127.46	6.72953	0.31402	5523.84	263.942	6.84341		0.00443123	12.0392	0.099244	8.24194	0.0144681	5.11575	0.620697	69.1175	5.11575	0.0497498	6.4621	89.3668	10.7353	11.0455	183.355	150.522	151.184	96.0783	7.55561	7.74934	92.5992	4.70328	4.97914	49.4973	3.6211	41.5385	96.1495	4.71623	92.762	866.886	107.699	1.41395	298.518	417367	0.584264		9.97881	0.0173263	0.107938	0.705303
CSUF-4_M_396	Sweeps 23-41	564.682	223.113	9.57844	0.395113	7555.15	421.752	15.0985		0.00440976	6.36565	0.0954328	5.41149	0.014528	4.48397	0.828601	68.8324	4.48397	0.0476419	3.02956	88.9348	5.64885	6.21141	81.4785	71.9139	73.3429	92.5517	4.78694	5.06692	92.98	4.13927	4.45242	-14.116	-0.462782	100.848	92.5429	4.15385	93.2398	1039.32	135.986	3.55836	497.074	418584	1.09974		16.6388	0.00942126	0.376261	1.65445
CSUF-4_M_403	Sweeps 23-41	415.15	230.63	7.35085	0.555534	4383.17	852.986	40.4613		0.0042535	9.5945	0.107848	9.17986	0.0145613	3.93819	0.429003	68.675	3.93819	0.053717	8.2922	85.7901	8.21369	8.58414	359.212	187.133	187.633	103.995	9.07402	9.26194	93.1915	3.64366	3.99747	74.0566	10.3887	13.5533	104.215	3.65859	93.8776	869.324	127.073	7.85453	574.271	443863	0.509078	0.0398388	15.629	0.103901	1.54918	2.73018
CSUF-4_M_352	Sweeps 23-41	443.892	181.766	7.61895	0.409483	5766.29	217.383	4.04509		0.00474107	7.71642	0.0907123	8.93763	0.0145647	3.6972	0.413667	68.6593	3.6972	0.0451715	8.13707	95.6007	7.35954	8.08103	-46.3656	197.879	198.447	88.1667	7.54759	7.76002	93.2128	3.42147	3.90967	301.038	-5.72329	858.024	88.0627	3.46991	93.0534	709.675	271.93	9.95928	957.332	441010	1.03562		12.2973	0.0316314	0.906489	2.69451
CSUF-4_M_317	Sweeps 23-41	188	102.594	3.32365	0.545709	2616.07	278.207	7.54057		0.00438447	12.9412	0.0949164	8.63418	0.0145979	4.14998	0.480646	68.5029	4.14998	0.0471573	7.57143	88.4259	11.4184	11.8431	57.2067	180.542	181.139	92.0729	7.59996	7.82779	93.4239	3.84912	4.28857	-63.3095	-1.46735	515.443	92.0452	3.88496	93.8783	1434.75	124.93	8.37575	650.59	444444	1.17654		16.9725	0.0399723	0.998704	2.36618
CSUF-4_L_274	Sweeps 23-41	448.772	59.2506	7.18127	0.132028	5479.99	582.766	17.0487		0.004707	18.8699	0.102213	7.61038	0.0146393	5.09834	0.669919	68.3094	5.09834	0.050639	5.6502	94.9154	17.8684	18.1991	224.4	130.632	131.404	98.8171	7.166	7.43962	93.6868	4.74193	5.10464	58.2501	5.19178	24.3959	98.9218	4.7461	93.6615	438.016	63.2938	0.832709	93.7281	455570	0.197593		2.76544			0.299347
CSUF-4_M_324	Sweeps 23-41	271.456	162.045	4.95262	0.596946	3893.21	574.924	11.1002		0.0048343	10.1211	0.0970462	8.23564	0.0146549	4.40078	0.534358	68.2364	4.40078	0.0480279	6.96125	97.4762	9.84195	10.4283	100.674	164.645	165.29	94.0461	7.39744	7.64115	93.7863	4.09745	4.5164	6.8413	0.276282	152.41	94.0514	4.12519	93.416	1722.58	189.862	10.9848	779.002	438927	0.885668	0.0124312	13.4525	0.0903682	1.23603	2.91805
CSUF-4_M_332	Sweeps 23-41	1329.34	563.73	23.2021	0.424069	15975.7	491.85	8.57742		0.00473083	7.11278	0.0966168	4.49702	0.014747	3.42181	0.760907	67.8105	3.42181	0.047517	2.91794	95.3948	6.76924	7.5588	75.2484	69.3449	70.8758	93.6486	4.02302	4.45237	94.3709	3.20568	3.73275	-25.4126	-0.771298	115.652	93.6338	3.21935	94.3	1058.85	285.484	4.6058	1647.73	450091	4.24892		19.946	0.0695872	1.32484	3.48385
CSUF-4_M_320	Sweeps 23-41	1166.79	426.703	20.1985	0.365705	15674.7	712.414	32.3451		0.00499525	5.95384	0.0976822	5.55183	0.0147759	3.90961	0.704201	67.6778	3.90961	0.0479469	3.9418	100.713	5.9814	6.96812	96.6505	93.3016	94.435	94.6346	5.01655	5.37318	94.5547	3.66974	4.13893	2.16846	0.0844035	94.518	94.6362	3.68515	94.1903	643.562
CSUF-4_M_358	Sweeps 23-41	1027.19	791.509	19.7193	0.770558	13801.3	352.414	24.5274		0.00474024	5.09837	0.101388	7.55737	0.0148094	5.92515	0.784023	67.5246	5.92515	0.049653	4.6911	95.5841	4.86172	5.58977	178.747	109.365	110.277	98.0564	7.06391	7.28117	94.7676	5.57405	5.82246	46.9822	3.35397	32.5882	98.1236	5.58014	94.6587	2249.67	230.131	13.1052	1579.8	452896	3.58436	0.0844776	51.0493	0.324836	5.31729	8.40069
CSUF-4_M_329	Sweeps 23-41	192.227	107.995	3.51051	0.561808	2533.99	128.83	7.22668		0.00477855	8.09598	0.102027	9.40702	0.0148377	5.0815	0.540182	67.3959	5.0815	0.049871	7.91646	96.3546	7.78228	8.49309	188.953	184.215	184.772	98.6458	8.84312	9.06739	94.9472	4.78939	5.16124	49.7508	3.7494	49.0547	98.7213	4.81027	94.8151	1549.71	185.186	6.64096	1144.28	439815	0.404924	0.0071578	7.19358	0.162947	2.7984	4.7853
CSUF-4_L_297	Sweeps 23-41	575.614	280.108	10.3691	0.486624	8111.18	266.813	7.93096		0.00491657	9.945	0.10368	6.02424	0.0148694	5.20559	0.864107	67.2521	5.20559	0.0505709	3.03205	99.1309	9.83443	10.4583	221.333	70.138	71.5702	100.168	5.74625	6.09389	95.1488	4.91668	5.27931	57.0109	5.01055	13.8027	100.27	4.91291	94.8291	1258.26	275.718	13.1628	744.288	422827	0.619586	0.00668684	9.34444	0.059682	1.05509	2.94367
CSUF-4_M_370	Sweeps 23-31	937.74	438.542	16.6092	0.467659	13095.8	492.964	5.42405		0.0045197	11.8123	0.1003	9.67337	0.0148709	5.41143	0.559414	67.2456	5.41143	0.0489176	8.01814	91.1471	10.7424	11.3139	143.88	188.132	189.705	97.0537	8.95364	9.21656	95.1579	5.11158	5.49002	33.863	1.95327	86.551	97.0924	5.13784	95.4663	1487.67	136.601	3.777	504.912	445165	2.05285	0.0943536	17.8133	0.068594	0.968529	1.83603
CSUF-4_L_259	Sweeps 23-41	404.41	292.293	7.72168	0.722764	5598.03	114.531	3.69928		0.00484864	7.0549	0.0937965	9.09745	0.014909	3.14366	0.345554	67.0737	3.14366	0.0456287	8.53704	97.7647	6.88055	7.7582	-22.002	206.647	207.183	91.0338	7.92135	8.13375	95.4	2.97696	3.54349	533.597	-4.7962	4072.45	90.944	3.03034	95.1065	1326.18	179.565	8.22554	1069.92	418555	0.680143	0.0204074	15.5251	0.284892	4.07328	7.02056
CSUF-4_L_283	Sweeps 23-41	1224.31	617.326	22.1186	0.504225	15040.7	869.502	15.1414		0.00454233	4.84991	0.104042	5.06262	0.0150213	3.93246	0.776765	66.5721	3.93246	0.0502343	3.18839	91.6023	4.43258	5.53445	205.81	73.9652	75.3312	100.501	4.84427	5.2536	96.1134	3.75159	4.22352	53.3	4.36534	16.882	100.59	3.75312	96.4896	1291.41
CSUF-4_M_321	Sweeps 23-41	351.32	152.381	6.31402	0.433738	5177.46	525.139	23.9442		0.0050684	8.96142	0.103334	6.44062	0.0150245	4.11678	0.63919	66.5581	4.11678	0.049882	4.95316	102.184	9.13407	9.82717	189.518	115.244	116.133	99.8494	6.12484	6.45122	96.1336	3.92825	4.38382	49.2746	3.72139	30.9153	99.9252	3.93795	95.7044	1158.94	250.57	9.77175	799.975	450511	0.731731		9.63739	0.0264934	1.05999	3.12392
CSUF-4_L_301	Sweeps 23-41	433.387	381.177	8.75303	0.87953	5610.86	297.001	22.7211		0.00494768	6.94084	0.096582	10.2219	0.0151447	5.95882	0.582947	66.0297	5.95882	0.0462524	8.30538	99.7567	6.90689	7.7772	10.8029	199.786	200.334	93.6164	9.14147	9.33736	96.8971	5.73074	6.05613	-796.951	-3.50442	16588	93.5491	5.77808	96.4534	2317.15	228.26	10.0401	1252.16	455515	2.34954		43.8444	0.137403	2.38723	5.0634
CSUF-4_M_384	Sweeps 23-41	612.848	368.79	11.5431	0.601765	8354.03	1625.74	23.2107		0.00479835	7.7514	0.0959281	7.81633	0.015252	5.16773	0.661145	65.5651	5.16773	0.045616	5.86427	96.7529	7.48178	7.99068	-22.6737	141.968	142.727	93.0107	6.94699	7.14483	97.5786	5.00462	5.29251	530.36	-4.91111	2694.72	92.917	5.04499	97.6621	1796.42	171.598	2.59926	1200.85	439958	0.939797	0.0465878	23.4573	0.332689	5.12036	9.51968
CSUF-4_L_287	Sweeps 23-41	366.811	198.919	6.83242	0.542294	5087.68	182.847	3.32512		0.00474642	7.95944	0.108768	5.82299	0.0152637	3.57868	0.614578	65.5148	3.57868	0.0516821	4.5935	95.7083	7.59984	8.34897	271.348	105.302	106.244	104.838	5.80012	6.17433	97.653	3.46835	3.98944	64.0119	6.85346	14.0244	104.984	3.47032	97.8284	1368.75	225.107	8.77304	1153.08	446105	0.550353		10.0235	0.155022	2.33756	4.12541
CSUF-4_L_304	Sweeps 23-41	392.796	165.272	7.21976	0.420758	5347.03	201.577	6.22289		0.0054867	7.963	0.110363	7.46791	0.0152714	4.69511	0.628705	65.4818	4.69511	0.0524134	5.80737	110.595	8.78261	9.63304	303.485	132.362	133.105	106.297	7.53679	7.83675	97.7018	4.55262	4.96251	67.8067	8.08622	14.1207	106.471	4.54962	96.8165	1131.27	186.209	9.88789	564.337	432315	0.717479		9.58404	0.0341368	0.270954	1.6034
CSUF-4_M_333	Sweeps 23-41	682.451	570.507	13.8073	0.835967	8868.76	1237.83	15.2002		0.00506449	6.12858	0.0994175	7.94567	0.0152771	5.38173	0.677317	65.4575	5.38173	0.0471977	5.84556	102.106	6.24186	7.20464	59.234	139.336	140.109	96.2385	7.2956	7.55377	97.7377	5.22031	5.58325	-65.0027	-1.55782	388.236	96.2078	5.25012	97.0987	2169.69	386.427	12.0208	3169.11	428593	1.42463	0.0280977	15.7935	0.338638	6.12936	12.0291
CSUF-4_M_369	Sweeps 23-41	193.284	93.6877	3.55787	0.484714	2680.3	89.743	2.81234		0.00497465	15.4066	0.0982688	12.204	0.0152834	5.29917	0.434217	65.4303	5.29917	0.046633	10.9934	100.299	15.4144	15.685	30.4933	263.461	263.863	95.177	11.0876	11.2188	97.7781	5.14233	5.42541	-220.655	-2.73288	2770.5	95.1237	5.2034	97.5766	1325.29	223.886	12.1811	923.081	439690	0.656414	0.0130989	7.37158	0.0379583	1.14013	3.9504
CSUF-4_L_286	Sweeps 23-41	412.003	315.73	8.03281	0.76633	5452.79	404.227	9.36653		0.00496391	6.03527	0.0438957	11.8337	0.0153746	5.19219	0.438762	65.0422	5.19219	0.0207069	10.6338	100.083	6.02536	7.02692	-2485.98	449.675	450.427	43.6204	5.05261	5.13343	98.3571	5.06813	5.44311	103.956	-125.484	0.744132	42.4437	5.29517	98.1284	2109.74
CSUF-4_M_346	Sweeps 23-41	43.4496	25.1891	0.831399	0.579732	571.519	23.8026	0.499691		0.00466892	22.1198	0.143902	11.7659	0.0153844	8.91222	0.757462	65.0009	8.91222	0.06784	7.68171	94.1493	20.7772	21.0369	863.693	159.332	159.845	136.514	15.0291	15.2745	98.4191	8.70471	8.93062	88.6048	27.9053	2.33127	137.265	8.49917	98.8335	1512.92	145.184	7.89651	360.666	446271	0.366099	0.0278089	10.1467	0.0287273	0.790001	2.03586
CSUF-4_L_278	Sweeps 23-41	2095.73	109.627	34.4212	0.0523094	27250.6	1858	23.2953		0.00503784	8.24172	0.101973	6.34494	0.0154213	4.35702	0.686693	64.8453	4.35702	0.0479583	4.61243	101.57	8.35012	9.12553	97.253	109.161	110.129	98.5962	5.96173	6.28693	98.6534	4.26563	4.70712	-1.43994	-0.0580407	113.945	98.595	4.28528	98.6299	124.33	153.737	1.59287	620.709	438631	4.77208		9.02931			0.990276
CSUF-4_M_347	Sweeps 23-41	198.824	83.5295	3.62159	0.420117	2504.95	70.1287	1.5575		0.00481813	14.026	0.103213	11.9759	0.0154423	5.33769	0.445702	64.7573	5.33769	0.0484753	10.7206	97.151	13.5937	14.0121	122.569	252.531	252.948	99.7376	11.3766	11.5559	98.7865	5.23272	5.60316	19.4031	0.953615	166.11	99.757	5.28156	98.8985	1053.25	172.981	5.42654	804.453	464718	0.806383		10.7087	0.0506135	0.629654	1.70804
CSUF-4_M_353	Sweeps 23-41	217.567	144.09	4.23674	0.662281	2929.12	1168.31	30.9783		0.0049709	12.3146	0.0989717	9.61102	0.0154634	4.27102	0.444388	64.6689	4.27102	0.0464201	8.60988	100.224	12.3116	12.6462	19.4832	206.771	207.284	95.8267	8.78869	8.95718	98.9205	4.19267	4.54635	-407.721	-3.22846	5388.37	95.7634	4.24205	98.7739	1890.67	148.205	6.39735	980.395	455119	0.476117		11.6556	0.080699	2.63355	5.37858
CSUF-4_L_264	Sweeps 23-41	339.489	119.657	6.09897	0.352462	4626.51	151.907	3.09634		0.00491197	14.159	0.101242	7.96694	0.0154996	5.43583	0.682299	64.5179	5.43583	0.0473741	5.82442	99.0385	13.9885	14.4487	68.1053	138.602	139.373	97.9225	7.43705	7.6963	99.1503	5.34841	5.70943	-45.5837	-1.2538	296.383	97.8974	5.37778	99.1566	1026.16	373.44	12.6626	819.043	438145	0.740378		7.62033	0.0348191	1.11386	1.63546
CSUF-4_L_280	Sweeps 23-41	576.038	375.275	11.1289	0.651475	7578.08	805.891	31.6294		0.00473301	5.32275	0.100777	7.93921	0.0155054	4.83711	0.609269	64.4936	4.83711	0.0471389	6.29551	95.4386	5.06798	6.13455	56.2376	150.147	150.863	97.4938	7.38026	7.63989	99.1873	4.76108	5.16458	-76.3719	-1.73702	470.966	97.4592	4.79337	99.601	1754.4	274.564	14.5962	1426.16	427046	0.598628	0.0150749	11.6819	0.150074	3.03353	7.61083
CSUF-4_M_357	Sweeps 23-41	108.259	72.367	2.0347	0.66846	1612.19	126.812	4.81374		0.00396767	17.0683	0.0876687	10.934	0.0155066	4.75853	0.435206	64.4886	4.75853	0.041004	9.8442	80.0365	13.6339	13.8282	-287.353	250.972	251.448	85.3294	8.94862	9.0812	99.195	4.68409	5.00419	134.52	-16.2495	30.1937	85.0427	4.77098	101.37	1751.76	220.319	14.1802	609.824	434015	0.659353		11.249	0.0755837	1.31478	2.33172
CSUF-4_M_351	Sweeps 23-41	822.535	465.791	15.7963	0.566287	11364.8	448.078	19.0673		0.00515018	5.50095	0.104317	5.79899	0.0155314	3.91489	0.675099	64.3858	3.91489	0.048713	4.27807	103.829	5.69695	6.75282	134.049	100.56	101.6	100.754	5.56217	5.92724	99.3521	3.85971	4.3542	25.8838	1.39108	55.6742	100.782	3.87415	98.9285	1480.18	202.578	5.76627	830.425	447260	1.8025		15.0564	0.0738059	1.47876	3.27204
CSUF-4_M_341	Sweeps 23-41	399.191	152.255	7.21958	0.381409	4510.19	542.879	17.2097		0.00448486	9.00717	0.110422	9.02212	0.0155741	4.17185	0.462402	64.2091	4.17185	0.0514221	7.99964	90.4459	8.12842	8.72534	259.789	183.767	184.312	106.351	9.10971	9.36108	99.6234	4.12418	4.59214	61.6522	6.3259	27.1725	106.487	4.14593	100.19	1038.4	197.693	25.2208	797.37	440976	0.841666	0.0554183	8.89441	0.0702864	1.58392	2.80066
CSUF-4_M_375	Sweeps 23-41	474.869	254.637	9.07336	0.536226	6829.06	1740.28	102.969		0.00517154	8.6174	0.0975964	7.07245	0.0156262	5.26536	0.744489	63.9953	5.26536	0.0452982	4.72181	104.259	8.96124	9.45579	-39.5759	114.678	115.622	94.5553	6.38544	6.60748	99.9537	5.22233	5.51288	352.562	-5.70936	731.96	94.4446	5.26339	99.57	1353.46
CSUF-4_M_318	Sweeps 23-41	208.41	110.081	3.94583	0.528194	3030.31	455.77	8.00346		0.0047852	11.8227	0.105163	8.71133	0.0156428	3.6572	0.419821	63.9271	3.6572	0.0487579	7.90646	96.4885	11.3804	11.8854	136.247	185.769	186.333	101.531	8.41684	8.66481	100.06	3.63112	4.15733	26.5601	1.44889	100.169	101.561	3.66845	100.373	1184.08	318.641	9.79499	1313.49	456811	1.38646		10.8782	0.028041	1.06972	2.48031
CSUF-4_M_350	Sweeps 23-41	212.724	69.49	3.94888	0.326667	2805.69	96.7129	6.9731		0.00542991	16.0232	0.126565	12.1102	0.0158717	4.43404	0.366139	63.0054	4.43404	0.0578348	11.2693	109.453	17.4905	17.9034	523.522	247.164	247.534	121.006	13.8146	14.0277	101.512	4.46582	4.9175	80.6098	16.1103	9.19411	121.396	4.49045	101.095	941.974
CSUF-4_L_294	Sweeps 23-41	158.677	65.0676	2.99996	0.410064	2288.48	337.947	9.81161		0.00557734	14.2859	0.100222	15.4564	0.0158922	6.70904	0.434063	62.924	6.70904	0.045738	13.9244	112.417	16.0152	16.5165	-16.215	336.681	337.01	96.981	14.2961	14.4308	101.642	6.76573	7.07026	726.839	-4.80624	13015.4	96.8856	6.85465	100.923	1185.11	245.863	6.18389	600.653	441246	0.929942		11.7147	0.0289401	0.376981	1.53104
CSUF-4_M_365	Sweeps 23-41	1033.27	382.877	19.2358	0.370551	14513	423.075	7.50012		0.00523355	4.71055	0.106792	4.54378	0.0159027	3.34487	0.736143	62.8824	3.34487	0.048704	3.07535	105.505	4.95694	5.81876	133.624	72.2939	73.6885	103.026	4.45162	4.81982	101.709	3.37533	3.82614	23.8841	1.2787	41.2581	103.053	3.38622	101.481	531.941	2104.82	2.30703	1438.31	431532	7.2508	47.1199	139.324	16.4523	74.8438	18.2836
CSUF-4_M_306	Sweeps 23-41	1721.76	1266.79	35.4441	0.735753	22657.8	1365.13	76.658		0.00495718	6.25108	0.105049	5.79977	0.0161769	4.63162	0.798587	61.8166	4.63162	0.0470971	3.49076	99.9478	6.2324	7.1847	54.1552	83.2856	84.5724	101.426	5.59822	5.96316	103.448	4.7531	5.19245	-91.0223	-1.99395	293.906	101.385	4.77735	103.891	2144.16	246.74	4.42572	1943.23	460658	1.972		26.9056	0.278534	4.76408	8.75091
CSUF-4_L_270	Sweeps 23-41	302.403	160.375	5.98822	0.530335	4362.41	247.393	3.5918		0.00543405	5.86013	0.0998605	10.9761	0.016196	4.88422	0.444986	61.7437	4.88422	0.0447182	9.82953	109.536	6.40162	7.54336	-71.0246	240.18	240.65	96.6475	10.1189	10.3064	103.57	5.01815	5.43487	245.822	-7.16218	493.17	96.5059	5.08865	103.044	1329.02	165.891	6.64502	570.45	441499	1.41011		13.5679	0.0228871	1.13891	2.06995
CSUF-4_M_327	Sweeps 23-41	423.282	154.901	8.02316	0.365952	5971.63	264.683	5.5728		0.00537129	9.48369	0.106686	6.0149	0.0162152	4.01699	0.66784	61.6704	4.01699	0.047718	4.47692	108.275	10.241	10.9316	85.313	106.192	107.194	102.929	5.88764	6.24647	103.692	4.13197	4.63457	-21.5428	-0.740791	151.366	102.914	4.15447	103.421	925.034	169.755	3.75509	481.607	451362	0.874317		10.0011		0.259549	1.11599
CSUF-4_M_402	Sweeps 23-41	785.134	326.411	15.0855	0.415739	12198.7	1097.31	18.3751		0.00520603	7.2497	0.113873	6.40266	0.0162237	4.22391	0.659711	61.6381	4.22391	0.0509058	4.81172	104.952	7.58899	8.17897	236.582	110.998	111.877	109.502	6.64621	6.92616	103.746	4.34704	4.7161	56.1481	5.25661	20.6561	109.618	4.35217	103.664	1100	282.206	12.0357	1415.57	427932	3.36098	0.0695257	19.475	0.155685	2.75652	6.5339
CSUF-4_M_361	Sweeps 23-41	82.1649	43.3069	1.6363	0.527073	1287.48	98.7828	1.25345		0.00523713	17.3291	0.110132	14.008	0.0163558	6.83607	0.48801	61.1405	6.83607	0.0488359	12.2267	105.577	18.2479	18.5007	139.99	287.081	287.435	106.086	14.1106	14.2381	104.583	7.09169	7.33004	25.2925	1.4164	153.288	106.116	7.146	104.496	1396.47	199.409	9.71136	490.07	424951	0.698238		7.90789	0.0752688	1.03233	1.89426
CSUF-4_M_389	Sweeps 23-41	200.572	91.2553	3.92065	0.454974	3016.37	319.622	15.3341		0.0051069	10.0191	0.103114	12.1375	0.0164759	5.45602	0.449518	60.6946	5.45602	0.0453907	10.8421	102.959	10.2893	10.7141	-34.6435	263.074	263.486	99.6469	11.5201	11.6572	105.345	5.70094	5.99579	404.083	-5.71859	2309.18	99.5305	5.77615	105.523	1284.77	211.776	4.96303	802.297	432958	0.561384		8.32174	0.0354374	1.11484	2.61467
CSUF-4_M_379	Sweeps 23-41	174.587	66.8388	3.44974	0.382838	2704.26	259.978	15.9728		0.00632042	10.9278	0.116401	12.4535	0.0164955	5.63321	0.45234	60.6227	5.63321	0.0511788	11.1066	127.347	13.8725	14.3539	248.864	255.645	256.027	111.804	13.1843	13.3337	105.469	5.89296	6.18005	57.6197	5.66585	43.5995	111.932	5.92999	104.112	675.564	139.629	5.37995	490.202	397677	0.545843	0.381867	7.75934	0.0848016	0.500482	1.05477
CSUF-4_L_269	Sweeps 23-41	766.923	266.129	14.9943	0.347008	12186.5	496.385	39.1359		0.00644938	9.99618	0.111245	3.87292	0.0165064	2.58936	0.668583	60.5824	2.58936	0.0488794	2.88005	129.937	12.9471	13.7851	142.059	67.5976	69.1232	107.104	3.93676	4.48916	105.539	2.71053	3.44504	25.7078	1.4612	35.4028	107.135	2.7212	104.175	926.796	442.979	2.75245	853.588	417385	1.21024	0.213986	13.4296	0.0732011	1.10537	2.5451
CSUF-4_L_299	Sweeps 23-41	293.796	192.168	6.3398	0.654086	4657.95	140.775	3.03771		0.00592734	11.295	0.130281	9.61473	0.016757	5.44446	0.566262	59.6765	5.44446	0.0563877	7.9247	119.451	13.4521	14.1172	467.657	175.485	176.014	124.351	11.2529	11.525	107.128	5.78432	6.17557	77.0927	13.8503	8.6843	124.694	5.76113	105.762	1931.18	296.097	10.3475	1490.4	413647	1.14888	0.0707211	13.5937	0.21253	3.20932	6.32492
CSUF-4_M_330	Sweeps 23-41	189.985	70.5556	3.79087	0.371375	2790.36	283.022	9.27056		0.00614339	11.452	0.122278	8.88882	0.0167852	3.93312	0.442479	59.5764	3.93312	0.0528351	7.9713	123.791	14.1332	14.792	321.72	181.093	181.634	117.135	9.83384	10.1128	107.306	4.18554	4.71556	66.6461	8.39152	18.8196	117.333	4.20636	106.316	1070.5	179.377	6.14038	633.049	453984	1.13392		11.018	0.0286747	0.420215	1.50805
CSUF-4_M_405	Sweeps 23-31	477.563	299.913	9.93612	0.628008	8203.13	8038.7	116.078		0.00505998	8.04997	0.105279	11.6675	0.0168646	6.52742	0.559451	59.2957	6.52742	0.0452757	9.6708	102.015	8.1915	9.10883	-40.7419	234.922	236.278	101.638	11.2845	11.5154	107.81	6.97868	7.34156	364.616	-6.07233	1525.9	101.512	7.05292	108.423	1623.41	262.337	6.35482	1742.39	428345	1.46544	0.0218101	21.909	0.348833	5.18486	9.80322
CSUF-4_M_412	Sweeps 23-41	174.769	82.0267	3.54729	0.469342	2534.13	96.7536	2.25085		0.00542065	14.9648	0.11355	9.6316	0.0169293	4.87966	0.506631	59.0692	4.87966	0.0486461	8.30401	109.267	16.3075	16.6144	130.836	195.307	195.828	109.208	9.97257	10.1607	108.22	5.23668	5.57387	17.2863	0.904854	123.536	109.228	5.27609	108.139	1382.23	144.756	5.03787	354.021	438975	0.641144		8.95036	0.0240577	0.329721	1.08658
CSUF-4_L_296	Sweeps 23-41	42.2653	24.996	0.96362	0.591408	633.93	17.7475	1.06728		0.00701757	27.3019	0.233579	21.7221	0.016955	10.2557	0.472131	58.9797	10.2557	0.0999162	19.1487	141.345	38.4552	38.788	1622.53	356.256	356.44	213.149	41.7637	41.9635	108.383	11.0225	11.2375	93.3202	49.1518	1.61637	215.073	10.5449	105.113	1665.39
CSUF-4_M_348	Sweeps 23-41	459.111	249.634	9.51389	0.543733	6547.03	181.459	3.81669		0.00529554	7.70388	0.114648	5.84339	0.0170115	3.99817	0.684221	58.7837	3.99817	0.0488792	4.26144	106.752	8.20235	9.01139	142.028	100.022	101.064	110.209	6.10274	6.49729	108.741	4.31119	4.84182	23.437	1.33178	54.004	110.238	4.3281	108.921	1360.56	175.695	4.6645	970.19	450002	0.629957	0.0215749	15.3679	0.0418233	1.54686	2.26117
CSUF-4_L_272	Sweeps 23-41	541.921	395.142	11.8461	0.729151	7418.19	428.841	23.0058		0.00554925	6.5767	0.10903	7.19118	0.0170225	4.83179	0.671904	58.7458	4.83179	0.0464537	5.32606	111.852	7.33586	8.38974	21.19	127.869	128.72	105.078	7.17848	7.48471	108.811	5.21337	5.65549	-413.499	-3.55269	3098.76	105.002	5.25226	108.43	1923.77	226.186	4.5062	1553.01	437999	1.17023	0.036791	16.0301	0.314188	4.63373	7.17056
CSUF-4_L_275	Sweeps 23-41	159.997	77.4145	3.28477	0.48385	2180	71.5782	2.67495		0.00541694	16.701	0.10924	15.2855	0.0171169	5.01581	0.328142	58.4217	5.01581	0.0462866	14.4391	109.192	18.187	18.6152	12.5785	347.215	347.53	105.27	15.285	15.4317	109.409	5.44144	5.87101	-769.809	-3.93185	24010.1	105.186	5.54853	109.426	864.265	223.169	12.2374	572.631	431328	0.883065		9.56039	0.0216958	0.351587	1.61076
CSUF-4_M_372	Sweeps 23-41	154.937	74.8541	3.23815	0.483125	2372.14	305.283	9.03151		0.00534515	10.4874	0.133646	12.3768	0.0173481	5.27798	0.426441	57.6433	5.27798	0.0558731	11.195	107.749	11.27	11.6932	447.33	248.775	249.14	127.368	14.8155	14.9858	110.874	5.80186	6.12344	75.2143	12.9502	13.8451	127.697	5.81768	111.122	1274.39	173.099	11.6952	586.157	442328	0.689124		9.9966	0.0294692	0.27623	1.36622
CSUF-4_L_277	Sweeps 23-41	189.447	83.9876	3.96079	0.443331	2674.02	222.188	6.89167		0.0056733	10.9637	0.130789	10.6882	0.0174434	5.45699	0.510562	57.3283	5.45699	0.0543798	9.19014	114.346	12.5011	13.1729	386.8	206.393	206.856	124.806	12.5523	12.7976	111.478	6.03103	6.43568	71.1795	10.6791	15.4572	125.072	6.03372	111.27	1228.47	243.685	14.8102	820.153	446232	0.913983		10.5222	0.0868253	1.36158	2.85745
CSUF-4_L_298	Sweeps 23-41	477.206	375.346	10.8246	0.78655	7818.83	514.409	6.11326		0.00560133	5.79373	0.1108	8.31796	0.017474	6.17797	0.742727	57.2278	6.17797	0.0459881	5.56966	112.899	6.52283	7.67756	-2.98506	134.328	135.147	106.697	8.42463	8.69573	111.672	6.83964	7.20148	3841.02	-4.66267	168347	106.596	6.8917	111.505	1001.15	282.402	19.558	1979.45	428941	0.679319	0.0541801	12.3257	0.380738	5.85425	9.83637
CSUF-4_L_258	Sweeps 23-41	296.878	119.271	6.09932	0.401751	4576.86	187.409	3.12483		0.00480348	7.19587	0.118383	9.48614	0.0177565	3.80075	0.400663	56.3174	3.80075	0.0483537	8.69144	96.8562	6.95298	7.808	116.593	204.964	205.477	113.605	10.1957	10.4474	113.461	4.27465	4.84588	2.68595	0.126244	171.112	113.608	4.32809	114.543	1286.38	445.17	6.76559	1801.6	443922	4.31415		14.9828	0.0602033	1.24169	3.65704
CSUF-4_S_451	Sweeps 23-41	237.521	209.001	5.54688	0.879928	3571.28	138.848	13.7626		0.00533769	8.36881	0.117957	9.79177	0.0178009	4.56676	0.466388	56.1768	4.56676	0.0480597	8.6616	107.599	8.98086	9.51203	102.194	204.808	205.307	113.218	10.4904	10.6858	113.743	5.1488	5.53418	-11.3004	-0.463106	223.114	113.208	5.19958	114.693	2409.87	264.923	4.27763	1415.33	440845	1.85473	0.0422338	20.4867	0.219278	3.29738	5.88831
CSUF-4_L_263	Sweeps 23-35	190.71	93.5534	4.07322	0.490553	3127.59	77.8531	1.7473		0.00537683	14.4465	0.110308	12.4012	0.0179206	5.55174	0.447677	55.8018	5.55174	0.044643	11.0891	108.386	15.6161	16.1844	-75.1394	271.172	271.607	106.247	12.51	12.71	114.5	6.30065	6.75075	252.384	-7.76818	550.006	106.079	6.39348	114.994	1367.5	263.548	9.67559	899.505	437444	0.912278		10.8084	0.0824345	0.863619	2.31134
CSUF-4_L_279	Sweeps 23-41	265.837	132.93	5.73014	0.500044	4214.81	278.139	10.9746		0.00544932	8.13531	0.119861	7.78405	0.0179609	4.66064	0.598743	55.6765	4.66064	0.0484002	6.23457	109.843	8.91187	9.75962	118.856	146.964	147.678	114.946	8.45956	8.7689	114.756	5.30104	5.78346	3.44944	0.165089	119.467	114.949	5.33364	115.161	3266.99	195.523	6.50911	614.66	423890	0.907592		11.9978	0.0280959	0.291271	1.6585
CSUF-4_M_385	Sweeps 23-41	282.421	149.571	6.0473	0.529602	4374.42	219.753	12.5438		0.00505107	8.63621	0.105744	11.5478	0.0179704	5.20108	0.450395	55.6471	5.20108	0.0426772	10.3102	101.836	8.77266	9.25647	-186.441	257.646	258.092	102.064	11.2132	11.3606	114.816	5.91881	6.255	161.583	-12.4936	85.1617	101.805	6.01993	115.954	1472.65	144.835	6.89466	725.598	432286	0.487504		9.04054	0.0390767	1.03782	2.35293
CSUF-4_M_407	Sweeps 23-41	252.439	154.566	5.74656	0.612292	4213.27	134.682	4.92261		0.00644139	9.76416	0.116731	9.4874	0.0179735	3.46962	0.365708	55.6374	3.46962	0.0471034	8.83021	129.777	12.631	13.1818	54.428	210.672	211.169	112.104	10.0697	10.2651	114.836	3.94909	4.43716	-110.986	-2.4367	816.688	112.049	4.0128	113.299	1515.5	204.205	7.46624	1013.34	419445	0.575187		11.2957	0.0148808	1.21654	3.40257
CSUF-4_L_265	Sweeps 23-41	308.29	125.984	6.53517	0.408655	5039.09	744.138	35.363		0.00563086	10.3823	0.119355	6.55686	0.0180314	4.20336	0.641063	55.4587	4.20336	0.0480073	5.03231	113.493	11.7501	12.4589	99.5922	119.05	119.937	114.487	7.099	7.4615	115.203	4.79937	5.33016	-15.6743	-0.625267	138.358	114.472	4.82845	115.316	1172.25	237.625	3.63378	692.958	419351	1.30231		11.7349		0.299276	0.927774
CSUF-4_M_312	Sweeps 23-41	103.626	83.4815	2.42373	0.8056	1583.28	131.557	5.91863		0.00545953	13.8728	0.127115	13.0581	0.018069	6.9881	0.535156	55.3434	6.9881	0.0510225	11.0308	110.049	15.2253	15.7212	241.847	254.221	254.618	121.502	14.9533	15.1508	115.44	7.99528	8.32844	52.2673	4.98896	50.2837	121.623	8.02805	116.194	2322.35	214.352	18.2575	1088.42	471032	0.496762		12.6341	0.149443	3.59618	5.34647
CSUF-4_M_388	Sweeps 23-41	264.917	159.649	6.00812	0.602637	4476.64	170.604	4.30775		0.0057725	8.2182	0.114716	8.81179	0.0183686	4.85404	0.550857	54.4409	4.85404	0.0452946	7.35432	116.339	9.53352	10.1129	-39.7688	178.62	179.227	110.27	9.20773	9.41456	117.337	5.64406	6.01053	395.048	-6.40887	1325.27	110.127	5.70827	117.438	1779.85	222.986	9.22804	822.913	436089	1.19825		15.527	0.0388152	1.37829	2.8303
CSUF-4_M_411	Sweeps 23-41	202.161	112.704	4.47224	0.557499	3434.43	330.17	15.1652		0.00500727	7.21964	0.118717	11.2381	0.0184697	5.33396	0.47463	54.1429	5.33396	0.046618	9.89165	100.955	7.27042	7.84093	29.7305	237.09	237.536	113.908	12.1093	12.2773	117.977	6.2356	6.57292	-296.821	-3.57167	3164.57	113.826	6.30799	119.554	700.624	250.613	8.36791	671.635	439842	0.923841		11.781	0.0279621	0.522591	1.7673
CSUF-4_M_337	Sweeps 23-41	242.348	181.471	5.81999	0.748806	3883.17	573.435	17.1765		0.00625507	7.78841	0.117294	8.92387	0.0184805	3.57357	0.400451	54.111	3.57357	0.046032	8.1771	126.035	9.78554	10.7423	-0.659055	197.125	197.685	112.616	9.51242	9.78037	118.046	4.18006	4.81429	18011.3	-4.82159	5.35732e+06	112.506	4.24423	117.018	1574.62	258.396	9.73704	1193.45	445585	0.845059		15.9393	0.0714273	1.75628	5.54876
CSUF-4_L_268	Sweeps 23-41	502.842	159.44	10.7294	0.317078	8815.75	732.518	21.5928		0.00598344	8.62071	0.129667	5.8511	0.0184998	5.28641	0.90349	54.0548	5.28641	0.050835	2.50784	120.578	10.3637	11.257	233.33	57.8866	59.6035	123.799	6.81942	7.25416	118.167	6.18991	6.63109	49.3562	4.54872	12.8412	123.911	6.18882	118.045	898.977	203.054	2.53863	699.016	420365	2.71132	0.116926	12.2114	0.0306677	0.484484	1.60305
CSUF-4_M_325	Sweeps 23-41	201.72	74.4001	4.46264	0.368829	3535.28	124.324	3.67294		0.00613964	10.0865	0.126172	8.77376	0.0189434	3.83789	0.437428	52.7889	3.83789	0.0483063	7.88983	123.716	12.4404	13.186	114.255	186.143	186.71	120.652	9.98098	10.2713	120.975	4.59957	5.20922	-5.88163	-0.267419	172.549	120.645	4.6508	120.812	1026.53	222.871	4.83869	670.848	447822	1.47648		10.8286	0.0235629	0.361017	1.36769
CSUF-4_L_261	Sweeps 23-41	647.885	301.13	14.7146	0.464789	11146.2	400.591	14.3065		0.00597868	7.5741	0.128614	6.75578	0.0190001	5.07306	0.750922	52.6313	5.07306	0.0490944	4.46145	120.482	9.09829	10.1112	152.302	104.519	105.508	122.852	7.81715	8.19336	121.333	6.09776	6.56776	20.3334	1.23586	54.8187	122.882	6.11993	121.398	1317.74	709.771	1.61023	2166.29	439577	6.65661	0.0177456	15.2022	0.0651793	2.25531	5.68295
CSUF-4_M_342	Sweeps 23-41	143.226	106.079	3.75369	0.74064	2073.02	84.4389	2.20531		0.00796181	10.4939	0.166482	11.9721	0.0191039	4.39305	0.366939	52.3454	4.39305	0.0632039	11.137	160.288	16.7539	17.6679	715.068	236.582	236.945	156.361	17.3497	17.6232	121.99	5.30869	5.85473	82.9401	21.9819	5.69293	157.028	5.31778	117.121	2129.2
CSUF-4_M_395	Sweeps 23-41	47.4873	18.1712	1.0613	0.382653	840.184	32.7658	1.5794		0.00606757	22.7612	0.122862	19.9197	0.0191362	6.31349	0.316947	52.257	6.31349	0.0465649	18.8927	122.268	27.7457	27.9716	26.9973	453.069	453.302	117.663	22.1311	22.2292	122.194	7.64207	7.93897	-352.617	-3.85116	7595.87	117.572	7.8051	122.19	700.334	161.956	8.0743	346.474	423517	0.506445		7.0911	0.0352317	0.33789	0.885692
CSUF-4_L_292	Sweeps 23-41	76.6493	45.201	2.00696	0.589712	1494.8	59.3341	2.05987		0.00757084	13.9272	0.153375	7.45767	0.0206066	3.20591	0.429881	48.528	3.20591	0.0539816	6.73342	152.447	21.1516	21.8517	370.249	151.662	152.295	144.887	10.0697	10.4708	131.489	4.17271	4.94213	64.4864	9.24752	14.5908	145.15	4.19594	129.425	1764.79	196.243	8.18394	1063.1	422323	0.262695		9.68103	0.0305514	1.6914	3.22875
CSUF-4_M_359	Sweeps 23-41	152.141	84.0101	3.90118	0.552186	3042.3	123.92	2.15287		0.00661452	11.5037	0.130847	11.992	0.0210404	4.74172	0.395408	47.5276	4.74172	0.0451034	11.0147	133.254	15.2787	15.7545	-50.0325	268.046	268.453	124.859	14.089	14.2626	134.228	6.29891	6.73189	368.282	-7.50379	1437.36	124.672	6.41033	134.317	1538.62	195.289	5.98818	904.275	451563	0.436739		9.97363	0.0753238	1.60097	3.58589
CSUF-4_L_293	Sweeps 23-35	159.596	80.8752	4.15202	0.50675	2946.06	193.489	2.47854		0.00738688	8.35791	0.15219	10.9156	0.0211687	5.84517	0.535489	47.2395	5.84517	0.0521422	9.21866	148.756	12.3872	13.6584	291.671	210.556	211.049	143.844	14.6399	14.9443	135.038	7.81111	8.32115	53.7018	6.12156	33.5297	144.017	7.83981	133.894	1177.28	183.146	10.8814	639.988	457085	1.12869		13.7893		0.511678	1.92929
CSUF-4_S_450	Sweeps 23-31	186.752	83.3224	4.74557	0.446167	3802.7	289.175	30.8572		0.00681638	11.4619	0.153668	14.2029	0.0212554	3.7895	0.266813	47.0469	3.7895	0.0524339	13.688	137.306	15.6846	16.5806	304.373	311.93	312.834	145.145	19.2091	19.4787	135.585	5.08434	5.84431	55.4543	6.58654	45.6822	145.333	5.2171	135.46	1144.04	197.865	3.93629	847.978	411680	0.580173		7.906	0.0601457	1.12382	2.67085
CSUF-4_M_393	Sweeps 23-41	146.588	47.9691	3.59045	0.327237	12095.2	2353.77	14.6744		0.00641878	13.6667	0.139617	11.4598	0.0213804	6.18009	0.539282	46.7719	6.18009	0.0473612	9.65063	129.323	17.6177	18.0126	67.4824	229.677	230.131	132.703	14.2557	14.4458	136.374	8.33951	8.67741	-102.088	-2.76646	687.92	132.63	8.42308	136.742	1152.07	143.236	3.35496	538.923	444330	1.37766		12.3903	0.064427	0.722456	1.72762
CSUF-4_M_373	Sweeps 23-41	1184.19	565.936	31.7703	0.477909	24431.1	9745.15	101.708		0.00712362	2.83423	0.152212	6.18107	0.0223203	5.05737	0.818204	44.8023	5.05737	0.0494593	3.55367	143.473	4.05196	5.79862	169.655	82.9857	84.1876	143.863	8.29105	8.66677	142.303	7.11796	7.54652	16.1217	1.08408	41.2426	143.894	7.14484	142.212	608.76	232.086	3.42792	4209.09	437892	30.4187	0.00689707	53.1194	0.330833	6.93529	16.6185
CSUF-4_S_439	Sweeps 23-41	270.769	99.5604	7.25915	0.367695	5650.8	138.646	16.1843		0.00713755	7.89183	0.165853	7.44731	0.022982	4.60732	0.618656	43.5123	4.60732	0.05234	5.85107	143.753	11.3045	12.0536	300.295	133.434	134.148	155.814	10.7574	11.0984	146.475	6.67248	7.15838	51.223	5.99347	21.7874	155.995	6.68671	146.635	637.402	132.841	4.00336	396.043	445540	0.568008		7.88309	0.0275725	0.34354	0.902669
CSUF-4_M_319	Sweeps 23-41	396.933	184.333	11.2253	0.464393	8151.47	677.312	35.6657		0.00891831	11.0192	0.156674	6.59432	0.0230021	3.89776	0.591078	43.4743	3.89776	0.0494002	5.31907	179.459	19.6874	20.6891	166.893	124.273	125.104	147.788	9.06956	9.53103	146.601	5.64968	6.37609	12.1585	0.802788	65.4966	147.811	5.68792	144.111	1320.79	159.005	1.67765	309.784	446153	1.05482		13.0772	0.0281192	0.292414	0.804328
CSUF-4_M_401	Sweeps 23-41	70.5814	48.5433	2.08016	0.687764	1473.15	189.59	4.42611		0.0067829	9.9211	0.159157	11.4818	0.0236525	5.9099	0.514717	42.2789	5.9099	0.0488031	9.84407	136.634	13.5099	14.0804	138.359	231.212	231.651	149.965	16.0075	16.2202	150.698	8.80282	9.19215	-8.91821	-0.489083	182.124	149.951	8.88708	152.333	1914.71	148.454	9.47764	319.179	443518	0.487874	0.0393724	6.53466	0.0380312	1.3632	1.84207
CSUF-4_S_442	Sweeps 23-41	142.944	89.9938	4.26089	0.629572	3110.61	238.66	13.094		0.00787168	10.2711	0.163687	8.42714	0.0236651	3.95574	0.469405	42.2563	3.95574	0.0501653	7.44102	158.481	16.214	16.8568	202.647	172.717	173.288	153.925	12.0361	12.3363	150.778	5.89517	6.47323	25.5959	2.04459	63.4815	153.986	5.94987	149.965	1575.36	219.9	6.27535	1373.3	432694	1.40561		11.8189	0.102182	3.04279	5.14628
CSUF-4_L_276	Sweeps 23-41	183.908	138.291	5.59255	0.751957	3558.86	118.276	3.37506		0.00719429	8.21875	0.162594	7.28867	0.0238204	3.02792	0.415428	41.9808	3.02792	0.0495057	6.62996	144.892	11.8657	12.9795	171.878	154.758	155.423	152.972	10.3504	10.7806	151.756	4.54139	5.46933	11.7072	0.794686	79.542	152.995	4.59861	152.638	2195.24	245.119	8.72186	1920.52	441078	1.13432	0.0369876	9.71866	0.392571	6.61432	11.8694
CSUF-4_M_349	Sweeps 23-41	522.085	504.882	17.2247	0.96705	11042.2	1329.12	12.0266		0.00817227	3.86083	0.161473	6.08864	0.023918	4.20299	0.690301	41.8095	4.20299	0.0489638	4.40527	164.508	6.32558	8.54199	146.081	103.32	104.328	151.992	8.59492	9.10801	152.37	6.32902	7.03773	-4.3055	-0.248859	73.9005	151.985	6.36876	150.287	2410.59	415.854	4.29353	2778.52	455092	4.09416	0.0322104	25.9178	0.334091	4.91735	12.7045
CSUF-4_M_404	Sweeps 23-41	91.3152	41.1095	2.6048	0.450194	2080.65	211.745	6.57441		0.00733244	13.5409	0.159362	12.0715	0.0240685	5.62348	0.465848	41.548	5.62348	0.0480212	10.6816	147.664	19.9221	20.3782	100.319	252.658	253.065	150.144	16.8483	17.0509	153.318	8.52008	8.93544	-52.8303	-2.11383	385.004	150.082	8.62486	153.732	1285.49	161.628	11.577	570.937	431565	0.652685		7.02271	0.0230944	0.403982	1.78127
CSUF-4_L_288	Sweeps 23-35	373.706	246.088	11.4172	0.658508	8073.61	1452.85	79.0163		0.00795989	8.93038	0.163324	7.31613	0.024125	4.37074	0.597412	41.4507	4.37074	0.0490999	5.86706	160.25	14.2543	15.551	152.573	137.441	138.232	153.609	10.4294	10.905	153.674	6.63725	7.39265	-0.721587	-0.0423005	90.8367	153.607	6.68703	152.945	1516.3	240.605	8.52324	1588.33	443253	0.868347		15.0296	0.136501	3.27171	6.05498
CSUF-4_L_289	Sweeps 23-41	112.737	68.9485	3.36455	0.611588	2195.45	99.7829	3.03178		0.00734406	13.5145	0.153276	10.0726	0.0242411	4.10316	0.407357	41.2523	4.10316	0.0458587	9.19903	147.897	19.9146	20.6156	-9.81715	222.152	222.649	144.801	13.593	13.8923	154.404	6.26017	6.98732	1672.8	-6.63211	35591	144.612	6.36982	155.068	1900.73	244.37	11.5941	615.016	468124	0.654078		8.25464	0.0463161	0.879452	2.16314
CSUF-4_M_323	Sweeps 23-41	549.029	419.329	17.267	0.763765	12078.1	433.94	14.5281		0.00769014	6.07642	0.168803	5.93062	0.0243523	4.04733	0.682446	41.0639	4.04733	0.0502735	4.3349	154.84	9.37276	10.8526	207.666	100.526	101.537	158.38	8.69698	9.24152	155.104	6.20265	6.94613	25.3109	2.06816	36.2783	158.443	6.23127	155.139	2026.78	128.645	6.81699	1119.79	462215	0.690413		23.8252	0.205841	2.64612	6.48355
CSUF-4_M_313	Sweeps 23-41	365.396	121.72	10.3185	0.333117	8088.14	405.833	9.23699		0.00740767	7.86421	0.168531	5.90064	0.0245493	3.82456	0.64816	40.7343	3.82456	0.0497896	4.49337	149.173	11.6881	12.8348	185.168	104.631	105.611	158.143	8.6411	9.18659	156.344	5.90754	6.6942	15.5665	1.13781	47.8167	158.178	5.94213	156.725	906.994	167.359	4.80517	894.23	458362	0.997489		5.96587	0.0875504	1.28162	2.64354
CSUF-4_M_363	Sweeps 23-41	170.862	64.1688	4.92022	0.375559	3764.15	186.734	5.61749		0.00783548	10.2743	0.165721	9.17198	0.0246518	4.01591	0.437846	40.5649	4.01591	0.0487558	8.24607	157.755	16.1451	16.7738	136.057	193.763	194.287	155.698	13.2396	13.5168	156.989	6.22839	6.81678	-15.3842	-0.828771	164.385	155.673	6.30761	156.943	1235.2	207.476	10.9876	580.511	446815	0.734662		4.15348	0.0208218	0.292549	1.64315
CSUF-4_M_364	Sweeps 23-35	371.659	154.884	10.9906	0.416737	8578.9	602.11	14.1532		0.00795127	9.44608	0.178326	8.13669	0.0249647	3.19319	0.392444	40.0565	3.19319	0.0518067	7.48393	160.077	15.0613	16.1477	276.851	171.394	171.976	166.619	12.5033	12.8701	158.957	5.01373	5.82365	42.5839	4.59844	35.5915	166.766	5.07295	158.881	733.249	144.281	4.54553	539.519	456216	0.849891		14.1437	0.0311971	0.359617	1.29431
CSUF-4_M_386	Sweeps 23-41	88.6072	46.9326	2.74317	0.52967	2077.68	115.386	1.92694		0.00888753	11.5284	0.163738	13.2093	0.0250638	5.30447	0.401571	39.8982	5.30447	0.0473808	12.0975	178.843	20.5267	21.1696	68.4117	287.866	288.228	153.97	18.8714	19.0613	159.58	8.36095	8.81794	-133.264	-3.64352	981.616	153.861	8.4975	157.901	1506.73	356.267	10.0372	1052.24	424837	1.28219		9.6143	0.0380224	0.981769	2.35394
CSUF-4_M_391	Sweeps 23-41	99.2685	36.8153	2.93829	0.370866	2346.53	935.987	15.8342		0.00758845	7.42422	0.163263	9.50131	0.025601	4.22766	0.444956	39.0609	4.22766	0.0462519	8.50892	152.8	11.3014	12.1382	10.7538	204.686	205.206	153.556	13.5402	13.8021	162.958	6.80295	7.37956	-1415.35	-6.12288	28843	153.372	6.91155	163.561	929.098	81.6187	3.47076	238.045	446436	0.195203		2.31605	0.00953221	0.112515	0.551407
CSUF-4_M_331	Sweeps 23-41	407.819	201.839	12.854	0.494921	9362.07	6206	267.848		0.00894067	4.16531	0.170593	6.44016	0.0258567	3.63953	0.565131	38.6746	3.63953	0.0478505	5.31314	179.907	7.46044	9.78565	91.9065	125.871	126.715	159.933	9.52975	10.0385	164.565	5.91358	6.7801	-79.0566	-2.89575	245.312	159.844	5.97604	163.323	1238.98	291.948	19.6185	858.893	450736	1.08264		8.81635	0.0452394	0.622038	2.79625
CSUF-4_S_447	Sweeps 23-41	276.572	118.06	8.60112	0.42687	6606.47	422.387	10.1695		0.0090563	11.7362	0.177296	7.84694	0.0259473	4.44361	0.566286	38.5397	4.44361	0.0495571	6.46752	182.223	21.29	21.9393	174.282	150.901	151.56	165.731	11.9989	12.3444	165.134	7.2447	7.81477	5.24898	0.360488	82.1448	165.743	7.30383	163.954	707.261	106.579	2.57281	371.538	441826	0.911843	0.010866	10.5259	0.0358569	0.530526	0.749362
CSUF-4_M_374	Sweeps 23-41	301.514	162.64	9.59875	0.539409	6936.11	666.811	12.8074		0.00831099	9.07542	0.181082	6.31034	0.0260388	4.92191	0.779975	38.4043	4.92191	0.0504374	3.94907	167.289	15.1195	15.8736	215.205	91.4533	92.5275	168.991	9.82375	10.2511	165.708	8.05209	8.56298	22.9997	1.94236	32.9352	169.054	8.0842	165.568	1469.15	178.614	5.01011	595.364	438737	1.55078		22.6422	0.0467056	0.86458	2.14068
CSUF-4_M_381	Sweeps 23-41	409.932	90.8285	11.9993	0.22157	9595.58	263.317	7.59445		0.008423	10.356	0.178113	7.58418	0.0261134	6.01399	0.792964	38.2945	6.01399	0.0494687	4.6208	169.534	17.4836	18.1581	170.087	107.897	108.824	166.435	11.6425	11.9949	166.177	9.86617	10.2889	2.29835	0.154933	62.2495	166.44	9.91936	166.061	1710.76	143.176	1.64123	310.177	436574	0.654909		3.14341	0.0208967	0.216301	0.702326
CSUF-4_M_328	Sweeps 23-41	517.991	283.828	16.7517	0.54794	11896.2	359.534	12.1382		0.00868597	4.33694	0.182781	7.5945	0.0262547	5.93438	0.781405	38.0884	5.93438	0.0504921	4.73915	174.804	7.54846	9.74356	217.728	109.699	110.623	170.451	11.9167	12.3773	167.065	9.78691	10.3495	23.2688	1.98645	38.9203	170.516	9.82581	166.366	1549.81	191.135	4.53104	896.67	435967	3.28326		41.011	0.129784	1.44158	3.73154
CSUF-4_M_409	Sweeps 23-41	178.469	69.6497	5.50783	0.390261	4460.69	165.148	5.42749		0.00811369	8.94464	0.183703	6.97749	0.0263627	4.8151	0.690091	37.9324	4.8151	0.0505389	5.04977	163.333	14.5507	15.304	219.873	116.843	117.684	171.242	10.9952	11.3867	167.743	7.97282	8.49886	23.7092	2.04314	40.7036	171.309	8.01173	168.02	676.724	150.003	4.02294	331.95	431125	0.506393		10.947	0.0156875	0.381233	0.647632
CSUF-4_L_266	Sweeps 23-41	32.1315	7.28283	0.942633	0.226657	770.33	64.0077	4.08449		0.00857229	27.6826	0.137917	22.4098	0.0263935	9.10328	0.406218	37.8881	9.10328	0.0378983	20.4776	172.526	47.5564	47.97	-492.407	544.331	544.576	131.187	27.5788	27.7022	167.937	15.0904	15.4613	134.105	-28.0134	37.826	130.455	15.5209	167.774	658.71	205.944	3.29821	449.441	436593	0.247508		1.56355	0.00972968	0.372681	0.515967
CSUF-4_M_376	Sweeps 23-41	342.073	133.608	10.7149	0.390585	8238.83	873.005	22.942		0.00899351	6.29338	0.180942	5.18218	0.0264983	4.07199	0.785768	37.7382	4.07199	0.0495244	3.20529	180.966	11.338	12.4858	172.724	74.8081	76.1379	168.871	8.0622	8.57688	168.595	6.77619	7.39558	2.39017	0.163142	42.4573	168.876	6.81354	167.819	958.423	200.753	12.501	799.247	437760	1.81571		8.63432	0.043179	1.1043	2.37616
CSUF-4_L_271	Sweeps 23-41	325.872	124.508	10.1338	0.382075	6860.95	4548.02	230.034		0.00849287	7.08343	0.167145	8.99231	0.0266403	6.20775	0.69034	37.5371	6.20775	0.0455044	6.50581	170.934	12.057	13.5644	-28.5813	157.675	158.379	156.938	13.0759	13.4352	169.487	10.3842	10.9261	692.997	-7.9957	3271.6	156.694	10.5145	169.398	973.788	219.006	6.04593	708.194	442334	1.01128		11.7689	0.035589	0.858145	1.91973
CSUF-4_M_397	Sweeps 23-29	359.573	194.062	11.5653	0.539701	9271.05	174.073	5.13656		0.00745809	6.98239	0.192277	12.0603	0.0267443	5.78077	0.479321	37.3912	5.78077	0.0521429	10.5846	150.185	10.4476	12.2338	291.667	241.759	243.029	178.57	19.7487	20.2157	170.14	9.70672	10.5127	41.6665	4.72125	48.4661	178.731	9.77938	171.91	1600.68	180.103	22.5602	570.688	452684	1.35549	0.0584306	12.0708	0.0741316	1.35619	3.39763
CSUF-4_M_392	Sweeps 23-41	263.148	134.389	8.62185	0.510698	6583.44	365.619	30.0789		0.00817233	9.45541	0.183697	8.24596	0.0272584	4.47998	0.543294	36.6859	4.47998	0.0488766	6.92284	164.509	15.4919	16.2088	141.949	162.488	163.111	171.237	12.9937	13.3264	173.367	7.66329	8.24416	-22.1332	-1.24372	139.909	171.196	7.74103	174.107	1198.07	225.947	2.97202	890.679	430300	1.11547		17.8631	0.0694762	0.902087	3.12056
CSUF-4_M_344	Sweeps 23-41	179.71	73.4059	5.98458	0.40847	4151.76	282.361	4.24		0.00956717	9.75346	0.184859	8.71209	0.0280527	5.32481	0.611198	35.6471	5.32481	0.0477929	6.89542	192.454	18.6818	19.8551	89.0622	163.442	164.095	172.233	13.8015	14.2096	178.35	9.36661	10.0326	-100.253	-3.55133	367.644	172.116	9.46697	177.423	1103.27	203.798	8.45096	426.83	454244	0.739808		11.1983	0.0168121	0.302978	1.09718
CSUF-4_L_285	Sweeps 23-41	13.1223	6.28855	0.454934	0.479226	301.17	44.4744	2.20539		0.0103227	33.6254	0.207002	32.801	0.0282205	12.585	0.383677	35.4352	12.585	0.0531997	30.2907	207.574	69.4407	69.8426	337.327	686.238	686.379	191.034	57.1195	57.2392	179.401	22.2664	22.5553	46.8168	6.08927	108.394	191.253	22.5354	177.204	1181.64	344.963	8.68304	2627.6	436171	0.499106		3.28604	0.0472985	2.01302	7.32589
CSUF-4_S_443	Sweeps 23-41	189.829	72.679	6.52048	0.382865	5179.34	283.075	2.88873		0.00987492	7.76475	0.210261	6.45134	0.0290435	5.13208	0.795506	34.4311	5.13208	0.0525059	3.90916	198.614	15.3464	16.3961	307.487	89.0352	90.0971	193.772	11.3804	11.8608	184.559	9.33741	9.89195	39.9783	4.7543	17.643	193.945	9.3543	183.698	610.972	187.084	4.96636	457.613	420909	0.509433		8.63397	0.0276179	0.81499	1.36516
CSUF-4_M_368	Sweeps 23-41	101.605	45.7086	3.6263	0.449865	2695.37	346.885	10.8435		0.0102222	9.97411	0.16368	12.759	0.0299045	5.26754	0.41285	33.4398	5.26754	0.039697	11.6209	205.564	20.3992	21.2436	-370.573	301.271	301.681	153.919	18.2225	18.4199	189.951	9.85974	10.4091	151.259	-23.4091	41.7574	153.215	10.1329	188.815	1312.38	121.754	5.73653	358.458	438910	0.327575	0.0134091	5.98025	0.0462857	1.11799	2.02925
CSUF-4_L_284	Sweeps 23-41	73.2798	25.3317	2.63244	0.345685	1790.49	103.508	3.09474		0.00930453	14.9015	0.235663	8.19851	0.0309976	5.02638	0.613085	32.2606	5.02638	0.0551395	6.47696	187.195	27.766	28.5756	417.908	144.668	145.32	214.863	15.8765	16.4011	196.789	9.74189	10.5091	52.911	8.41197	16.4667	215.197	9.75212	197.315	976.896	210.87	7.8288	407.159	442696	0.311245		4.80942		0.311133	1.45963
CSUF-4_M_394	Sweeps 23-41	273.79	79.2793	11.5531	0.289562	9233.74	708.462	35.0557		0.0165841	13.6687	0.288183	10.2813	0.0353045	7.49219	0.72872	28.325	7.49219	0.059202	7.04076	332.452	45.0702	46.0804	574.512	153.094	153.662	257.128	23.3544	23.7407	223.662	16.4698	16.9267	61.0692	13.0153	10.763	257.724	16.3787	218.711	483.898	119.29	1.3901	474.41	435013	0.73221		6.83152	0.0875446	1.2366	2.00068
CSUF-4_L_300	Sweeps 23-41	161.765	56.8115	11.3905	0.351198	8497.24	491.223	20.8206		0.0197731	6.69447	0.457332	5.65184	0.0601528	4.4692	0.790752	16.6243	4.4692	0.055141	3.4597	395.756	26.2361	29.7777	417.967	77.2742	78.4892	382.401	18.0091	19.2426	376.555	16.3469	17.9636	9.90792	1.52875	17.1094	382.495	16.5215	375.512	1004.89	239.664	4.27042	825.298	434904	0.69086		9.24322	0.0347753	0.790427	2.76361
CSUF-4_M_410	Sweeps 23-41	366.142	85.0388	99.1408	0.232256	85206.2	3241.83	204.672		0.0682101	4.15974	2.83136	5.8909	0.234394	5.65885	0.960608	4.26631	5.65885	0.0876086	1.63712	1333.69	53.6871	65.5605	1373.91	31.4884	33.5812	1363.88	44.2032	46.3963	1357.49	69.2691	72.6074	1.19542	0.468793	5.52693	1363.93	74.0267	1358.21	482.644	570.58	10.0919	1541.83	415087	1.60899		3.53927	0.039413	1.36556	2.91511
CSUF-4_L_305	Sweeps 23-41	173.782	41.9486	61.6814	0.241387	46761.6	753.785	19.6413		0.0917643	6.27394	4.60611	4.54588	0.299379	4.16594	0.916421	3.34025	4.16594	0.111586	1.81933	1774.53	106.585	122.773	1825.43	32.9962	34.8362	1750.37	37.9245	41.8738	1688.23	61.8752	68.8747	7.51598	3.55041	3.77945	1750.69	68.1424	1685.67	302.798	540.167	7.23135	1363.07	426232	0.583438		2.713	0.0389201	0.597517	2.51972
CSUF-4_M_380	Sweeps 23-41	102.108	27.3901	36.6433	0.268245	26418.1	2177.61	69.1866		0.0836533	4.70969	4.41471	4.86206	0.304409	4.57117	0.940171	3.28505	4.57117	0.105182	1.65651	1623.8	73.4848	86.3316	1717.5	30.4482	32.4282	1715.1	40.251	43.1557	1713.14	68.7685	73.7952	0.254053	0.114666	4.37708	1715.11	76.3799	1716.06	506.825	93.8346	3.87009	236.111	443991	0.253077		3.60974			0.298098
CSUF-4_M_326	Sweeps 23-41	119.514	69.2265	48.3777	0.579235	34996.4	3721.72	117.362		0.0922465	3.72738	4.88604	5.45727	0.315919	4.93255	0.903849	3.16537	4.93255	0.112171	2.3349	1783.45	63.6275	87.7806	1834.88	42.2986	43.7479	1799.85	45.998	49.3825	1769.77	76.3371	82.6115	3.54854	1.67143	4.71721	1800	85.271	1768.77	1171.4	157.559	3.18729	549.862	451901	2.91354	0.102743	9.15659	0.193313	1.913	2.73656
DISCORDANT >10%
CSUF-4_M_345	Sweeps 23-41	375.83	93.4559	102.809	0.248665	75794.5	8060.38	142.597		0.080603	4.41207	3.36785	4.89889	0.229083	4.67207	0.953699	4.36523	4.67207	0.106625	1.4734	1566.83	66.518	84.9922	1742.5	26.9975	29.2675	1496.95	38.3542	41.8368	1329.69	56.1357	61.2703	23.6906	11.1732	3.43166	1497.99	58.4656	1321.95	558.831	376.41	7.87023	1043.49	448286	2.64137		8.22655	0.0585967	1.3125	2.97457
IGNEOUS SAMPLES
MT24-1 Moraga Fm Tuff
MT24-1_M_54	sweeps 23-41	675.332	226.976	1.06044	0.336096	2021.24	143.858	3.78953		0.000620925	9.92775	0.0116387	9.61528	0.00127715	3.55039	0.369245	782.991	3.55039	0.0660939	8.93579	12.5463	1.24518	1.27033	809.367	186.949	187.046	11.7495	1.12324	1.14375	8.22781	0.291933	0.328174	98.9834	29.9733	0.237564	11.8269	0.291239	7.99108	863.544
MT24-1_M_72	sweeps 23-41	894.03	361.131	1.37217	0.403936	2658.19	159.347	5.67779		0.000462447	7.9339	0.00862658	9.47298	0.00128545	3.09602	0.326826	777.936	3.09602	0.0486722	8.95277	9.34488	0.741242	0.76444	132.054	210.522	210.631	8.72172	0.822669	0.838151	8.28124	0.256224	0.297382	93.7289	5.05039	9.99942	8.73143	0.259517	8.21039	948.723	623.582	2.70249	1732.98	509584	5.39989	10.006	51.9438	3.99009	20.0516	8.3988
MT24-1_M_27	sweeps 23-41	993.049	438.175	1.54461	0.441242	2812.43	168.593	3.41456		0.000446794	12.5018	0.00786544	8.29263	0.00130123	4.4595	0.537767	768.501	4.4595	0.0438396	6.99146	9.02864	1.12849	1.14294	-119.7	172.446	172.592	7.95519	0.657117	0.673068	8.38284	0.37359	0.403364	107.003	-5.37573	10.094	7.94576	0.376214	8.33555	1064.28	398.228	3.94795	2353.24	494873	6.3733		26.2238	0.106265	2.16421	5.77767
MT24-1_M_36	sweeps 23-41	926.868	373.831	1.44132	0.403327	2626.49	126.965	4.26112		0.000465292	11.681	0.0087428	12.0223	0.00130397	5.9495	0.494872	766.889	5.9495	0.0486275	10.447	9.40237	1.09803	1.11413	129.885	245.757	245.85	8.83871	1.058	1.07035	8.40045	0.499459	0.522288	93.5324	4.95842	12.2435	8.84837	0.500928	8.33382	1025.26	729.978	3.42013	2042.03	510377	6.4782	11.4027	49.2933	4.25855	22.6427	8.39039
MT24-1_M_62	sweeps 23-41	934.342	368.672	1.40844	0.394579	2724.41	141.063	5.66024		0.000336191	15.0811	0.00947565	11.8769	0.00130603	4.18161	0.352079	765.678	4.18161	0.0526204	11.1164	6.79399	1.02444	1.03343	312.467	252.961	253.045	9.57611	1.132	1.1456	8.41373	0.3516	0.383592	97.3073	12.1384	2.18279	9.60171	0.354304	8.51895	982.356	332.256	2.62442	1769.57	480432	5.55083		25.6992	0.0698948	1.36696	4.37464
MT24-1_M_44	sweeps 23-41	704.988	255.639	1.08367	0.362615	2074.3	103.037	4.71806		0.000432206	9.98593	0.00977951	8.9138	0.00130949	3.74596	0.420243	763.654	3.74596	0.0541642	8.08849	8.73392	0.871975	0.889411	377.914	181.933	182.048	9.88171	0.876564	0.895116	8.43602	0.315803	0.351142	97.7677	14.63	1.07789	9.91353	0.316139	8.41832	175.538	565.697	3.41928	2068.39	487820	2.52979	0.00608809	9.541	0.0711358	1.52463	4.70924
MT24-1_M_67	sweeps 23-41	1219.03	642.129	1.9657	0.526754	3839.96	623.84	15.2549		0.000443826	10.0466	0.00951842	5.43798	0.00130969	2.35747	0.433519	763.538	2.35747	0.0527102	4.9004	8.96868	0.900849	0.918558	316.373	111.432	111.624	9.61914	0.520617	0.549813	8.43729	0.198776	0.251329	97.3331	12.2864	0.941423	9.64516	0.199098	8.39018	1206.39
MT24-1_L_3	sweeps 23-41	468.303	171.322	0.728506	0.365835	1235.04	39.2684	2.549		0.000498399	25.4063	0.00846842	16.2394	0.00131188	5.21054	0.320857	762.264	5.21054	0.0468173	15.3808	10.0712	2.55809	2.56602	39.9075	367.957	368.022	8.56249	1.38465	1.39339	8.45139	0.440074	0.465705	78.8226	1.29755	195.264	8.56494	0.446516	8.35427	1120.35	357.194	3.26345	1553.08	496894	1.99326	0.00337592	8.21468	0.0239063	1.0405	3.47453
MT24-1_M_71	sweeps 23-41	857.182	456.205	1.40681	0.532215	2689.92	437.007	10.2093		0.000478641	10.6549	0.0101402	12.8143	0.00131292	4.27293	0.333451	761.663	4.27293	0.0560157	12.0809	9.67204	1.0303	1.04831	452.956	268.203	268.279	10.2444	1.30614	1.31963	8.45805	0.36117	0.392699	98.1327	17.4371	1.10853	10.2837	0.363999	8.3492	1320.9
MT24-1_M_60	sweeps 23-41	1080.53	589.405	1.76517	0.545475	3305.45	121.487	7.60182		0.000462863	7.59972	0.00830028	7.59093	0.00132093	1.97182	0.25976	757.044	1.97182	0.0455736	7.33036	9.35329	0.710659	0.734961	-24.8876	177.533	177.669	8.39318	0.634494	0.65299	8.50962	0.167683	0.228406	134.192	-1.38731	243.908	8.39061	0.17167	8.43191	1149.5	408.272	3.12279	3084.9	490440	3.36688	1.0612	24.5671	0.486916	5.0019	10.357
MT24-1_L_14	sweeps 30-41	620.772	190.268	0.931897	0.306502	1758.12	1134.19	34.8773		0.000356708	22.6462	0.00960984	10.4163	0.00132216	4.92362	0.472682	756.337	4.92362	0.0527145	9.17922	7.20854	1.63217	1.64153	316.525	208.728	208.867	9.71108	1.00672	1.01629	8.51758	0.419096	0.43571	97.309	12.2901	1.77945	9.73736	0.418947	8.58269	531.234	344.303	2.77824	1494.09	471888	5.1054	0.109206	11.3805	0.123046	1.24282	2.7964
MT24-1_M_30	sweeps 23-41	748.786	321.246	1.15433	0.429023	2076.25	589.22	21.9303		0.000351718	15.989	0.00914106	11.806	0.00132441	4.9743	0.421337	755.055	4.9743	0.050058	10.7069	7.10773	1.13626	1.14517	197.723	248.741	248.831	9.23951	1.08587	1.09896	8.53203	0.424128	0.451523	95.6849	7.65714	5.4328	9.25509	0.426069	8.6332	919.859	346.2	2.57835	2499.12	501740	4.4756	0.964042	15.2572	0.46584	3.56477	8.30987
MT24-1_M_29	sweeps 23-41	812.32	258.836	1.23018	0.318638	2345.89	665.75	17.6592		0.000411721	10.3038	0.00798787	11.049	0.00132528	3.8266	0.34633	754.559	3.8266	0.0437142	10.3652	8.32004	0.857105	0.873212	-126.733	256.007	256.106	8.07852	0.889056	0.901285	8.53763	0.326485	0.361392	106.737	-5.68302	13.6109	8.0684	0.331244	8.5489	360.553	341.651	3.31594	2015.47	493252	7.18996		16.2113	0.0500937	1.18603	3.59526
MT24-1_M_43	sweeps 23-41	121.24	39.9527	0.199749	0.329535	369.894	11.0234	0.58815		0.000751407	33.3378	0.00980598	20.6966	0.00132882	7.70277	0.372175	752.546	7.70277	0.0535208	19.2098	15.1818	5.05939	5.06855	350.915	434.158	434.207	9.90832	2.04071	2.04879	8.56045	0.658955	0.677115	97.5605	13.6034	3.024	9.93799	0.662338	8.20494	836.958	264.084	16.017	761.844	493038	0.755975	0.00533811	1.53681	0.0480478	1.16922	2.7593
MT24-1_M_56	sweeps 35-41	1296.39	804.94	2.09395	0.62091	3600.63	3600.63	404.949		0.000378384	10.8977	0.00703659	16.2221	0.00132924	7.48356	0.46132	752.309	7.48356	0.0383935	14.3928	7.64651	0.833137	0.860083	-457.933	379.859	380.022	7.11981	1.15094	1.15557	8.56314	0.640403	0.651422	101.87	-20.2721	1.55744	7.08796	0.649757	8.66047	1409.96
MT24-1_M_28	sweeps 23-41	700.67	277.35	1.16261	0.395836	1976.05	224.885	5.54658		0.000626998	15.9101	0.0112059	12.8769	0.00132983	5.1175	0.397417	751.978	5.1175	0.0611154	11.8163	12.669	2.01502	2.03099	643.311	253.99	254.066	11.315	1.44893	1.46363	8.56691	0.438121	0.464885	98.6683	24.2871	0.530167	11.3754	0.436942	8.29949	621.294
MT24-1_M_73	sweeps 23-41	1069.64	509.146	1.74502	0.475999	3314.68	77.0894	1.63552		0.000471609	9.25591	0.00934976	11.211	0.00133912	4.25398	0.379448	746.761	4.25398	0.0506385	10.3726	9.52998	0.881878	0.902233	224.395	239.81	239.902	9.44948	1.05447	1.06867	8.62672	0.366734	0.399021	96.1556	8.70692	4.1118	9.4676	0.36921	8.55497	1366.73
MT24-1_M_75	sweeps 23-41	864.504	380.345	1.66367	0.439957	2638.67	75.1688	1.53392		0.000983394	4.40095	0.0203786	6.82612	0.00134397	3.27889	0.480345	744.064	3.27889	0.109972	5.98705	19.8667	0.873896	0.959863	1798.96	108.937	109.062	20.4841	1.38426	1.434	8.65798	0.283695	0.324629	99.5187	57.7331	0.0331371	20.7418	0.272019	7.83968	1135.95
MT24-1_M_42	sweeps 35-41	1213.48	639.07	2.08613	0.526642	3375.52	79.1965	2.33091		0.000542617	14.6416	0.0118354	14.1294	0.00134752	6.26016	0.44306	742.102	6.26016	0.0637009	12.6669	10.9645	1.60494	1.63406	731.682	268.353	268.502	11.9469	1.67813	1.68709	8.68085	0.54307	0.556475	98.8136	27.3381	0.44142	12.0187	0.538379	8.47842	1472.01	362.98	5.77841	2162.17	443703	7.52918	0.2427	24.1502	0.227473	2.38176	5.09712
MT24-1_L_21	sweeps 23-41	623.104	248.258	0.985091	0.398421	1892.95	86.2592	3.85069		0.000430478	13.507	0.00837219	10.9114	0.00134871	4.04011	0.370265	741.45	4.04011	0.0450215	10.1359	8.69902	1.17472	1.18761	-54.4398	246.867	246.967	8.46559	0.919873	0.932808	8.68847	0.350787	0.384506	115.96	-2.63279	72.3752	8.46068	0.354966	8.68778	886.151	288.923	3.19722	1532.57	480816	3.56195		13.3256	0.0883143	1.35757	3.54986
MT24-1_M_48	sweeps 23-41	757.097	337.563	1.19693	0.445865	2266.82	83.3136	3.49974		0.000375507	15.9354	0.00891306	11.678	0.00134888	4.89425	0.419098	741.355	4.89425	0.0479239	10.603	7.58838	1.20901	1.21855	95.5135	251.023	251.115	9.01007	1.04754	1.06054	8.68958	0.425003	0.45351	90.9022	3.55702	23.9143	9.01713	0.427824	8.7711	699.286	323.177	4.29353	1591.46	482359	3.26359		13.3557	0.0710871	1.44878	4.16382
MT24-1_M_66	sweeps 23-41	1169.19	598.868	1.95204	0.512209	3667.12	321.158	8.00167		0.00047721	8.93095	0.00991265	7.21866	0.00135324	4.13346	0.572607	738.965	4.13346	0.0531266	5.91807	9.64314	0.861019	0.882389	334.229	134.147	134.306	10.0156	0.719437	0.742602	8.71768	0.360098	0.393601	97.3917	12.9588	1.0524	10.0441	0.358667	8.63809	1401.22
MT24-1_M_58	sweeps 23-41	933.161	431.873	1.58953	0.462807	2840.94	461.536	8.14526		0.000583492	13.9244	0.0108957	12.736	0.00135432	3.9021	0.306383	738.379	3.9021	0.0583489	12.1235	11.7902	1.64123	1.65816	542.917	265.022	265.096	11.0035	1.39384	1.40841	8.72459	0.340212	0.375528	98.393	20.7105	0.78694	11.0536	0.344008	8.48833	1084.32
MT24-1_L_2	sweeps 23-41	890.022	337.964	1.40775	0.379725	2567.72	224.874	7.02648		0.00041424	11.2461	0.00941205	9.79971	0.00135615	4.36567	0.44549	737.383	4.36567	0.0503357	8.77355	8.37095	0.941208	0.956003	210.562	203.349	203.459	9.51215	0.92781	0.943789	8.73636	0.381142	0.412386	95.8509	8.15574	4.01101	9.52923	0.382338	8.75915	878.911	350.34	2.78134	2164.57	493378	6.93004	0.0193646	19.687	0.073136	1.57502	4.44904
MT24-1_L_22	sweeps 23-41	1176.06	599.673	1.96736	0.5099	3837.47	273.126	14.5352		0.000476612	12.0026	0.0096274	8.11919	0.00135999	3.15434	0.388504	735.299	3.15434	0.0513418	7.4814	9.63105	1.1557	1.17173	256.206	171.972	172.1	9.72874	0.786123	0.805984	8.76111	0.276168	0.318572	96.5804	9.94605	2.29783	9.75004	0.277701	8.68666	1615.22
MT24-1_M_31	sweeps 23-41	845.535	335.397	1.56964	0.396668	2538.79	67.2801	1.62345		0.000949528	18.0919	0.0162556	15.5604	0.00136184	2.45475	0.157756	734.3	2.45475	0.0865715	15.3655	19.1829	3.4689	3.49018	1350.98	296.483	296.535	16.3729	2.52726	2.54488	8.77302	0.215209	0.267801	99.3506	46.4175	0.143399	16.5392	0.252639	8.09274	1179.45
MT24-1_L_7	sweeps 23-41	882.324	407.563	1.4388	0.46192	2699.78	307.25	14.24		0.000427794	10.7848	0.00962347	8.30123	0.0013633	4.02582	0.484966	733.516	4.02582	0.0511965	7.2597	8.64478	0.932124	0.948065	249.676	167.074	167.206	9.72479	0.803424	0.822692	8.78239	0.353322	0.387245	96.4825	9.69069	2.35803	9.74554	0.353563	8.79297	1183.98	417.12	3.33001	1958.77	484362	4.58012	0.429516	21.5586	0.210982	2.80478	5.14845
MT24-1_L_8	sweeps 23-41	951.385	455.062	1.54799	0.478315	2862.78	3209.24	67.3794		0.000441181	10.5048	0.0072704	11.4326	0.00136333	3.30811	0.289357	733.496	3.30811	0.0386772	10.9436	8.91524	0.936321	0.953195	-438.627	287.692	287.792	7.35553	0.837893	0.848552	8.78263	0.290342	0.330809	102.002	-19.4017	1.31496	7.32405	0.296998	8.77204	1654.49	345.625	3.7647	1797.16	469903	4.26769	0.0245472	17.0569	0.081947	1.55545	3.6819
MT24-1_M_74	sweeps 35-41	1729.47	1230.15	2.9747	0.71129	4843.21	170.92	2.83169		0.000420636	9.84584	0.00770312	9.81792	0.00136494	2.11639	0.215564	732.631	2.11639	0.0409308	9.5871	8.50017	0.836737	0.869775	-291.875	244.635	244.872	7.79164	0.76205	0.770361	8.793	0.185967	0.222557	103.013	-12.8517	2.5258	7.76956	0.192317	8.82917	2355.64	584.854	4.14272	2768.73	465315	8.13173	0.659849	36.837	0.353648	2.8073	7.20033
MT24-1_M_57	sweeps 23-41	1589.5	976.357	2.70525	0.614254	5010.69	438.816	6.24568		0.000438848	4.90192	0.00892531	8.33556	0.00136765	4.96635	0.595802	731.181	4.96635	0.0473311	6.69454	8.86812	0.434613	0.469561	65.9301	159.374	159.521	9.0224	0.748736	0.766876	8.81042	0.437257	0.465798	86.6367	2.34947	32.3101	9.02707	0.43815	8.80436	1416.24	554.691	3.53884	2928.77	491221	8.8699	0.29523	34.9547	0.192113	2.43042	7.37551
MT24-1_M_45	sweeps 23-41	970.661	435.212	1.58102	0.448366	2931.87	100.038	3.95701		0.000424116	11.7649	0.00944047	9.5711	0.00137018	3.51455	0.367204	729.831	3.51455	0.0499706	8.90246	8.57048	1.00809	1.02266	193.589	206.983	207.091	9.54073	0.908875	0.925586	8.82671	0.310007	0.349157	95.4405	7.48389	4.8776	9.55645	0.312557	8.84579	1282.26
MT24-1_M_33	sweeps 23-41	576.974	203.56	0.963428	0.352806	1748.94	71.1628	2.89872		0.000595215	18.6041	0.0120571	15.6977	0.00137235	4.58806	0.292276	728.675	4.58806	0.0637201	15.0123	12.027	2.23684	2.24983	732.352	318.002	318.06	12.1694	1.89891	1.91193	8.84069	0.405338	0.436016	98.7928	27.353	0.527089	12.2425	0.410579	8.65686	640.748
MT24-1_M_70	sweeps 23-41	1112.35	602.345	1.909	0.541508	3557.43	3987.77	170.965		0.000501979	13.2221	0.00989067	7.37121	0.00137263	3.98106	0.540082	728.529	3.98106	0.0522602	6.2037	10.1435	1.34085	1.35611	296.8	141.566	141.718	9.99348	0.733027	0.755677	8.84246	0.351783	0.386948	97.0207	11.5176	1.42597	10.0188	0.351014	8.72359	1421.91
MT24-1_L_25	sweeps 23-41	820.72	360.669	1.34208	0.439455	2634.88	107.21	4.3807		0.000440663	11.4709	0.00947861	8.05091	0.00137286	3.87155	0.480883	728.408	3.87155	0.0500747	7.05891	8.90478	1.02123	1.03674	198.48	163.97	164.106	9.57909	0.767578	0.787319	8.84393	0.342163	0.377892	95.5442	7.67463	3.68513	9.59528	0.342832	8.8395	1122.07	375.802	2.47263	2670.15	484829	21.5248	0.115628	21.9412	0.173981	2.21479	7.74602
MT24-1_M_53	sweeps 23-41	1069.07	548.418	1.78159	0.512984	3334.5	358.425	13.4568		0.00043051	10.7609	0.0100053	7.47707	0.00137307	4.61478	0.617191	728.296	4.61478	0.052849	5.88306	8.69966	0.93596	0.952077	322.316	133.638	133.798	10.1087	0.752087	0.774659	8.8453	0.407911	0.438587	97.2557	12.4985	1.14485	10.1365	0.406023	8.85784	1559.45	322.453	2.9223	3212.14	483421	6.91699	0.0159156	24.2445	0.143809	3.76724	9.63532
MT24-1_M_46	sweeps 23-41	1172.72	579.196	1.95271	0.49389	3630.38	152.209	4.32687		0.000443583	9.57205	0.0100215	8.4103	0.00137335	5.31327	0.631758	728.149	5.31327	0.0529239	6.51938	8.96377	0.857826	0.87647	325.516	148.009	148.153	10.125	0.847313	0.867454	8.84708	0.469747	0.496601	97.2821	12.6215	1.24418	10.1531	0.467402	8.83743	1290.57	801.615	4.24083	2436.23	487397	7.52518	12.3318	58.1106	4.16371	22.3854	10.9377
MT24-1_M_61	sweeps 23-41	858.914	308.469	1.44817	0.359139	2693.8	161.481	6.22286		0.000632453	13.1561	0.0111425	10.826	0.00137809	3.62087	0.334462	725.641	3.62087	0.0586414	10.2025	12.7792	1.68071	1.70009	553.792	222.621	222.709	11.2514	1.21134	1.22884	8.87764	0.321227	0.359679	98.3969	21.0972	0.647027	11.3035	0.323284	8.64826	1048.91
MT24-1_M_52	sweeps 23-41	1166.41	591.528	2.02325	0.507137	3592.59	128.598	3.27806		0.000523384	7.55188	0.0118984	9.47535	0.00138288	4.08004	0.430596	723.129	4.08004	0.0624027	8.55193	10.5759	0.798473	0.826155	687.933	182.474	182.577	12.0101	1.1313	1.15256	8.90845	0.363218	0.397822	98.705	25.8256	0.347522	12.0783	0.36087	8.76659	1195.04
MT24-1_M_35	sweeps 23-41	1015.27	503.108	1.70294	0.495543	3131.94	3131.94	194.749		0.000442862	13.0961	0.0101882	11.4266	0.00138398	4.64705	0.406687	722.554	4.64705	0.0533906	10.439	8.94922	1.17174	1.18542	345.457	236.152	236.242	10.2925	1.17015	1.18525	8.91553	0.414023	0.444611	97.4192	13.3787	1.76828	10.3228	0.415096	8.91274	687.936
MT24-1_L_20	sweeps 35-41	789.807	361.955	1.35387	0.458283	2163.09	60.9683	7.18239		0.000573853	15.6775	0.00919395	24.5803	0.00138451	8.1169	0.33022	722.278	8.1169	0.0481621	23.2014	11.5955	1.81736	1.84665	107.239	548.091	548.183	9.29273	2.27376	2.27785	8.91894	0.72344	0.734306	91.6831	4.02243	42.5125	9.30096	0.732728	8.71484	1602.73	485.791	2.40756	2446.51	432183	2.91338	3.09232	25.8518	1.25364	8.11157	8.87995
MT24-1_L_12	sweeps 23-41	4086.4	5863.09	8.52696	1.43478	13266.6	444.596	21.1135		0.000442945	3.85745	0.00915062	3.64882	0.00138477	2.32428	0.636995	722.141	2.32428	0.047926	2.81276	8.95089	0.345199	0.38901	95.5882	66.5914	66.941	9.24913	0.335951	0.375883	8.92063	0.207197	0.262516	90.6677	3.5517	6.50498	9.25636	0.207347	8.91199	5337.17	923.504	7.64331	13640.4	472332	21.7499	0.244238	159.735	2.44261	40.599	75.3833
MT24-1_L_24	sweeps 23-41	832.042	338.486	1.49158	0.406814	2655.51	97.5992	2.97045		0.000732063	10.86	0.0151614	8.91779	0.0013849	4.18115	0.468855	722.075	4.18115	0.0793997	7.87686	14.7911	1.60573	1.63291	1182.13	155.683	155.787	15.279	1.35235	1.38076	8.92145	0.372762	0.406352	99.2453	41.6099	0.104273	15.4183	0.364211	8.52747	1027.8	1309.76	4.26769	1883.53	501408	5.41523	26.7115	86.1653	9.56999	48.0625	16.1166
MT24-1_L_11	sweeps 23-41	994.795	503.564	1.68459	0.506199	3088.49	876.509	30.5653		0.000469892	14.3893	0.00945571	8.42561	0.00138696	4.01045	0.475984	721.001	4.01045	0.0494457	7.40993	9.49529	1.36599	1.37917	169.018	173.057	173.188	9.55606	0.801379	0.820078	8.93473	0.358075	0.392774	94.7137	6.50191	5.41674	9.56974	0.359066	8.88714	1620.66	689.747	3.36731	1988.08	466909	5.10605	8.79509	43.1798	3.15666	15.8028	8.3577
MT24-1_M_39	sweeps 23-41	1852.75	1255.64	3.22945	0.677718	5714.7	1621.82	75.1867		0.000433321	4.56388	0.00849469	7.60311	0.00138778	3.18577	0.419009	720.573	3.18577	0.044394	6.90349	8.75646	0.399548	0.436482	-88.738	169.254	169.401	8.58893	0.650272	0.669096	8.94003	0.284612	0.327781	110.075	-4.08776	19.2185	8.58119	0.287443	8.96151	1880.15	514.886	3.4835	3000.34	484732	9.61877	0.569992	37.9036	0.297615	3.63709	7.84238
MT24-1_L_19	sweeps 23-41	1020.27	539.881	1.71749	0.529157	3092.82	502.454	19.6254		0.00042782	9.38577	0.00890413	11.9543	0.00139241	5.39348	0.451174	718.178	5.39348	0.0463791	10.6685	8.64531	0.811256	0.829578	17.3471	256.315	256.408	9.00109	1.07126	1.08382	8.96983	0.48345	0.510025	48.2921	0.347298	764.024	9.00178	0.486708	8.99873	1091.19	368.55	3.28873	1830.13	479124	4.99027		18.8155	0.0703694	1.42629	4.15476
MT24-1_M_68	sweeps 23-41	532.699	219.159	0.887953	0.411412	1736.27	152.057	7.80937		0.000502175	12.7265	0.0088992	12.6767	0.00139575	4.14766	0.327188	716.461	4.14766	0.0462426	11.979	10.1475	1.29109	1.30697	10.286	288.182	288.265	8.99613	1.13538	1.14736	8.99131	0.372669	0.407115	12.5867	0.0535546	2449.06	8.99623	0.378034	8.91278	509.578	276.929	3.02566	1780.71	489261	4.57769	0.00580488	9.23968	0.0993065	2.28621	5.42414
MT24-1_L_15	sweeps 23-41	448.842	221.591	0.784488	0.493694	1431.38	74.1134	3.59676		0.000573144	11.5164	0.00773486	14.7423	0.00140875	4.59268	0.311531	709.851	4.59268	0.0398215	14.0087	11.5812	1.33335	1.3534	-362.539	362.594	362.671	7.82362	1.14895	1.15779	9.07498	0.416492	0.447654	102.503	-15.9945	2.50618	7.79603	0.424891	8.86788	1373.95	270.072	8.91564	1636.96	478145	0.842268		7.33966	0.0501143	0.946686	2.95244
MT24-1_M_64	sweeps 23-41	1234.57	696.215	2.13559	0.563935	3916.69	129.881	4.9899		0.000447866	11.2053	0.00934073	10.4388	0.00140952	4.05449	0.388408	709.462	4.05449	0.0480627	9.61918	9.05031	1.01389	1.02995	102.37	227.44	227.542	9.44039	0.980893	0.996121	9.07994	0.367886	0.4034	91.1303	3.81818	19.7095	9.44833	0.370921	9.08277	1406.72	448.373	4.48628	2984.63	495324	7.49499	0.0151254	32.4934	0.167093	2.81015	7.5577
MT24-1_L_4	sweeps 23-41	814.772	357.498	1.4204	0.438771	2421.41	81.1467	4.18544		0.000551494	11.4177	0.0118726	9.6721	0.00141522	4.87873	0.504413	706.603	4.87873	0.0608446	8.3515	11.1438	1.27202	1.29143	633.739	179.801	179.909	11.9843	1.15232	1.17271	9.11665	0.444462	0.473891	98.5614	23.9282	0.414121	12.0473	0.440176	8.96914	1214.22	962.047	3.03591	2725.75	473333	5.60375	15.941	55.3158	5.99076	29.6937	13.0777
MT24-1_L_26	sweeps 23-41	780.504	347.276	1.40649	0.444938	2488.45	177.112	7.11165		0.000646441	10.1856	0.0131782	13.0925	0.00141882	4.46459	0.341004	704.809	4.46459	0.067364	12.3077	13.0617	1.32998	1.35555	849.048	255.878	255.948	13.2936	1.72911	1.74607	9.13984	0.407767	0.440183	98.9235	31.2461	0.327956	13.3847	0.40832	8.85013	1058.71	2611.03	4.08384	2834.91	488713	4.49742	76.8595	204.943	27.4152	139.341	43.1816
MT24-1_M_38	sweeps 30-41	1530.61	871.831	2.63293	0.569596	4750.2	159.937	3.89139		0.000420162	9.79686	0.00852547	14.0648	0.00141902	3.6351	0.258454	704.711	3.6351	0.0435741	13.5869	8.49059	0.831637	0.856644	-134.707	336.105	336.205	8.61993	1.20724	1.21351	9.14111	0.332053	0.355711	106.786	-6.04626	16.9333	8.60844	0.340231	9.20392	1666.01	474.788	3.28882	2658.87	475405	8.5291	0.478622	33.3709	0.225906	2.38458	6.61778
MT24-1_M_51	sweeps 23-41	668.64	248.467	1.14941	0.3716	2104.12	149.757	7.19021		0.000578819	14.6246	0.0115397	12.4765	0.00142025	3.73305	0.299207	704.102	3.73305	0.0589288	11.9049	11.6958	1.70996	1.72597	564.466	259.298	259.373	11.6501	1.44521	1.46094	9.14901	0.341295	0.379808	98.3792	21.4683	0.747005	11.7051	0.345531	8.99379	861.819
MT24-1_M_50	sweeps 23-35	1381.02	727.4	2.38711	0.526712	4507.04	233.175	8.49383		0.000453436	8.11122	0.00931318	9.9105	0.00142214	5.69683	0.574827	703.168	5.69683	0.0474959	8.10951	9.16284	0.743049	0.777199	74.1968	192.76	192.999	9.41268	0.928533	0.944798	9.16116	0.521525	0.54746	87.6529	2.67213	32.085	9.41822	0.522697	9.16101	1561.14	441.341	3.72408	3326.81	487080	7.0492	1.83516	34.2362	0.778407	7.07372	10.6999
MT24-1_L_23	sweeps 23-41	713.479	293.122	1.32934	0.410835	2234.48	38.0093	1.20913		0.000800214	13.0982	0.0151819	15.8999	0.00142432	5.36017	0.33712	702.091	5.36017	0.0773067	14.9691	16.1676	2.11681	2.1415	1129.1	298.172	298.227	15.2996	2.41438	2.43044	9.17521	0.491457	0.518843	99.1874	40.0296	0.218966	15.4337	0.490899	8.70091	1117.87
MT24-1_M_32	sweeps 35-41	708.571	251.499	1.38302	0.354938	2068.77	41.5709	1.11595		0.00108096	30.021	0.0195587	19.8515	0.00142632	7.6751	0.386626	701.106	7.6751	0.099454	18.3078	21.8368	6.55208	6.58071	1613.9	340.992	341.083	19.6678	3.86679	3.87732	9.18808	0.704692	0.71638	99.4307	53.2837	0.127966	19.8964	0.69035	8.45351	1117.4
MT24-1_M_34	sweeps 23-41	661.031	212.841	1.10564	0.321983	2053.66	2301.75	99.0372		0.000502003	11.211	0.0109387	11.9609	0.00143162	4.97648	0.416061	698.508	4.97648	0.0554163	10.8765	10.144	1.13696	1.15504	429.055	242.467	242.552	11.0467	1.31413	1.32961	9.22224	0.458615	0.488284	97.8506	16.516	1.21938	11.0868	0.458737	9.17395	592.945	280.172	2.98927	1400.02	508649	5.4119	0.0235677	12.8441	0.0493231	0.825308	2.81697
MT24-1_L_9	sweeps 23-41	1369.84	775.027	2.5297	0.565778	4275.72	173.975	2.91279		0.000584088	13.1807	0.0115627	11.9378	0.00143238	5.52731	0.463008	698.138	5.52731	0.0585463	10.5811	11.8022	1.55516	1.57302	550.295	231.015	231.101	11.6732	1.38555	1.40173	9.22712	0.509647	0.536188	98.3232	20.9548	0.709973	11.727	0.506899	8.98029	1484.75
MT24-1_M_41	sweeps 23-41	592.989	207.707	1.04054	0.350272	1829	160.177	7.98115		0.000617445	15.4227	0.0144108	14.5246	0.00143394	3.81721	0.26281	697.38	3.81721	0.072888	14.014	12.476	1.92355	1.93977	1010.84	284.132	284.192	14.5281	2.09511	2.11191	9.23715	0.352349	0.390365	99.0862	36.4186	0.259213	14.644	0.360917	9.05171	1060.98
MT24-1_M_37	sweeps 23-41	1352.69	837.649	2.39707	0.619248	4299.35	376.521	10.6662		0.000432685	6.33653	0.00965053	8.89308	0.00143414	2.95725	0.332535	697.28	2.95725	0.0488042	8.38698	8.7436	0.553921	0.581048	138.394	196.988	197.104	9.75201	0.863102	0.881425	9.23846	0.273009	0.320546	93.3245	5.26605	9.50386	9.76331	0.276343	9.29084	1612.54	429.233	3.3773	2436.48	487679	6.9742	1.46927	31.7839	0.613853	2.01944	6.9955
MT24-1_M_55	sweeps 23-41	541.178	228.249	1.0548	0.421763	1765.75	80.4625	2.73301		0.00092004	8.40502	0.0172905	16.382	0.00143564	5.43457	0.331741	696.555	5.43457	0.0873498	15.4543	18.5874	1.56156	1.60539	1368.23	297.48	297.531	17.4064	2.82721	2.8451	9.24807	0.502233	0.529743	99.3241	46.8698	0.151471	17.5848	0.501719	8.59651	1073.28
MT24-1_M_59	sweeps 23-41	367.327	146.281	0.63699	0.398232	1160.89	45.7676	0.736505		0.000536885	14.9149	0.0116291	11.6079	0.00143598	4.20374	0.362144	696.391	4.20374	0.0587353	10.82	10.8487	1.61764	1.63218	557.322	235.949	236.033	11.7399	1.35491	1.37194	9.25025	0.388578	0.423565	98.3402	21.2067	0.706135	11.7946	0.389625	9.14539	1028.6	290.748	5.76145	1491.3	496136	2.14989	0.623986	5.91338	0.491333	5.00147	8.33352
MT24-1_M_69	sweeps 23-41	1756.89	1496.97	3.42067	0.852057	5855.84	75.8414	4.23774		0.000505383	5.80835	0.0108184	10.4567	0.00143792	3.56176	0.34062	695.448	3.56176	0.0545664	9.83139	10.2123	0.593017	0.627231	394.519	220.492	220.587	10.9258	1.13635	1.15393	9.26279	0.329682	0.370398	97.6521	15.2209	1.31486	10.9624	0.332248	9.11874	2343.86
MT24-1_M_63	sweeps 23-41	1396.02	780.927	2.64752	0.559396	4523.77	396.172	36.9594		0.000635371	7.64702	0.0131757	8.78835	0.0014455	3.93284	0.447506	691.804	3.93284	0.0661082	7.85925	12.8381	0.981423	1.01453	809.82	164.414	164.524	13.291	1.16045	1.18579	9.31154	0.365944	0.403385	98.8502	29.941	0.237778	13.3783	0.362017	8.97768	1494.54	1089.23	4.40041	3095.64	478569	7.33854	9.43419	54.6702	3.42457	16.5722	12.0503
MT24-1_M_40	sweeps 23-30	605.023	221.09	1.01702	0.365424	2003.58	142.603	3.47036		0.000429082	41.4015	0.0104752	18.5052	0.00144818	6.44625	0.348348	690.52	6.44625	0.0524613	17.3461	8.6708	3.58907	3.59768	305.559	395.211	395.248	10.5811	1.94788	1.9604	9.32884	0.600925	0.631676	96.947	11.8346	3.95372	10.6086	0.605845	9.36823	921.545	393.706	3.66744	1607.25	552591	5.79616	2.18178	14.5532	0.658593	3.87946	4.7451
MT24-1_L_13	sweeps 23-35	931.562	479.585	1.624	0.514818	2964.58	466.297	11.6043		0.000431283	12.9147	0.0100449	9.67978	0.00144842	6.84212	0.706847	690.408	6.84212	0.050298	6.84716	8.71529	1.12531	1.1466	208.771	158.755	159.029	10.1485	0.977464	0.994749	9.33035	0.637933	0.659251	95.5308	8.06211	3.41218	10.1665	0.636034	9.38353	515.907	385.336	2.97044	3122.55	484675	3.6149	0.131793	20.4275	0.191721	3.34766	10.3948
MT24-1_L_10	sweeps 23-41	1095.57	644.547	1.95161	0.588321	3499.49	110.813	5.35675		0.000452828	10.9552	0.0088326	8.62222	0.00145089	4.24183	0.491965	689.231	4.24183	0.0441522	7.50663	9.15055	1.00223	1.01886	-102.251	184.531	184.667	8.9291	0.766511	0.78359	9.34628	0.396166	0.430628	109.141	-4.67212	16.5003	8.91991	0.399246	9.36585	1556.57	446.988	3.24277	2148.02	474754	6.16963	4.31608	33.1318	1.827	9.03118	7.31446
MT24-1_L_6	sweeps 23-41	1163.21	546.173	2.15684	0.46954	3593.8	120.436	3.95548		0.000607578	9.60139	0.0131208	9.48879	0.00147377	3.97753	0.419182	678.532	3.97753	0.0645699	8.61489	12.2767	1.17838	1.20374	760.324	181.664	181.766	13.236	1.24779	1.27074	9.49354	0.377331	0.414385	98.7514	28.2749	0.302432	13.3181	0.374635	9.2757	1174.22
MT24-1_L_17	sweeps 23-41	1210.5	1192.94	2.66151	0.985498	3886.98	119.704	4.44161		0.000603089	4.93806	0.0168674	7.75508	0.00148202	2.97458	0.383565	674.756	2.97458	0.0825455	7.16193	12.1861	0.601573	0.649303	1258.49	140.005	140.118	16.984	1.30617	1.34223	9.54662	0.283762	0.332265	99.2414	43.7905	0.0873503	17.1467	0.280475	9.07223	1867.59	3446.02	6.1506	6628.76	480452	32.0005	793	2034.68	325.403	1832.6	521.313
MT24-1_L_5	sweeps 23-41	501.852	179.394	0.984588	0.357464	1436.9	163.527	7.05994		0.000965431	19.6629	0.0163258	17.3296	0.0014984	4.22625	0.243875	667.38	4.22625	0.0790215	16.8063	19.504	3.8332	3.85303	1172.68	332.63	332.679	16.443	2.82656	2.84224	9.65205	0.407615	0.443235	99.1769	41.3001	0.236039	16.5916	0.42318	9.07567	1006.97
MT24-1_L_1	sweeps 23-35	202.322	85.0092	0.366565	0.420169	609.854	20.7187	1.13869		0.000396981	28.7901	0.00997584	25.0781	0.00157264	9.15614	0.365104	635.873	9.15614	0.0460065	23.3469	8.02226	2.30916	2.31811	-2.02538	562.975	563.058	10.0791	2.51515	2.52173	10.1299	0.926782	0.943953	600.149	-0.504208	139021	10.078	0.937461	10.2763	1396.22	377.252	11.9299	1587.03	503262	0.837358		1.89739	0.10148	2.21804	6.09263
MT24-1_M_65	sweeps 23-30	1282.05	754.382	2.49341	0.588418	4902.34	241.493	4.49175		0.000510831	10.8121	0.00970374	10.9061	0.0015739	3.27544	0.300331	635.365	3.27544	0.0447158	10.4026	10.3224	1.11578	1.15409	-71.1269	254.184	254.251	9.80552	1.06425	1.08411	10.138	0.331804	0.394336	114.253	-3.39103	50.9393	9.7982	0.337854	10.1196	1677.71	917.533	3.66811	2806.43	520984	6.19657	18.1866	70.955	7.01461	37.037	15.66
MT24-1_L_16	sweeps 23-30	864.199	432.216	2.1323	0.500135	3234.59	82.8308	2.22597		0.0012569	8.52844	0.0305278	7.28061	0.00161734	1.91452	0.262962	618.297	1.91452	0.136896	7.02438	25.3887	2.1639	2.28314	2188.3	122.159	122.228	30.5337	2.18995	2.27713	10.4177	0.199287	0.292827	99.5239	65.8815	0.0280927	30.9681	0.22297	9.16285	923.249	315.261	5.62115	2420.77	472404	3.56184	3.18983	27.1039	0.660973	4.33063	7.43962
MT24-1_L_18	sweeps 23-41	145.904	26.3568	2.32526	0.180645	4740.38	98.2237	9.88887		0.00444824	12.8399	0.0986422	7.42542	0.014418	3.99031	0.537385	69.3579	3.99031	0.0496201	6.26213	89.709	11.4931	11.6325	177.201	146.033	146.188	95.5222	6.76951	6.97319	92.2805	3.65604	4.01548	47.9233	3.39368	42.9665	95.5886	3.67289	92.3534	465.666	103.524	2.40543	186.668	477557	1.20193		3.66535	0.00654304	0.199843	0.715745
OR24-2 Upper Orinda Fm Tuff Clast
OR24-2_S_32	high U signal variance	788.198	347.084	1.39321	0.440351	908.976	116.303	4.80054		0.000707527	30.4297	0.0134162	23.8204	0.0013561	5.45119	0.226893	737.41	5.45119	0.0717523	23.1883	14.2956	4.34856	4.38935	978.921	472.436	472.659	13.532	3.20199	3.21033	8.73605	0.475896	0.495138	99.1076	35.4414	15.6757	8.46886	0.496132	8.34678	0.601744	904.419	2.84846	2704.98	510293	3.97384	20.0272	63.8874	7.16842	37.7942	15.7095
OR24-2_L_73		747.602	384.441	1.38415	0.514232	1092.32	48.2909	1.69539		0.00071502	31.0747	0.0122044	19.0019	0.00139257	4.08497	0.211673	718.098	4.08497	0.0635624	18.5576	14.4469	4.48773	4.5311	727.07	393.445	393.738	12.3172	2.32635	2.336	8.97083	0.366201	0.392547	98.7662	27.1681	14.0734	8.78977	0.382552	8.5155	0.555909	257.048	8.66721	2476.84	531634	2.3471	0.0196851	7.32529	0.168267	3.83938	8.54105
OR24-2_L_72	high U signal variance	403.67	204.478	0.773773	0.506549	559.959	156.793	9.30607		0.000885588	36.5456	0.00863202	49.0546	0.00140302	9.1202	0.185346	712.747	9.1202	0.0446218	48.1993	17.8917	6.53575	6.58141	-76.2439	1178.88	1179.01	8.7272	4.26274	4.2654	9.03812	0.823717	0.835939	111.854	-3.5627	51.4576	9.07261	0.861579	8.30327	1.05293	275.177	10.1754	2802.43	509958	1.61173	0.020605	3.29508	0.439724	6.82224	14.8468
OR24-2_L_81		1225.69	540.326	2.15007	0.440834	1870.15	52.3635	0.95157		0.000568698	23.7479	0.00798576	24.5976	0.00144278	3.99537	0.159815	693.108	3.99537	0.0401436	24.2709	11.4913	2.72818	2.77363	-341.683	625.56	625.833	8.0764	1.97872	1.98363	9.29403	0.371063	0.398985	102.72	-15.0764	28.5656	9.38285	0.391235	9.15174	0.445457	221.331	4.30826	2591.74	490789	54.0299		25.5631	0.0475055	2.28691	6.59064
OR24-2_L_71		624.607	313.293	1.21258	0.501584	905.549	905.549	29.023		0.0007114	20.6214	0.0170677	14.1664	0.00145788	3.90947	0.271339	685.926	3.90947	0.0849082	13.6163	14.3738	2.96303	3.02748	1313.45	264.113	264.478	17.184	2.41386	2.43183	9.39128	0.366881	0.395596	99.285	45.3486	7.96833	8.94754	0.375186	8.9908	0.469688	257.93	7.35617	2819.4	512035	1.25224	0.049176	6.27561	0.408417	8.08439	15.4174
OR24-2_S_30		610.796	228.562	1.2553	0.374204	785.23	98.9401	2.62349		0.00128543	27.2967	0.0150375	26.1087	0.00146227	6.95238	0.264891	683.866	6.95238	0.0745842	25.166	25.9647	7.08295	7.16522	1057.34	506.659	506.862	15.1552	3.92743	3.93594	9.41954	0.654404	0.670786	99.1091	37.8461	16.6758	9.09775	0.669715	8.42123	0.820983
OR24-2_L_70		1048.14	602.417	1.91323	0.57475	1518.82	123.461	2.59999		0.00052364	19.9128	0.00736022	25.7711	0.00146823	4.52264	0.173296	681.093	4.52264	0.0363577	25.3712	10.5811	2.10644	2.15517	-604.02	690.319	690.594	7.44607	1.91192	1.91622	9.45786	0.427431	0.452625	101.566	-27.0181	33.1156	9.59355	0.446782	9.36733	0.512138	439.764	3.77566	6671.87	508573	29.067	0.0197717	67.3251	0.543085	10.521	28.5793
OR24-2_L_82		1085.39	508.071	1.94799	0.468101	1788.39	102.425	2.65981		0.000453883	27.5265	0.012131	16.6991	0.00149138	4.81522	0.285156	670.518	4.81522	0.058994	15.9898	9.17186	2.52412	2.55553	566.869	348.129	348.479	12.2435	2.03229	2.04322	9.60692	0.46225	0.48647	98.3053	21.5349	13.5605	9.46911	0.469183	9.65993	0.535787	341.829	4.25295	5002.06	494270	15.9685	0.322119	31.8738	0.222575	4.03932	13.8097
OR24-2_L_74		463.238	218.63	0.950986	0.471961	684.176	46.984	1.13574		0.000967358	24.4432	0.013539	35.2422	0.0014953	7.31385	0.206536	668.763	7.31385	0.0656687	34.4749	19.5429	4.77461	4.84905	795.864	722.816	722.972	13.6551	4.78013	4.7859	9.63211	0.703952	0.720137	98.7897	29.4613	25.2254	9.41198	0.74038	8.8706	0.848106	390.4	4.19428	2967.44	529388	14.1772	32.9708	120.899	12.2227	70.2873	29.685
OR24-2_L_88		485.456	292.075	0.958242	0.601651	764.739	764.739	28.8503		0.000648435	25.823	0.0114309	25.359	0.00149802	7.22248	0.283403	667.549	7.22248	0.0553432	24.3088	13.102	3.38224	3.43058	426.112	542.185	542.421	11.5409	2.9101	2.91692	9.64961	0.69642	0.712906	97.7354	16.3881	21.9297	9.55547	0.707957	9.31471	0.842735	291.1	8.43301	3443.65	517712	2.39433	0.0924217	6.26862	0.626005	10.0196	19.8875
OR24-2_M_54		1831.2	1013.29	3.40864	0.553346	2928.22	2928.22	49.6144		0.000501971	17.6781	0.0105515	10.4463	0.00150414	5.04345	0.477958	664.83	5.04345	0.0508771	9.14819	10.1434	1.79271	1.84378	235.251	211.087	211.729	10.6577	1.10751	1.12253	9.68906	0.488295	0.511447	95.8814	9.08844	10.4996	9.65029	0.488895	9.66659	0.559681	529.726	5.20028	8683.04	492866	48.0214	0.218263	76.6351	0.485163	9.15582	27.9759
OR24-2_L_69		585.728	254.739	1.13956	0.434909	880.789	58.8817	2.40639		0.000732828	35.5787	0.0162894	34.9053	0.00150576	6.8106	0.19404	664.118	6.8106	0.0784599	34.2344	14.8066	5.26607	5.30448	1158.53	678.976	679.124	16.4067	5.68077	5.68775	9.69943	0.660093	0.67752	99.1628	40.8812	20.8614	9.32052	0.714323	9.35005	0.803267	247.287	2.01183	3348.41	498265	5.63919		14.9397	0.108544	3.3625	11.4055
OR24-2_M_55		496.254	162.675	1.01173	0.327807	759.507	36.1122	1.67749		0.00119816	37.3785	0.0185303	22.9212	0.00150861	7.04138	0.30562	662.861	7.04138	0.089085	21.8128	24.2029	9.04128	9.09961	1405.98	417.702	417.926	18.6432	4.23424	4.24623	9.71781	0.683752	0.700572	99.3088	47.8748	12.3938	9.2072	0.689739	8.96276	0.867903
OR24-2_S_33		939.344	410.689	1.87158	0.437209	1185.84	55.3386	1.71838		0.000889811	39.5427	0.0122446	18.9444	0.00151168	5.48461	0.287071	661.516	5.48461	0.0587465	18.1331	17.977	7.10543	7.14503	557.695	395.408	395.713	12.3574	2.32685	2.33642	9.73756	0.533664	0.554992	98.254	21.2007	15.4533	9.60072	0.541557	9.1592	0.770587	377.618	2.98909	2235.73	513400	9.15666		17.3598	0.0850257	1.94909	5.98355
OR24-2_L_84		490.882	168.161	1.02401	0.342569	775.456	35.7277	1.07715		0.00127873	33.9544	0.0164158	25.0578	0.00152598	6.65832	0.264178	655.317	6.65832	0.0780212	24.157	25.8294	8.76462	8.83663	1147.43	479.879	480.091	16.533	4.10926	4.11909	9.8296	0.653988	0.672134	99.1433	40.5457	15.2976	9.45107	0.670353	8.95328	0.847984
OR24-2_M_49		494.451	162.595	0.936911	0.328839	825.706	825.706	33.2812		0.00098408	40.105	0.0057838	47.6069	0.00152647	7.37492	0.154188	655.106	7.37492	0.0274804	47.0322	19.8806	7.96918	8.01352	-1437.09	1540.58	1540.75	5.85585	2.77976	2.78159	9.83275	0.724605	0.740847	100.684	-67.9133	80.663	10.0843	0.759271	9.31319	0.875075	580.63	4.22002	1669.78	521773	6.15734	8.41346	29.2032	3.2377	16.3644	6.48683
OR24-2_M_47	reverse fractionation	455.789	148.311	0.923307	0.325394	800.542	354.245	16.2792		0.00121632	37.72	0.0136282	34.482	0.00152818	5.47576	0.157453	654.374	5.47576	0.0646789	34.0444	24.5694	9.26194	9.32003	763.91	717.478	717.636	13.7444	4.70741	4.71329	9.84375	0.538609	0.560305	98.7114	28.3799	24.8407	9.63124	0.593634	9.08221	0.750903	235.718	2.99533	1449.89	498861	5.48794		7.26725	0.048233	0.832861	3.1497
OR24-2_L_78		411.927	182.137	0.801636	0.442158	628.298	71.9667	2.12165		0.000700337	36.6782	0.0144499	36.0625	0.00152867	8.69114	0.240183	654.164	8.69114	0.0685566	34.9996	14.1504	5.18828	5.22455	885.438	723.481	723.632	14.5672	5.21578	5.2218	9.84691	0.855155	0.869139	98.8879	32.4034	24.9048	9.58584	0.883553	9.55013	0.993843	198.656	2.8387	2984.08	507612	5.67517	0.129604	19.8852	0.223686	5.09504	11.8774
OR24-2_M_59		708.209	268.79	1.43714	0.379535	1113.44	27.2411	0.612767		0.00102154	22.3683	0.0150263	15.6774	0.0015296	6.0656	0.384215	653.768	6.0656	0.0712481	14.4564	20.637	4.61378	4.69738	964.556	295.182	295.542	15.1439	2.35655	2.37083	9.85287	0.59718	0.616941	98.9785	34.9384	10.8651	9.55821	0.592563	9.19957	0.697262	388.475	3.31705	1826.32	494815	6.61533	3.33996	20.9396	1.18147	7.20301	6.00367
OR24-2_M_56	high U signal variance	565.886	418.644	1.27335	0.739802	904.761	67.6636	2.56699		0.000768356	26.7353	0.0174991	22.1238	0.00155181	4.46591	0.199278	644.41	4.46591	0.0817857	21.6684	15.5242	4.14884	4.20106	1240.38	424.686	424.916	17.6146	3.86343	3.87517	9.99584	0.446059	0.472875	99.1941	43.2527	12.7014	9.56329	0.48169	9.30229	0.736184	319.708	10.2519	1884.33	502681	3.77705		6.2336	0.16313	3.01969	6.60665
OR24-2_L_76		892.566	599.976	1.91653	0.672193	1389.19	38.8969	0.853702		0.000792337	17.1395	0.00727163	33.2046	0.00155892	4.26871	0.126747	641.469	4.26871	0.0338303	32.9291	16.0085	2.74269	2.82921	-804.258	935.143	935.364	7.35677	2.43396	2.43727	10.0416	0.428315	0.456636	101.249	-36.4951	45.5326	10.218	0.45768	9.37012	0.575072	480.92	3.65177	8217.24	517283	20.5703	10.6969	94.8255	5.19439	42.3773	51.0154
OR24-2_M_52		2157.16	1179.29	4.13407	0.546685	3452.12	274.469	1.7187		0.000501886	13.7141	0.0103774	8.72554	0.00156367	3.57294	0.401308	639.523	3.57294	0.0481331	7.96047	10.1417	1.39049	1.45556	105.799	188.103	188.858	10.4827	0.909971	0.927595	10.0722	0.359591	0.392817	90.4799	3.9167	9.01852	10.0672	0.362139	10.0868	0.413215	634.427	4.14527	9934.58	511517	74.9887		112.331	0.389571	10.7241	32.6616
OR24-2_S_34		551.493	206.467	1.11499	0.374379	731.887	38.6689	1.33008		0.000815761	33.0486	0.01925	28.457	0.00157366	7.57757	0.265106	635.463	7.57757	0.0887198	27.4296	16.4816	5.4447	5.48814	1398.13	525.818	525.995	19.3604	5.4572	5.46717	10.1365	0.767495	0.783716	99.275	47.6434	15.2811	9.60867	0.790913	9.76602	0.880855	323.137	2.0413	2059.83	502113	3.31605	0.0847595	9.29395	0.0918147	1.25036	4.49741
OR24-2_L_87		562.764	292.678	1.20709	0.520072	993.099	61.0384	1.86044		0.000822328	36.7772	0.0173166	27.5813	0.00158856	7.94642	0.286934	629.501	7.94642	0.0790604	26.4118	16.6142	6.10771	6.15085	1173.63	522.674	522.867	17.4325	4.76708	4.77652	10.2324	0.812463	0.82838	99.1281	41.3029	16.7142	9.82507	0.824702	9.69457	1.03273	279.429	3.66461	2787.35	491648	14.9755	0.663728	42.0515	0.373849	5.31156	14.7656
OR24-2_L_85		2323.36	1484.28	4.71835	0.638851	3907.27	149.187	3.3074		0.000539728	11.9639	0.0128114	9.27434	0.00158985	4.38163	0.466114	628.989	4.38163	0.0584436	8.17403	10.9061	1.30445	1.38885	546.42	178.582	179.268	12.9258	1.19119	1.21186	10.2407	0.448353	0.476627	98.1259	20.7732	8.08326	10.102	0.445879	10.1897	0.517612	566.285	5.78938	7005.36	498115	99.172	0.372399	97.9678	0.304235	5.95527	20.8941
OR24-2_M_51		684.38	266.764	1.49118	0.389789	1118.12	97.16	2.57785		0.00116845	28.1188	0.0145575	23.0238	0.00161473	6.58473	0.284317	619.3	6.58473	0.0653862	22.0621	23.6032	6.63305	6.7081	786.768	463.25	463.493	14.6749	3.35441	3.36381	10.4008	0.684312	0.70351	98.678	29.1251	16.8585	10.1672	0.694478	9.57417	0.844301	375.9	2.22856	2516.9	487304	6.08542	0.859676	12.4921	0.31278	3.66513	8.72519
OR24-2_L_80	high U signal variance	338.025	160.825	0.901574	0.475779	522.176	131.586	4.99854		0.00172444	23.2039	0.0314861	23.8103	0.00161507	6.81231	0.284524	619.169	6.81231	0.141393	22.815	34.8247	8.07372	8.21437	2244.33	394.358	394.552	31.4775	7.3799	7.39944	10.403	0.708113	0.726875	99.5365	66.951	8.0683	9.16645	0.754511	8.48321	1.00188
OR24-2_L_83	reverse fractionation	167.024	69.5174	0.398427	0.416213	292.634	12.4988	0.797654		0.00140398	34.6527	0.0251902	34.4547	0.0016152	9.27098	0.268273	619.118	9.27098	0.113111	33.184	28.3575	9.81976	9.89714	1849.99	600.049	600.189	25.2609	8.59619	8.60707	10.4039	0.963762	0.977643	99.4376	58.8144	14.5253	9.54025	1.0119	9.18862	1.23331	427.337	18.0649	1680.56	514647	0.689391	0.158956	1.54432	0.204707	4.09695	7.84528
OR24-2_M_50	high U signal variance	292.336	78.2606	0.788298	0.267708	509.877	27.516	2.08417		0.00325091	27.3404	0.0279765	35.1817	0.00162009	10.7249	0.304167	617.25	10.7249	0.125243	33.5071	65.6014	17.9066	18.1205	2032.24	593.002	593.137	28.0167	9.72201	9.73369	10.4353	1.11827	1.13019	99.4865	62.7533	13.5271	9.40865	1.14977	8.06999	1.40472
OR24-2_M_53	reverse fractionation	557.33	267.945	1.26072	0.480765	936.192	69.3872	2.66034		0.00116108	30.1653	0.00931981	39.7694	0.00163319	6.33632	0.158315	612.299	6.33632	0.0413875	39.2614	23.4543	7.07095	7.14069	-263.628	996.194	996.359	9.41935	3.7287	3.73221	10.5196	0.666014	0.68618	103.99	-11.6809	44.7713	10.6034	0.70445	9.50147	0.91792
OR24-2_L_75		930.572	832.548	2.16205	0.894663	1498.41	1498.41	21.1457		0.000655931	23.1969	0.012739	25.1807	0.00164095	4.56934	0.179232	609.402	4.56934	0.0563037	24.7627	13.2534	3.07337	3.1266	464.338	548.664	548.893	12.8532	3.21614	3.22375	10.5696	0.482565	0.510517	97.7237	17.7671	20.916	10.4542	0.511875	10.1613	0.746564	629.384	4.71399	4466.24	529723	23.9543	61.4796	227.911	23.892	131.651	54.0739
OR24-2_L_86		243.373	95.8337	0.563209	0.393772	386.055	21.1491	0.750149		0.00129302	38.1636	0.0220142	32.8731	0.00164215	8.20149	0.248535	608.959	8.20149	0.0972277	31.8336	26.1177	9.96102	10.0263	1571.61	596.196	596.347	22.1104	7.18981	7.19982	10.5773	0.866783	0.882729	99.327	52.1615	16.0424	9.91241	0.911154	9.58982	1.1276	192.07	2.78253	1667.5	528042	6.53216	0.0333258	18.0593	0.106911	2.67365	5.92995
OR24-2_M_48		514.664	209.986	1.22016	0.408005	847.852	66.767	3.38491		0.0013312	48.7015	0.0216564	33.9003	0.0016673	8.2381	0.242098	599.774	8.2381	0.0942048	32.8841	26.8885	13.0864	13.1358	1512.23	620.724	620.87	21.7549	7.29652	7.30596	10.7391	0.883963	0.899873	99.2898	50.6357	17.048	10.1055	0.931549	9.67238	1.29223
OR24-2_S_31		443.643	217.435	1.0829	0.490112	664.977	279.284	13.0857		0.00120264	26.8177	0.0239047	24.6334	0.0016748	5.32912	0.214407	597.087	5.32912	0.103519	24.0501	24.2933	6.51099	6.58943	1688.16	443.699	443.893	23.9868	5.83952	5.85374	10.7874	0.574393	0.598667	99.361	55.0277	11.2072	10.0235	0.632444	9.70102	0.820953	260.029	6.92661	2147.9	517117	2.74917	0.045425	5.73182	0.191952	4.14492	8.74662
OR24-2_M_57	reverse fractionation	425.234	136.567	1.35243	0.321158	837.368	150.723	6.05581		0.00294081	15.9789	0.0370602	19.9147	0.00196316	3.90106	0.192602	509.383	3.90106	0.136915	19.5289	59.3529	9.47005	9.80262	2188.54	339.611	339.839	36.9498	7.22615	7.25329	12.6429	0.492724	0.531266	99.4223	65.7835	11.2131	0.611677	10.2248	0.725133	6.82319
General Notes
Samples in bold selected for CA-ID-TIMS analyses (see Table 1)
Sample Notes
OR24-1
Full analytical sweeps: Isotope ratio and date errors do NOT include systematic calibration errors from 0.61 to 0.69% (207Pb/206Pb) and 1.77 to 2.04% (206Pb/238U) (all 2-sigma).
Truncated Sweeps: Isotope ratio and date errors do NOT include systematic calibration errors from 0.67 to 1.09% (207Pb/206Pb) and 1.88 to 2.40% (206Pb/238U) (all 2-sigma).
MV24-1
Full Sweeps: Isotope ratio and date errors do NOT include systematic calibration errors from 0.29 to 0.61% (207Pb/206Pb) and 1.77 to 1.81% (206Pb/238U) (all 2-sigma).
Truncated Sweeps: Isotope ratio and date errors do NOT include systematic calibration errors from 0.24 to 1.09% (207Pb/206Pb) and 1.40 to 2.40% (206Pb/238U) (all 2-sigma).
CSUF-4
Full analytical sweeps: Isotope ratio and date errors do NOT include systematic calibration errors from 0.61 to 0.62% (207Pb/206Pb) and 1.79 to 2.04% (206Pb/238U) (all 2-sigma).
Truncated Sweeps: Isotope ratio and date errors do NOT include systematic calibration errors from 0.63 to 1.09% (207Pb/206Pb) and 2.15 to 2.40% (206Pb/238U) (all 2-sigma).
MT24-1
Full analytical sweeps: Isotope ratio and date errors do NOT include systematic calibration errors of 0.29% (207Pb/206Pb) and 1.81% (206Pb/238U) (all 2-sigma).
Truncated Sweeps: Isotope ratio and date errors do NOT include systematic calibration errors from 0.24 to 1.09% (207Pb/206Pb) and 1.40 to 2.07% (206Pb/238U) (all 2-sigma).
MT24-1
Full analytical sweeps: Isotope ratio and date errors do NOT include systematic calibration errors of 0.72% (207Pb/206Pb) and 1.58% (206Pb/238U) (all 2-sigma).
	picked for tims analysis
	inherited tims analysis
	imprecise tims analysis
	trace elements compromised
[truncated: 67 more columns]

## Sheet: Table S1 - instrumental data
Table S1. Metadata for LA-ICP-MS U-(Th-)Pb analyses
Laboratory and Sample Preparation
Laboratory name	Boise State University Isotope Geology Laboratory
Sample type/mineral	Zircon
Sample preparation	Conventional mineral separation, 1 inch resin mount, 0.3 mm polish to finish
Imaging	CL, JEOL T300, 10 nA, 17 mm working distance
Laser ablation system
Make, Model and type	Teledyne (Photon Machines) Analyte Excite+
Ablation cell and volume	HelEx II active 2-volume ablation cell
Laser wavelength (nm)	193 nm ArF excimer
Pulse width (ns)	4 ns
Fluence (J cm-2)	energy stabilization mode, set daily at ~2.5 J cm-2 using in-cell EPC utility
Repetition rate (Hz)	5 Hz
Ablation duration (s)	20 s
Ablation pit depth / ablation rate	20 mm pit depth, measured using an optical microscope, equivalent to 0.1 mm/pulse
Spot diameter (mm)	25 mm
Sampling mode / pattern	Static spot ablation
Cell carrier gas flow (l min-1)	0.2 L min-1 He cup flow, 1.2 L min-1 He cell flow
ICP-MS Instrument
Make, Model and type	ThermoElectron, iCAP-RQ, single quadrupole mass spectrometer
Sample introduction	190 cm long, 1 cm i.d. PFA tubing with Teledyne 'SQUID' smoothing device, 2.5 mm quartz injector; Ni cones, high-sensitivity skimmer insert
RF power (W)	1400 W
Make-up gas flow (l min-1)	~0.65 l min-1 Ar and 2 mL min-1 N2 gas introduced in mixing bulbs between cell and torch
Detection system	single ion-counting SEM
Masses measured and dwell times per peak (ms)	29,91(5); 31,89,93,139,140,141,146,147,153,157,159,163,165,166,169,172,175,177,181(10); 202,204,208,232,238(40); 206(80); 49,207(200)
Total integration time (s)	~ 0.895 s
‘Sensitivity’ as useful yield	0.8% U [(#ions detected/#atoms sampled)*100; Schaltegger et al. 2015]
IC Dead time (ns)	44 ns
Data Processing
Gas blank	15 s on-peak zero subtracted.
Calibration strategy	Mean of ratios; mass discrimination from interspersed zircon standard materials.
Common-Pb correction	No common-Pb correction applied; sweeps with mass 204 signals above background rejected.
Data processing packages	ThermoElectron Qtegra TRA software for integrated cps acquisition; in-house Microsoft VBA coded spreadsheet for data normalisation, concentration calibration, uncertainty propagation and age calculation.
Uncertainty level and propagation	Ages quoted at 2s absolute; propagation is by quadratic addition. Systematic errors from reproducibility of primary reference material propagated where appropriate.
Discordance criteria	Discordance is the relative difference between the measured 207Pb/235U and 206Pb/238U dates; discordance outside of uncertainty of 5% is flagged with strikethrough font in Table S2.
Interpreted age transition	The transition from preferred interpretation of 207Pb/206Pb to 206Pb/38U dates is set at 1500 Ma; preferred date is flagged with bold font in Table S1.
Mass discrimination corrections	207Pb/206Pb fractionation error (from PL): 0.36% [Zircon_03Dec21_Hodgin]
	206Pb/238U fractionation error (from PL): 0.79% [Zircon_03Dec21_Hodgin]
	208Pb/232Th fractionation error (from PL): 2.15% [Zircon_03Dec21_Hodgin]
Quality control & validation standards	Plešovice (PL) (Slama et al. 2008); 336.9 Ma
	Zirconia (Covey et al., 2012); 327.2 Ma
	FC1 (Schoene et al. 2007); 1095.4 Ma
	91500 (Wiedenbeck et al., 1995); 1065.4 Ma
	Seiland (Kosler et al. 2008); 530.6 Ma
Quality control & validation results	Zircon_03Dec21_Hodgin: 91500 (206Pb/238U) = 1077.3 ± 16.4 (95% c.i., MSWD = 1.58, n = 7)
	Zircon_03Dec21_Hodgin: 91500 (207Pb/206Pb) = 1104.1 ± 92.6 (95% c.i., MSWD = 6.63, n = 7)
	Zircon_03Dec21_Hodgin: FC1 (206Pb/238U) = 1104 ± 17.1 (95% c.i., MSWD = 1.31, n = 7)
	Zircon_03Dec21_Hodgin: FC1 (207Pb/206Pb) = 1096.6 ± 25.5 (95% c.i., MSWD = 2.04, n = 7)
	Zircon_03Dec21_Hodgin: PL (206Pb/238U) = 335.6 ± 4.1 (95% c.i., MSWD = 2.43, n = 23)
	Zircon_03Dec21_Hodgin: PL (207Pb/206Pb) = 336.2 ± 19.9 (95% c.i., MSWD = 2.62, n = 23)
	Zircon_03Dec21_Hodgin: Seiland (206Pb/238U) = 531.6 ± 11.2 (95% c.i., MSWD = 0.68, n = 7)
	Zircon_03Dec21_Hodgin: Seiland (207Pb/206Pb) = 474.3 ± 78 (95% c.i., MSWD = 1.24, n = 7)
	Zircon_03Dec21_Hodgin: Zirconia (206Pb/238U) = 323.3 ± 9 (95% c.i., MSWD = 4.1, n = 7)
	Zircon_03Dec21_Hodgin: Zirconia (207Pb/206Pb) = 359.1 ± 47.5 (95% c.i., MSWD = 0.98, n = 7)
